# Supplementary material for: Synthesis of 4-functionalized pyrazoles via oxidative thio- or selenocyanation mediated by PhICl 2 and NH 4 SCN/KSeCN
Source: publisher site journal article supplement (doi:10.3762/bjoc.20.128), 2024-06-28

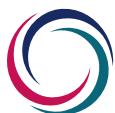

## Supporting Information

for

### Synthesis of 4-functionalized pyrazoles via oxidative thio- or selenocyanation mediated by $\text{PhICl}_2$ and $\text{NH}_4\text{SCN/KSeCN}$

Jialiang Wu, Haofeng Shi, Xuemin Li, Jiaxin He, Chen Zhang, Fengxia Sun  
and Yunfei Du

*Beilstein J. Org. Chem.* **2024**, *20*, 1453–1461. doi:10.3762/bjoc.20.128

## Synthetic details and compound characterization data

## Table of contents

|            |                         |         |
|------------|-------------------------|---------|
| <b>I</b>   | General information     | S2      |
| <b>II</b>  | Experimental procedures | S3–S4   |
| <b>III</b> | Spectroscopic data      | S5–S21  |
| <b>IV</b>  | References              | S21     |
| <b>V</b>   | NMR spectra of products | S22–S58 |

## I. General information

$^1\text{H}$  and  $^{13}\text{C}$  NMR spectra were recorded on a 400 MHz or 600 MHz spectrometer at 25 °C. Chemical shift values are given in ppm and referred to TMS (0.00 ppm) as the internal standard. Chemical shifts were expressed in parts per million ( $\delta$ ) downfield from the internal standard tetramethylsilane, and were reported as s (singlet), d (doublet), t (triplet), q (quadruple), dd (doublet of doublet), m (multiplet), etc. The coupling constants  $J$ , are reported in hertz (Hz). High resolution mass spectrometry (HRMS) was obtained on a Q-TOF micro spectrometer. Melting points were determined with a Micromelting point apparatus. TLC plates were visualized by exposure to ultraviolet light.

Reagents and solvents were purchased as reagent grade and were used without further purification. All reactions were performed in standard glassware, dried by heating at 70 °C for 3 h before use. The starting materials **1** <sup>[1]</sup> were prepared according to literature methods. Flash column chromatography was performed over silica gel (200–300 mesh) using a mixture of ethyl acetate (EtOAc) and petroleum ether (PE) as eluent.

## II. Experimental procedures

### 1. General procedure for the preparation of 4-thio/selenocyanated pyrazoles

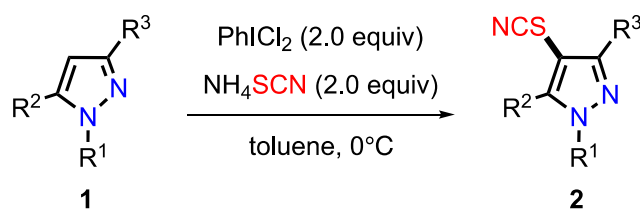

General procedure A: Under N<sub>2</sub> atmosphere, to a solution of NH<sub>4</sub>SCN (2.0 mmol) in toluene (5 mL) was added PhICl<sub>2</sub> (2.0 mmol) at 0 °C. The mixture was stirred for 30 min. Then, substrate **1** (1.0 mmol) was added to this solution in one portion and the reaction mixture was stirred for about 8 h until completion consumption of the starting material (monitored by TLC). Then, the reaction mixture was washed with water (10 mL) and extracted with DCM (3 × 10 mL). The combined organic layers were dried with MgSO<sub>4</sub> and concentrated in vacuo and the residue was purified by flash column chromatography to afford the corresponding 4-thiocyanated pyrazoles **2**.

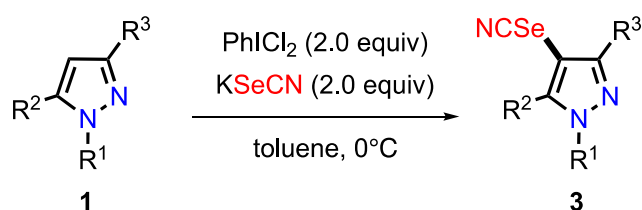

General procedure B: Under N<sub>2</sub> atmosphere, to a solution of KSeCN (2.0 mmol) in toluene (5 mL) was added PhICl<sub>2</sub> (2.0 mmol) at 0 °C. The mixture was stirred for 30 min. Then, substrate **1** (1.0 mmol) was added to this solution in one portion and the reaction mixture was stirred for about 8 h until complete consumption of the starting material (monitored by TLC). Then the reaction mixture was washed with water (10 mL) and extracted with DCM (3 × 10 mL). The combined organic layers were dried with MgSO<sub>4</sub> and concentrated in vacuo and the residue was purified by flash column chromatography to afford the corresponding 4-selenocyanated pyrazoles **3**.

## 2. General procedure for the gram-scale synthesis of compounds **2a** and **3a**.

General procedure for the gram-scale synthesis of **2a**: Under N<sub>2</sub> atmosphere, to a solution of NH<sub>4</sub>SCN (20.0 mmol) in toluene (20 mL) was added PhICl<sub>2</sub> (20.0 mmol) at 0 °C. The mixture was stirred for 1 h, and then substrate **1a** (10.0 mmol) was added to this solution in one portion and the reaction mixture was stirred for about 10 h until complete consumption of the starting material (monitored by TLC). Then the reaction mixture was washed with water (30 mL) and extracted with DCM (5 × 15 mL). The combined organic layers were dried with MgSO<sub>4</sub> and concentrated in vacuo. The residue was purified by flash column chromatography to afford the corresponding desired product **2a** (2.02 g, 88%).

General procedure for the gram-scale synthesis of **3a**: Under N<sub>2</sub> atmosphere, to a solution of KSeCN (20.0 mmol) in toluene (20 mL) was added PhICl<sub>2</sub> (20.0 mmol) at 0 °C. The mixture was stirred for 1 h. Then substrate **1a** (10.0 mmol) was added to this solution in one portion and the reaction mixture was stirred for about 10 h until complete consumption of the starting material (monitored by TLC). Then the reaction mixture was washed with water (30 mL) and extracted with DCM (5 × 15 mL). The combined organic layers were dried with MgSO<sub>4</sub> and concentrated in vacuo. The residue was purified by flash column chromatography to afford the corresponding desired product **3a** (2.21 g, 80%).

### III. Spectroscopic data

#### 3,5-Dimethyl-1-phenyl-4-thiocyanato-1*H*-pyrazole (**2a**)

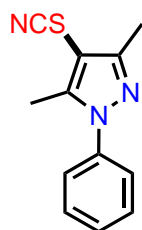

According to the procedure A, **2a** was purified by silica gel chromatography (10% EtOAc/PE). A white solid (208.6 mg, yield: 91%). mp: 99-100 °C. <sup>1</sup>H NMR (400 MHz, CDCl<sub>3</sub>) δ 7.54 – 7.45 (m, 2H), 7.43 (d, *J* = 7.3 Hz, 1H), 7.41 – 7.37 (m, 2H), 2.43 (s, 3H), 2.42 (s, 3H). <sup>13</sup>C NMR (101 MHz, CDCl<sub>3</sub>) δ 152.0, 144.3, 139.1, 129.4, 128.6, 125.0, 110.9, 96.6, 12.0, 11.5. HRMS (ESI) calcd for C<sub>12</sub>H<sub>11</sub>N<sub>3</sub>NaS<sup>+</sup> [*M* + Na<sup>+</sup>] 252.0566, found 252.0570.

The characterization data of **2a** agree with the literature values. <sup>[2]</sup>

#### 3,5-Dimethyl-4-thiocyanato-1-(*p*-tolyl)-1*H*-pyrazole (**2b**)

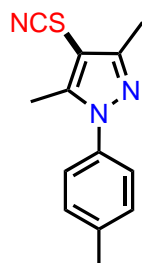

According to the procedure A, **2b** was purified by silica gel chromatography (10% EtOAc/petroleum ether). A white solid (218.9 mg, yield: 90%). mp: 87-88 °C. <sup>1</sup>H NMR (400 MHz, CDCl<sub>3</sub>) δ 7.28 – 7.26 (m, 4H), 2.42 (s, 3H), 2.41 (s, 3H), 2.40 (s, 3H). <sup>13</sup>C NMR (101 MHz, CDCl<sub>3</sub>) δ 151.8, 144.3, 138.7, 136.6, 129.9, 124.8, 111.0, 96.2, 21.2, 12.0, 11.5. HRMS (ESI) calcd for C<sub>13</sub>H<sub>13</sub>N<sub>3</sub>NaS<sup>+</sup> [*M* + Na<sup>+</sup>] 266.0722, found 266.0727.

The characterization data of **2b** agree with the literature values. <sup>[2]</sup>

### 3,5-Dimethyl-4-thiocyanato-1-(*m*-tolyl)-1*H*-pyrazole (**2c**)

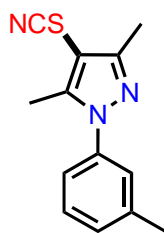

According to the procedure A, **2c** was purified by silica gel chromatography (10% EtOAc/PE). Yellow oil (221.4 mg, yield: 91%). <sup>1</sup>H NMR (400 MHz, CDCl<sub>3</sub>) δ 7.30 (t, *J* = 7.8 Hz, 1H), 7.18 (d, *J* = 9.5 Hz, 2H), 7.10 (d, *J* = 8.1 Hz, 1H), 2.36 (d, *J* = 3.7 Hz, 9H). <sup>13</sup>C NMR (101 MHz, CDCl<sub>3</sub>) δ 151.9, 144.3, 139.7, 139.0, 129.4, 129.1, 125.7, 121.9, 110.9, 96.4, 21.3, 12.0, 11.5. HRMS (ESI) calcd for C<sub>13</sub>H<sub>13</sub>N<sub>3</sub>NaS<sup>+</sup> [M + Na<sup>+</sup>] 266.0722, found 266.0727.

The characterization data of **2c** agree with the literature values. <sup>[2]</sup>

### 3,5-Dimethyl-4-thiocyanato-1-(*o*-tolyl)-1*H*-pyrazole (**2d**)

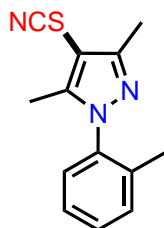

According to the procedure A, **2d** was purified by silica gel chromatography (10% EtOAc/PE). Yellow oil (218.9 mg, yield: 90%). <sup>1</sup>H NMR (400 MHz, CDCl<sub>3</sub>) δ 7.43 – 7.28 (m, 3H), 7.19 (dd, *J* = 7.7, 1.1 Hz, 1H), 2.43 (s, 3H), 2.22 (s, 3H), 2.05 (s, 3H). <sup>13</sup>C NMR (101 MHz, CDCl<sub>3</sub>) δ 151.7, 145.2, 137.8, 135.8, 131.2, 129.9, 127.5, 126.9, 111.0, 95.2, 17.2, 12.1, 10.6. HRMS (ESI) calcd for C<sub>13</sub>H<sub>13</sub>N<sub>3</sub>NaS<sup>+</sup> [M + Na<sup>+</sup>] 266.0722, found 266.0725.

The characterization data of **2d** agree with the literature values. <sup>[2]</sup>

### 1-(4-Methoxyphenyl)-3,5-dimethyl-4-thiocyanato-1*H*-pyrazole (**2e**)

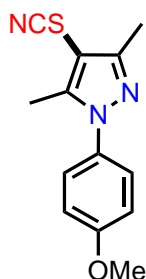

According to the procedure A, **2e** was purified by silica gel chromatography (10% EtOAc/PE). A yellow solid (207.4 mg, yield: 80%). mp: 104-105 °C. <sup>1</sup>H NMR (400 MHz, CDCl<sub>3</sub>) δ 7.33 – 7.27 (m, 2H), 7.01 – 6.96 (m, 2H), 3.86 (s, 3H), 2.42 (s, 3H), 2.38 (s, 3H). <sup>13</sup>C NMR (101 MHz, CDCl<sub>3</sub>) δ 159.7, 151.7, 144.5, 132.0, 126.5, 114.5, 111.0, 95.9, 55.6, 12.0, 11.4. HRMS (ESI) calcd for C<sub>13</sub>H<sub>13</sub>N<sub>3</sub>NaOS<sup>+</sup> [M + Na<sup>+</sup>] 282.0672, found 282.0676.

The characterization data of **2e** agree with the literature values. <sup>[2]</sup>

### 1-(4-Fluorophenyl)-3,5-dimethyl-4-thiocyanato-1*H*-pyrazole (**2f**)

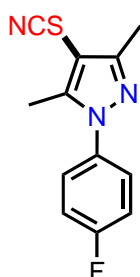

According to the procedure A, **2f** was purified by silica gel chromatography (10% EtOAc/PE). A white solid (225 .0 mg, yield: 91%). mp: 81-82 °C. <sup>1</sup>H NMR (400 MHz, CDCl<sub>3</sub>) δ 7.41 – 7.35 (m, 2H), 7.24 – 7.15 (m, 2H), 2.42 (s, 3H), 2.41 (s, 3H). <sup>13</sup>C NMR (101 MHz, CDCl<sub>3</sub>) δ 162.4 (d, *J*<sub>C-F</sub> = 250.0 Hz), 152.1, 144.5, 135.2 (d, *J*<sub>C-F</sub> = 3.0 Hz), 127.0 (d, *J*<sub>C-F</sub> = 8.1 Hz), 116.4 (d, *J*<sub>C-F</sub> = 23.2 Hz), 110.7, 96.8, 12.0, 11.4. HRMS (ESI) calcd for C<sub>12</sub>H<sub>10</sub>FN<sub>3</sub>NaS<sup>+</sup> [M + Na<sup>+</sup>] 270.0472, found 270.0476.

The characterization data of **2f** agree with the literature values. <sup>[2]</sup>



### 1-(4-Chlorophenyl)-3,5-dimethyl-4-thiocyanato-1*H*-pyrazol (**2g**)

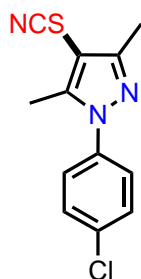

According to the procedure A, **2g** was purified by silica gel chromatography (10% EtOAc/PE). A white solid (226.8 mg, yield: 86%). mp: 95-98 °C. <sup>1</sup>H NMR (400 MHz, CDCl<sub>3</sub>) δ 7.48 (d, *J* = 8.6 Hz, 2H), 7.36 (d, *J* = 8.7 Hz, 2H), 2.44 (s, 3H), 2.42 (s, 3H). <sup>13</sup>C NMR (101 MHz, CDCl<sub>3</sub>) δ 152.3, 144.4, 137.5, 134.5, 129.6, 126.1, 110.7, 97.2, 12.0, 11.6. HRMS (ESI) calcd for C<sub>12</sub>H<sub>10</sub>ClN<sub>3</sub>NaS<sup>+</sup> [M + Na<sup>+</sup>] 252.0566, found 252.0570.

The characterization data of **2g** agree with the literature values. <sup>[2]</sup>

### 1-(4-Bromophenyl)-3,5-dimethyl-4-thiocyanato-1*H*-pyrazole (**2h**)

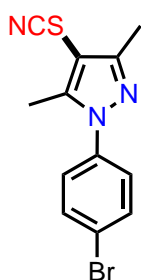

According to the procedure A, **2h** was purified by silica gel chromatography (10% EtOAc/PE). A white solid (271.2 mg, yield: 88%). mp: 111-113 °C. <sup>1</sup>H NMR (400 MHz, CDCl<sub>3</sub>) δ 7.66 – 7.61 (m, 2H), 7.32 – 7.28 (m, 2H), 2.44 (s, 3H), 2.42 (s, 3H). <sup>13</sup>C NMR (101 MHz, CDCl<sub>3</sub>) δ 152.4, 144.4, 138.0, 132.6, 126.4, 122.4, 110.6, 97.3, 12.0, 11.6. HRMS (ESI) calcd for C<sub>12</sub>H<sub>10</sub>BrN<sub>3</sub>NaS<sup>+</sup> [M + Na<sup>+</sup>] 329.9671, found 329.9676.

The characterization data of **2h** agree with the literature values. <sup>[2]</sup>

### 1-(4-Iodophenyl)-3,5-dimethyl-4-thiocyanato-1*H*-pyrazole (**2i**)

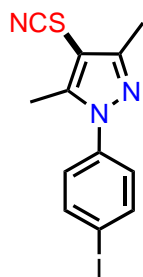

According to the procedure A, **2i** was purified by silica gel chromatography (10% EtOAc/PE). A white solid (284.1 mg, yield: 80%). mp: 103-105 °C. <sup>1</sup>H NMR (400 MHz, CDCl<sub>3</sub>) δ 7.86 – 7.80 (m, 2H), 7.19 – 7.15 (m, 2H), 2.44 (s, 3H), 2.42 (s, 3H). <sup>13</sup>C NMR (101 MHz, CDCl<sub>3</sub>) δ 152.4, 144.3, 138.7, 138.5, 126.5, 110.6, 97.3, 93.8, 12.0, 11.6. HRMS (ESI) calcd for C<sub>12</sub>H<sub>10</sub>IN<sub>3</sub>NaS<sup>+</sup> [M + Na<sup>+</sup>] 377.9532, found 377.9537.

The characterization data of **2i** agree with the literature values. <sup>[2]</sup>

### 3,5-Dimethyl-4-thiocyanato-1-(4-(trifluoromethyl)phenyl)-1*H*-pyrazole (**2j**)

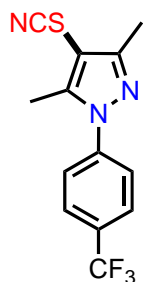

According to the procedure A, **2j** was purified by silica gel chromatography (10% EtOAc/PE). A yellow solid (276.4 mg, yield: 93%). mp: 67-70 °C. <sup>1</sup>H NMR (400 MHz, CDCl<sub>3</sub>) δ 7.77 (d, *J* = 8.4 Hz, 2H), 7.58 (d, *J* = 8.3 Hz, 2H), 2.50 (s, 3H), 2.44 (s, 3H). <sup>13</sup>C NMR (101 MHz, CDCl<sub>3</sub>) δ 152.7, 144.5, 141.8, 130.4 (q, *J*<sub>C-F</sub> = 33.3 Hz), 126.6 (q, *J*<sub>C-F</sub> = 3.7 Hz), 124.5, 123.6 (q, *J*<sub>C-F</sub> = 273.3 Hz), 110.5, 98.1, 12.0, 11.8. HRMS (ESI) calcd for C<sub>13</sub>H<sub>10</sub>F<sub>3</sub>N<sub>3</sub>NaS<sup>+</sup> [M + Na<sup>+</sup>] 320.0440, found 320.0445.

The characterization data of **2j** agree with the literature values. <sup>[2]</sup>

### 3,5-Dimethyl-1-(4-nitrophenyl)-4-thiocyanato-1*H*-pyrazole (**2k**)

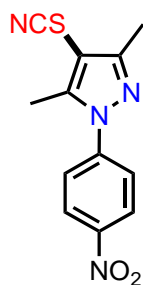

According to the procedure A, **2k** was purified by silica gel chromatography (10% EtOAc/PE). A white solid (170.0 mg, yield: 62%). mp: 80-82 °C. <sup>1</sup>H NMR (400 MHz, CDCl<sub>3</sub>) δ 8.41 – 8.35 (m, 2H), 7.69 – 7.64 (m, 2H), 2.56 (s, 3H), 2.45 (s, 3H). <sup>13</sup>C NMR (101 MHz, CDCl<sub>3</sub>) δ 153.3, 146.8, 144.6, 143.9, 125.0, 124.6, 110.2, 99.3, 12.1, 12.1. HRMS (ESI) calcd for C<sub>12</sub>H<sub>10</sub>N<sub>4</sub>NaO<sub>2</sub>S<sup>+</sup> [M + Na<sup>+</sup>] 297.0417, found 297.0420.

### 3-Methyl-1,5-diphenyl-4-thiocyanato-1*H*-pyrazole (**2l**)

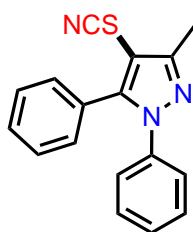

According to the procedure A, **2l** was purified by silica gel chromatography (10% EtOAc/PE). A yellow solid (174.8 mg, yield: 60%). mp: 50-54 °C. <sup>1</sup>H NMR (400 MHz, CDCl<sub>3</sub>) δ 7.46 – 7.38 (m, 3H), 7.34 – 7.25 (m, 5H), 7.24 – 7.18 (m, 2H), 2.54 (s, 3H). <sup>13</sup>C NMR (101 MHz, CDCl<sub>3</sub>) δ 152.8, 147.0, 139.2, 130.0, 129.7, 129.1, 128.8, 128.1, 127.9, 124.9, 111.2, 97.7, 12.2. HRMS (ESI) calcd for C<sub>17</sub>H<sub>13</sub>N<sub>3</sub>NaS<sup>+</sup> [M + Na<sup>+</sup>] 314.0722, found 314.0726.

### 5-(4-Methoxyphenyl)-3-methyl-1-phenyl-4-thiocyanato-1*H*-pyrazol (**2m**)

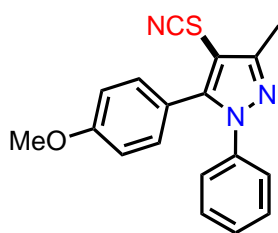

According to the procedure A, **2m** was purified by silica gel chromatography (10%

EtOAc/PE). A white solid (298.9 mg, yield: 93%). mp: 95-98 °C. <sup>1</sup>H NMR (400 MHz, CDCl<sub>3</sub>) δ 7.32 (q, *J* = 5.5 Hz, 3H), 7.25 – 7.17 (m, 4H), 6.95 – 6.90 (m, 2H), 3.84 (s, 3H), 2.53 (s, 3H). <sup>13</sup>C NMR (101 MHz, CDCl<sub>3</sub>) δ 160.5, 152.7, 147.0, 139.4, 131.3, 129.1, 128.0, 125.0, 119.9, 114.3, 111.4, 97.3, 55.3, 12.2. HRMS (ESI) calcd for C<sub>18</sub>H<sub>15</sub>N<sub>3</sub>NaOS<sup>+</sup> [M + Na<sup>+</sup>] 344.0828, found 344.0820.

### 1,3,5-Triphenyl-4-thiocyanato-1*H*-pyrazole (2n)

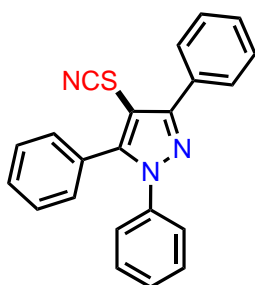

According to the procedure A, **2n** was purified by silica gel chromatography (10% EtOAc/PE). A yellow solid (141.37 mg, yield: 40%). mp: 110-112 °C. <sup>1</sup>H NMR (400 MHz, CDCl<sub>3</sub>) δ 8.04 – 7.96 (m, 2H), 7.58 – 7.45 (m, 6H), 7.40 – 7.31 (m, 7H). <sup>13</sup>C NMR (101 MHz, CDCl<sub>3</sub>) δ 154.3, 148.6, 139.2, 131.0, 130.2, 129.9, 129.2, 129.1, 128.9, 128.7, 128.5, 128.3, 127.8, 125.0, 111.8, 96.7. HRMS (ESI) calcd for C<sub>22</sub>H<sub>15</sub>N<sub>3</sub>NaS<sup>+</sup> [M + Na<sup>+</sup>] 376.0879, found 376.0875.

The characterization data of **2n** agree with the literature values. <sup>[3]</sup>

### 1-(*tert*-Butyl)-3-methyl-5-phenyl-4-thiocyanato-1*H*-pyrazole (2o)

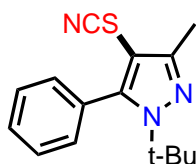

According to the procedure A, **2o** was purified by silica gel chromatography (10% EtOAc/PE). A yellow solid (173.68 mg, yield: 64%). mp: 99-100 °C. <sup>1</sup>H NMR (400 MHz, CDCl<sub>3</sub>) δ 7.52 – 7.46 (m, 3H), 7.33 – 7.29 (m, 2H), 2.42 (s, 3H), 1.43 (s, 9H). <sup>13</sup>C NMR (101 MHz, CDCl<sub>3</sub>) δ 149.1, 147.5, 131.2, 130.4, 129.6, 128.4, 111.6, 97.9, 62.7, 30.9, 12.1. HRMS (ESI) calcd for C<sub>15</sub>H<sub>17</sub>N<sub>3</sub>NaS<sup>+</sup> [M + Na<sup>+</sup>] 294.1035, found 294.1039.

### 1-Phenyl-4-thiocyanato-1*H*-pyrazole (**2p**)

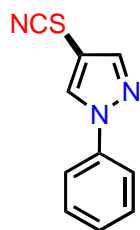

According to the procedure A, **2p** was purified by silica gel chromatography (5% EtOAc/PE). A white solid (175.0 mg, yield: 87%). mp: 61-62 °C. <sup>1</sup>H NMR (400 MHz, CDCl<sub>3</sub>) δ 8.20 (s, 1H), 7.90 (s, 1H), 7.67 (d, *J* = 7.9 Hz, 2H), 7.50 (t, *J* = 7.9 Hz, 2H), 7.39 (t, *J* = 7.4 Hz, 1H). <sup>13</sup>C NMR (101 MHz, CDCl<sub>3</sub>) δ 144.3, 139.2, 131.8, 129.7, 128.0, 119.6, 110.8, 100.0. HRMS (ESI) calcd for C<sub>10</sub>H<sub>7</sub>N<sub>3</sub>NaS<sup>+</sup> [*M* + Na<sup>+</sup>] 224.0253, found 224.0249.

### 3-Methyl-1-phenyl-4-thiocyanato-1*H*-pyrazol-5-ol (**2q**)

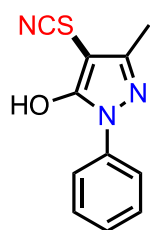

According to the procedure A, **2q** was purified by silica gel chromatography (1% MeOH/CH<sub>2</sub>Cl<sub>2</sub>). A white solid (170.46 mg, yield: 80%). mp: 110-112 °C. <sup>1</sup>H NMR (400 MHz, CDCl<sub>3</sub>) δ 7.37 (d, *J* = 7.6 Hz, 2H), 7.28 (s, 1H), 7.22 (dd, *J* = 13.6, 6.6 Hz, 2H), 2.33 (s, 3H). <sup>13</sup>C NMR (101 MHz, CDCl<sub>3</sub>) δ 160.3, 151.5, 135.0, 129.2, 127.5, 122.1, 110.6, 82.5, 11.6. HRMS (ESI) calcd for C<sub>11</sub>H<sub>9</sub>N<sub>3</sub>NaOS<sup>+</sup> [*M* + Na<sup>+</sup>] 254.0359, found 254.0355.

The characterization data of **2q** agree with the literature values. <sup>[4]</sup>

### 3,5-Dimethyl-1-phenyl-4-((trifluoromethyl)thio)-1*H*-pyrazole (**2r**)

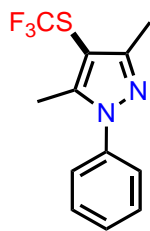

Following the reported procedure, <sup>[5]</sup> **2r** was purified by silica gel chromatography (10% EtOAc/PE). Colorless oil (171.54 mg, yield: 63%). <sup>1</sup>H NMR (400 MHz, CDCl<sub>3</sub>) δ 7.51 – 7.38 (m, 5H), 2.40 (s, 3H), 2.39 (s, 3H). <sup>13</sup>C NMR (101 MHz, CDCl<sub>3</sub>) δ 153.8, 145.9, 139.4, 129.5 (q, *J*<sub>C-F</sub> = 311.08 Hz), 129.3, 128.3, 124.9, 99.2, 11.9, 11.4. HRMS (ESI) calcd for C<sub>12</sub>H<sub>11</sub>F<sub>3</sub>N<sub>2</sub>NaS<sup>+</sup> [*M* + Na<sup>+</sup>] 295.0487, found 295.0485.

The characterization data of **2r** agree with the literature values. <sup>[2]</sup>

### 3,5-Dimethyl-4-(methylthio)-1-phenyl-1*H*-pyrazole (**2s**)

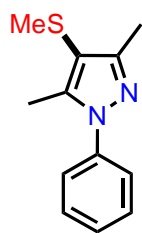

Following the reported procedure, <sup>[6]</sup> **2s** was purified by silica gel chromatography (10% EtOAc/PE). A white solid (122.25 mg, yield: 56%). mp: 95-96 °C. <sup>1</sup>H NMR (400 MHz, CDCl<sub>3</sub>) δ 7.47 – 7.43 (m, 2H), 7.43 – 7.39 (m, 2H), 7.38 – 7.32 (m, 1H), 2.38 (s, 6H), 2.20 (s, 3H). <sup>13</sup>C NMR (101 MHz, CDCl<sub>3</sub>) δ 152.2, 142.6, 139.9, 129.1, 127.6, 124.7, 110.9, 19.9, 12.2, 11.6. HRMS (ESI) calcd for C<sub>12</sub>H<sub>14</sub>N<sub>2</sub>NaS<sup>+</sup> [*M* + Na<sup>+</sup>] 241.0770, found 241.0773.

The characterization data of **2s** agree with the literature values. <sup>[2]</sup>

### 3,5-Dimethyl-1-phenyl -4-selenocyanato-1*H*-pyrazole (3a)

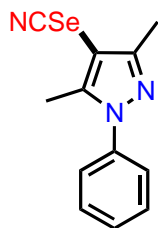

According to the procedure B, **3a** was purified by silica gel chromatography (15% EtOAc/PE). A white solid (226.5 mg, yield: 82%). mp: 82-84 °C. <sup>1</sup>H NMR (400 MHz, CDCl<sub>3</sub>) δ 7.50 (t, *J* = 7.4 Hz, 2H), 7.46 – 7.37 (m, 3H), 2.45 (d, *J* = 6.1 Hz, 6H). <sup>13</sup>C NMR (101 MHz, CDCl<sub>3</sub>) δ 152.4, 144.6, 139.2, 129.4, 128.6, 125.1, 100.9, 94.7, 12.9, 12.4. HRMS (ESI) calcd for C<sub>12</sub>H<sub>11</sub>N<sub>3</sub>NaSe<sup>+</sup> [*M* + Na<sup>+</sup>] 300.0010, found 300.0018.

The characterization data of **3a** agree with the literature values. <sup>[7]</sup>

### 3,5-Dimethyl-4- selenocyanato-1-(*p*-tolyl)-1*H*-pyrazole (3b)

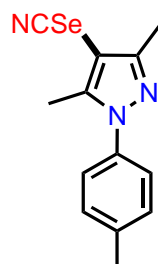

According to the procedure B, **3b** was purified by silica gel chromatography (15% EtOAc/PE). A white solid (252.5 mg, yield: 87%). mp: 77-79 °C. <sup>1</sup>H NMR (400 MHz, CDCl<sub>3</sub>) δ 7.28 (s, 4H), 2.47 – 2.40 (m, 9H). <sup>13</sup>C NMR (101 MHz, CDCl<sub>3</sub>) δ 152.1, 144.6, 138.7, 136.7, 129.9, 124.9, 101.0, 94.4, 21.2, 12.8, 12.3. HRMS (ESI) calcd for C<sub>13</sub>H<sub>13</sub>N<sub>3</sub>NaSe<sup>+</sup> [*M* + Na<sup>+</sup>] 314.0167, found 314.0170.

### 3,5-Dimethyl-4-selenocyanato-1-(*m*-tolyl)-1*H*-pyrazole (3c)

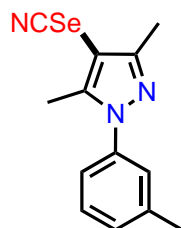

According to the procedure B, **3c** was purified by silica gel chromatography (15%

EtOAc/PE). Yellow oil (258.3 mg, yield: 89%).  $^1\text{H}$  NMR (400 MHz,  $\text{CDCl}_3$ )  $\delta$  7.38 – 7.33 (m, 1H), 7.25 – 7.21 (m, 2H), 7.16 (d,  $J$  = 8.0 Hz, 1H), 2.44 (s, 3H), 2.43 (s, 3H), 2.41 (s, 3H).  $^{13}\text{C}$  NMR (101 MHz,  $\text{CDCl}_3$ )  $\delta$  152.2, 144.5, 139.6, 139.1, 129.4, 129.0, 125.8, 122.0, 101.0, 94.5, 21.4, 12.9, 12.4. HRMS (ESI) calcd for  $\text{C}_{13}\text{H}_{13}\text{N}_3\text{NaSe}^+$  [ $\text{M} + \text{Na}^+$ ] 314.0167, found 314.0163.

### 3,5-Dimethyl-4-selenocyanato-1-(*o*-tolyl)-1*H*-pyrazole (3d)

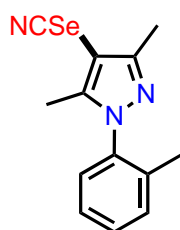

According to the procedure B, **3d** was purified by silica gel chromatography (15% EtOAc/PE). Yellow oil (261.2 mg, yield: 90%).  $^1\text{H}$  NMR (400 MHz,  $\text{CDCl}_3$ )  $\delta$  7.41 – 7.27 (m, 3H), 7.19 (dd,  $J$  = 7.7, 1.0 Hz, 1H), 2.43 (s, 3H), 2.23 (s, 3H), 2.04 (s, 3H).  $^{13}\text{C}$  NMR (101 MHz,  $\text{CDCl}_3$ )  $\delta$  152.1, 145.5, 138.0, 135.8, 131.2, 129.8, 127.5, 126.9, 101.1, 93.1, 17.2, 12.9, 11.4. HRMS (ESI) calcd for  $\text{C}_{13}\text{H}_{13}\text{N}_3\text{NaSe}^+$  [ $\text{M} + \text{Na}^+$ ] 314.0167, found 314.0162.

### 1-(4-Methoxyphenyl)-3,5-dimethyl-4-selenocyanato-1*H*-pyrazole (3e)

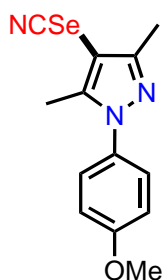

According to the procedure B, **3e** was purified by silica gel chromatography (15% EtOAc/PE). A white solid (225.0 mg, yield: 80%). mp: 82-85 °C.  $^1\text{H}$  NMR (400 MHz,  $\text{CDCl}_3$ )  $\delta$  7.33 – 7.28 (m, 2H), 7.01 – 6.96 (m, 2H), 3.86 (s, 3H), 2.42 (s, 3H), 2.40 (s, 3H).  $^{13}\text{C}$  NMR (101 MHz,  $\text{CDCl}_3$ )  $\delta$  159.6, 152.0, 144.7, 132.3, 126.6, 114.4, 101.0, 94.0, 55.6, 12.8, 12.2. HRMS (ESI) calcd for  $\text{C}_{13}\text{H}_{13}\text{N}_3\text{NaOSe}^+$  [ $\text{M} + \text{Na}^+$ ] 330.0116, found 330.0110.



### 1-(4-Fluorophenyl)-3,5-dimethyl-4-selenocyanato-1*H*-pyrazol (3f)

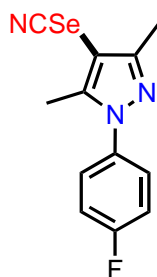

According to the procedure B, **3f** was purified by silica gel chromatography (15% EtOAc/PE). A white solid (232.4 mg, yield: 79%). mp: 75-77 °C. <sup>1</sup>H NMR (400 MHz, CDCl<sub>3</sub>) δ 7.38 (ddt, *J* = 7.9, 5.3, 2.6 Hz, 2H), 7.22 – 7.15 (m, 2H), 2.43 (s, 6H). <sup>13</sup>C NMR (101 MHz, CDCl<sub>3</sub>) δ 162.3 (d, *J*<sub>C-F</sub> = 250.2 Hz), 152.4, 144.7, 135.3 (d, *J*<sub>C-F</sub> = 3.2 Hz), 127.1 (d, *J*<sub>C-F</sub> = 8.8 Hz), 116.4 (d, *J*<sub>C-F</sub> = 23.1 Hz), 100.8, 94.8, 12.8, 12.3. HRMS (ESI) calcd for C<sub>12</sub>H<sub>10</sub>FN<sub>3</sub>NaSe<sup>+</sup> [*M* + Na<sup>+</sup>] 317.9916, found 317.9910.

### 1-(4-Chlorophenyl)-3,5-dimethyl-4-selenocyanato-1*H*-pyrazole (3g)

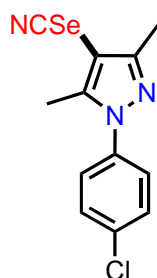

According to the procedure B, **3g** was purified by silica gel chromatography (15% EtOAc/PE). A white solid (279.6 mg, yield: 90%). mp: 95-98 °C. <sup>1</sup>H NMR (400 MHz, CDCl<sub>3</sub>) δ 7.51 – 7.45 (m, 2H), 7.41 – 7.33 (m, 2H), 2.46 (s, 3H), 2.43 (s, 3H). <sup>13</sup>C NMR (101 MHz, CDCl<sub>3</sub>) δ 152.7, 144.6, 137.7, 134.4, 129.6, 126.2, 100.7, 95.2, 12.9, 12.4. HRMS (ESI) calcd for C<sub>12</sub>H<sub>10</sub>ClN<sub>3</sub>NaSe<sup>+</sup> [*M* + Na<sup>+</sup>] 333.9621, found 323.9626.

### 1-(4-Bromophenyl)-3,5-dimethyl-4-selenocyanato-1*H*-pyrazole (**3h**)

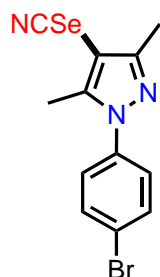

According to the procedure B, **3h** was purified by silica gel chromatography (15% EtOAc/PE). A white solid (269.9 mg, yield: 76%). mp: 96-98 °C. <sup>1</sup>H NMR (400 MHz, CDCl<sub>3</sub>) δ 7.65 – 7.61 (m, 2H), 7.34 – 7.28 (m, 2H), 2.46 (s, 3H), 2.43 (s, 3H). <sup>13</sup>C NMR (101 MHz, CDCl<sub>3</sub>) δ 152.7, 144.6, 138.2, 132.5, 126.4, 122.4, 100.7, 95.3, 12.9, 12.5. HRMS (ESI) calcd for C<sub>12</sub>H<sub>10</sub>BrN<sub>3</sub>NaSe<sup>+</sup> [M + Na<sup>+</sup>] 377.9116, found 377.9110.

### 1-(4-Iodophenyl)-3,5-dimethyl-4-selenocyanato-1*H*-pyrazole (**3i**)

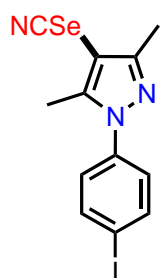

According to the procedure B, **3i** was purified by silica gel chromatography (15% EtOAc/PE). A white solid (301.6 mg, yield: 75%). mp: 85-87 °C. <sup>1</sup>H NMR (400 MHz, CDCl<sub>3</sub>) δ 7.86 – 7.80 (m, 2H), 7.20 – 7.13 (m, 2H), 2.46 (s, 3H), 2.43 (s, 3H). <sup>13</sup>C NMR (101 MHz, CDCl<sub>3</sub>) δ 152.7, 144.6, 138.9, 138.5, 126.6, 100.7, 95.4, 93.7, 12.9, 12.5. HRMS (ESI) calcd for C<sub>12</sub>H<sub>10</sub>IN<sub>3</sub>NaSe<sup>+</sup> [M + Na<sup>+</sup>] 425.8977, found 425.8974.

### 3,5-Dimethyl-4-selenocyanato-1-(4-(trifluoromethyl)phenyl)-1*H*-pyrazole (**3j**)

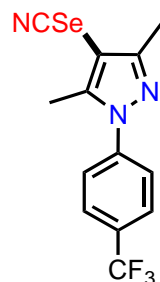

According to the procedure B, **3j** was purified by silica gel chromatography (15%

EtOAc/PE). A yellow solid (285.7 mg, yield: 83%). mp: 92-95 °C.  $^1\text{H}$  NMR (400 MHz,  $\text{CDCl}_3$ )  $\delta$  7.77 (d,  $J$  = 8.3 Hz, 2H), 7.58 (d,  $J$  = 8.2 Hz, 2H), 2.52 (s, 3H), 2.44 (s, 3H).  $^{13}\text{C}$  NMR (101 MHz,  $\text{CDCl}_3$ )  $\delta$  153.1, 144.7, 142.0, 130.4 (q,  $J_{\text{C-F}}$  = 33.1 Hz), 126.6 (q,  $J_{\text{C-F}}$  = 3.7 Hz), 124.94 (q,  $J_{\text{C-F}}$  = 273.3 Hz), 124.9, 100.6, 96.1, 12.9, 12.7. HRMS (ESI) calcd for  $\text{C}_{13}\text{H}_{10}\text{F}_3\text{N}_3\text{NaSe}^+$  [ $\text{M} + \text{Na}^+$ ] 367.9884, found 367.9880.

### 3,5-Dimethyl-1-(4-nitrophenyl)-4-selenocyanato-1H-pyrazole (3k)

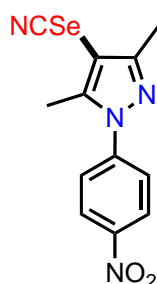

According to the procedure B, **3k** was purified by silica gel chromatography (15% EtOAc/PE). A white solid (183.1 mg, yield: 57%). mp: 140-142 °C.  $^1\text{H}$  NMR (400 MHz,  $\text{CDCl}_3$ )  $\delta$  8.41 – 8.36 (m, 2H), 7.69 – 7.65 (m, 2H), 2.58 (s, 3H), 2.46 (s, 3H).  $^{13}\text{C}$  NMR (101 MHz,  $\text{CDCl}_3$ )  $\delta$  153.7, 146.8, 144.9, 144.0, 124.9, 124.7, 100.3, 97.3, 13.0, 12.9. HRMS (ESI) calcd for  $\text{C}_{12}\text{H}_{10}\text{N}_4\text{NaO}_2\text{Se}^+$  [ $\text{M} + \text{Na}^+$ ] 344.9861, found 344.9868.

### 1-(3,5-Dichlorophenyl)-3,5-dimethyl-4-selenocyanato-1H-pyrazole (3l)

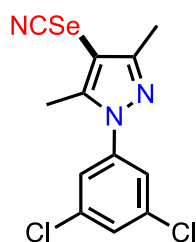

According to the procedure B, **3l** was purified by silica gel chromatography (15% EtOAc/PE). A yellow solid (296.8 mg, yield: 82%). mp: 104-106 °C.  $^1\text{H}$  NMR (400 MHz,  $\text{CDCl}_3$ )  $\delta$  7.42 (t,  $J$  = 1.8 Hz, 1H), 7.37 (d,  $J$  = 1.8 Hz, 2H), 2.51 (s, 3H), 2.42 (s, 3H).  $^{13}\text{C}$  NMR (101 MHz,  $\text{CDCl}_3$ )  $\delta$  153.2, 144.7, 140.7, 135.7, 128.5, 123.3, 100.4, 96.2, 12.9, 12.7. HRMS (ESI) calcd for  $\text{C}_{12}\text{H}_9\text{Cl}_2\text{N}_3\text{NaSe}^+$  [ $\text{M} + \text{Na}^+$ ] 367.9231, found 367.9235.

### 2-(3,5-Dimethyl-4-selenocyanato-1*H*-pyrazol-1-yl)pyrazine (3m)

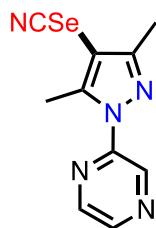

According to the procedure B, **3m** was purified by silica gel chromatography (15% EtOAc/PE). A white solid (239.2 mg, yield: 86%). mp: 95-98 °C. <sup>1</sup>H NMR (400 MHz, CDCl<sub>3</sub>) δ 9.25 (d, *J* = 1.2 Hz, 1H), 8.52 (d, *J* = 2.5 Hz, 1H), 8.40 (dd, *J* = 2.4, 1.5 Hz, 1H), 2.83 (s, 3H), 2.47 (s, 3H). <sup>13</sup>C NMR (101 MHz, CDCl<sub>3</sub>) δ 153.7, 149.0, 147.0, 142.1, 141.2, 138.6, 100.3, 98.4, 14.3, 13.1. HRMS (ESI) calcd for C<sub>10</sub>H<sub>9</sub>N<sub>5</sub>NaSe<sup>+</sup> [M + Na<sup>+</sup>] 301.9915, found 301.9918.

### 1,3,5-Triphenyl-4-selenocyanato-1*H*-pyrazole (3n)

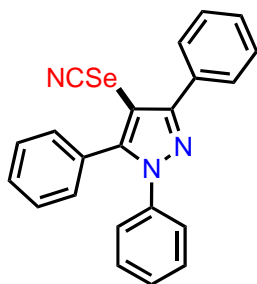

According to the procedure B, **3n** was purified by silica gel chromatography (15% EtOAc/PE). A white solid (168.1 mg, yield: 42%). mp: 99-100 °C. <sup>1</sup>H NMR (400 MHz, CDCl<sub>3</sub>) δ 7.97 – 7.92 (m, 2H), 7.56 – 7.41 (m, 6H), 7.40 – 7.28 (m, 7H). <sup>13</sup>C NMR (101 MHz, CDCl<sub>3</sub>) δ 154.9, 149.0, 139.3, 131.5, 130.4, 129.7, 129.1, 129.0, 128.8, 128.8, 128.6, 128.2, 125.0, 102.0, 94.3. HRMS (ESI) calcd for C<sub>22</sub>H<sub>15</sub>N<sub>3</sub>NaSe<sup>+</sup> [M + Na<sup>+</sup>] 424.0323, found 424.0326.

### 1-(*tert*-Butyl)-3-methyl-5-phenyl-4-selenocyanato-1*H*-pyrazole (3o)

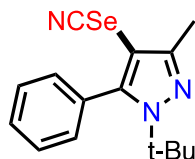

According to the procedure B, **3o** was purified by silica gel chromatography (15%

EtOAc/PE). A white solid (206.9 mg, yield: 65%). mp: 97-99 °C.  $^1\text{H}$  NMR (400 MHz,  $\text{CDCl}_3$ )  $\delta$  7.50 – 7.45 (m, 3H), 7.32 – 7.26 (m, 2H), 2.42 (s, 3H), 1.43 (s, 9H).  $^{13}\text{C}$  NMR (101 MHz,  $\text{CDCl}_3$ )  $\delta$  149.3, 147.8, 132.1, 130.5, 129.4, 128.3, 101.8, 96.2, 62.5, 31.0, 12.9. HRMS (ESI) calcd for  $\text{C}_{15}\text{H}_{17}\text{N}_3\text{NaSe}^+$  [ $\text{M} + \text{Na}^+$ ] 342.0480, found 342.0485.

### 1-Phenyl-4-selenocyanato-1*H*-pyrazole (**3p**)

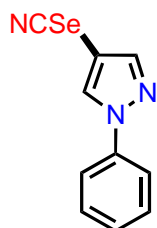

According to the procedure B, **3p** was purified by silica gel chromatography (10% EtOAc/PE). A white solid (196.0 mg, yield: 79%). mp: 62-63 °C.  $^1\text{H}$  NMR (400 MHz,  $\text{CDCl}_3$ )  $\delta$  8.20 (s, 1H), 7.90 (s, 1H), 7.68 (d,  $J$  = 7.7 Hz, 2H), 7.50 (t,  $J$  = 7.9 Hz, 2H), 7.38 (t,  $J$  = 7.4 Hz, 1H).  $^{13}\text{C}$  NMR (101 MHz,  $\text{CDCl}_3$ )  $\delta$  145.5, 139.2, 132.9, 129.7, 127.9, 119.7, 100.9, 94.7. HRMS (ESI) calcd for  $\text{C}_{10}\text{H}_7\text{N}_3\text{NaSe}^+$  [ $\text{M} + \text{Na}^+$ ] 271.9697, found 271.9700.

### 3,5-Dimethyl-1-phenyl-4-((trifluoromethyl)selanyl)-1*H*-pyrazole (**3q**)

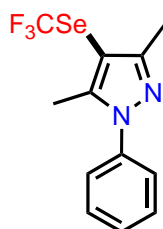

Following the reported procedure,<sup>[5]</sup> **3q** was purified by silica gel chromatography (20% EtOAc/PE). A white solid (191.5 mg, yield: 60%). mp: 89-91 °C.  $^1\text{H}$  NMR (400 MHz,  $\text{CDCl}_3$ )  $\delta$  7.53 – 7.37 (m, 5H), 2.43 (s, 3H), 2.41 (s, 3H).  $^{13}\text{C}$  NMR (151 MHz,  $\text{CDCl}_3$ )  $\delta$  153.6, 145.5, 139.6, 129.2, 128.2, 123.5, 112.4 (q,  $J$  = 335.2 Hz), 97.8, 12.7, 12.3. HRMS (ESI) calcd for  $\text{C}_{12}\text{H}_{11}\text{F}_3\text{N}_2\text{NaSe}^+$  [ $\text{M} + \text{Na}^+$ ] 342.9932, found 342.9936.

### 3,5-Dimethyl-4-(methylselanyl)-1-phenyl-1*H*-pyrazole (**3r**)

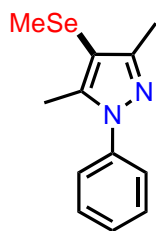

Following the reported procedure, <sup>[6]</sup> **3r** was purified by silica gel chromatography (20% EtOAc/PE). A white solid (164.4 mg, yield: 62%). mp: 100-102 °C. <sup>1</sup>H NMR (400 MHz, CDCl<sub>3</sub>) δ 7.46 (dd, *J* = 8.2, 6.8 Hz, 2H), 7.42 (dd, *J* = 5.6, 3.0 Hz, 2H), 7.39 – 7.33 (m, 1H), 2.41 (s, 3H), 2.40 (s, 3H), 2.06 (s, 3H). <sup>13</sup>C NMR (101 MHz, CDCl<sub>3</sub>) δ 152.5, 142.9, 139.9, 129.1, 127.7, 124.8, 104.3, 13.0, 12.5, 8.8. HRMS (ESI) calcd for C<sub>12</sub>H<sub>14</sub>N<sub>2</sub>NaSe<sup>+</sup> [*M* + Na<sup>+</sup>] 289.0214, found 289.0218.

The characterization data of **3r** agree with the literature values. <sup>[8]</sup>

## IV. References

- [1] Reddy, C. S., Devi, M. V., Sunitha, M., Nagaraj, A. *Chem. Pharm. Bull.* **2010**, 58, 1622-1626.
- [2] He, W. B., Zhao, S. J., Chen, J. Y., Jiang, J., Chen, X., Xu, X., He, W. M. *Chin. Chem. Lett.* **2023**, 34, 107640.
- [3] Songsichan, T., Katrun, P., Khaikate, O., Soorukram, D., Pohmakotr, M., Reutrakul, V., Kuhakarn, C. *SynOpen* **2018**, 02, 0006-0016.
- [4] Pan, J., Liu, C., Wang, J., Dai, Y., Wang, S., Guo, C. *Tetrahedron Lett.* **2021**, 77, 153253.
- [5] Jouvin, K., Matheis, C., Goossen, L. J. *Chem. Eur. J.* **2015**, 21, 14324-14327.
- [6] Adams, R., Bramlet, H. B., Tendick, F. H. *J. Am. Chem. Soc.* **1920**, 42, 2369-2374.
- [7] Ali, D., Mondal, N., Panday, A. K., Choudhury, L. H. *ACS Omega* **2023**, 8, 25349-25357.
- [8] Wu, Y., Chen, J. Y., Ning, J., Jiang, X., Deng, J., Deng, Y., Xu, R., He, W. M. *Green Chem.* **2021**, 23, 3950-3954.

## V. NMR Spectra of products

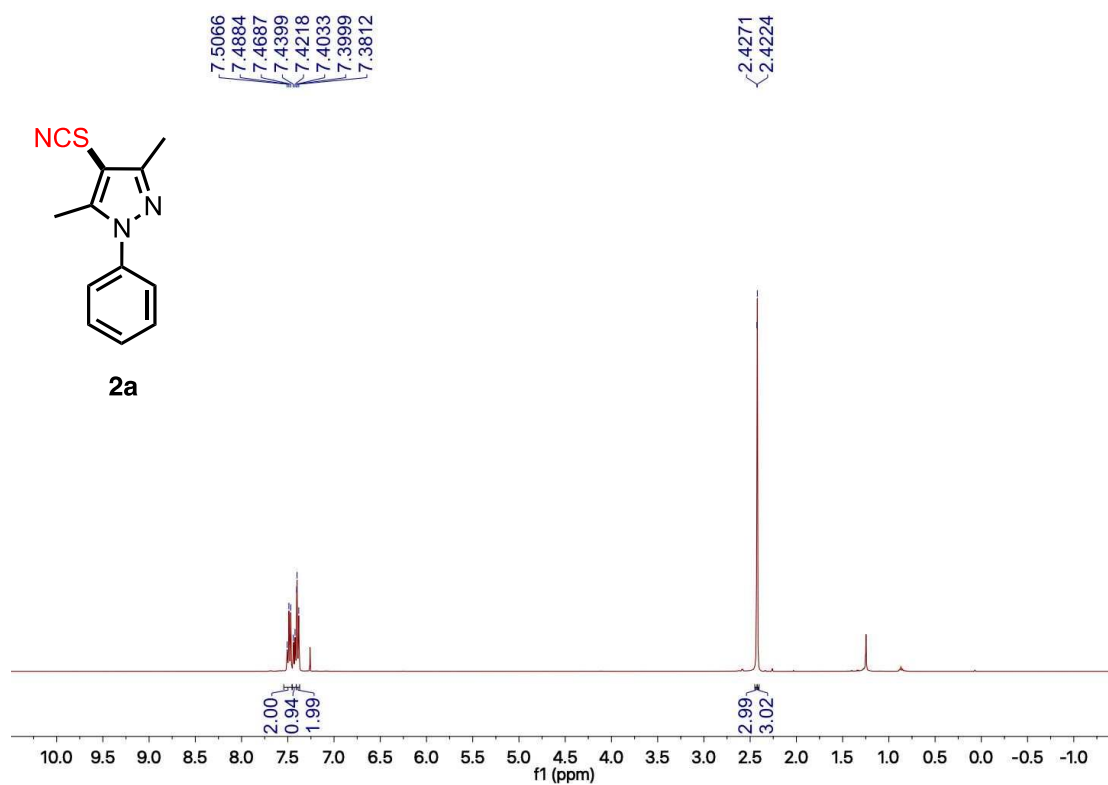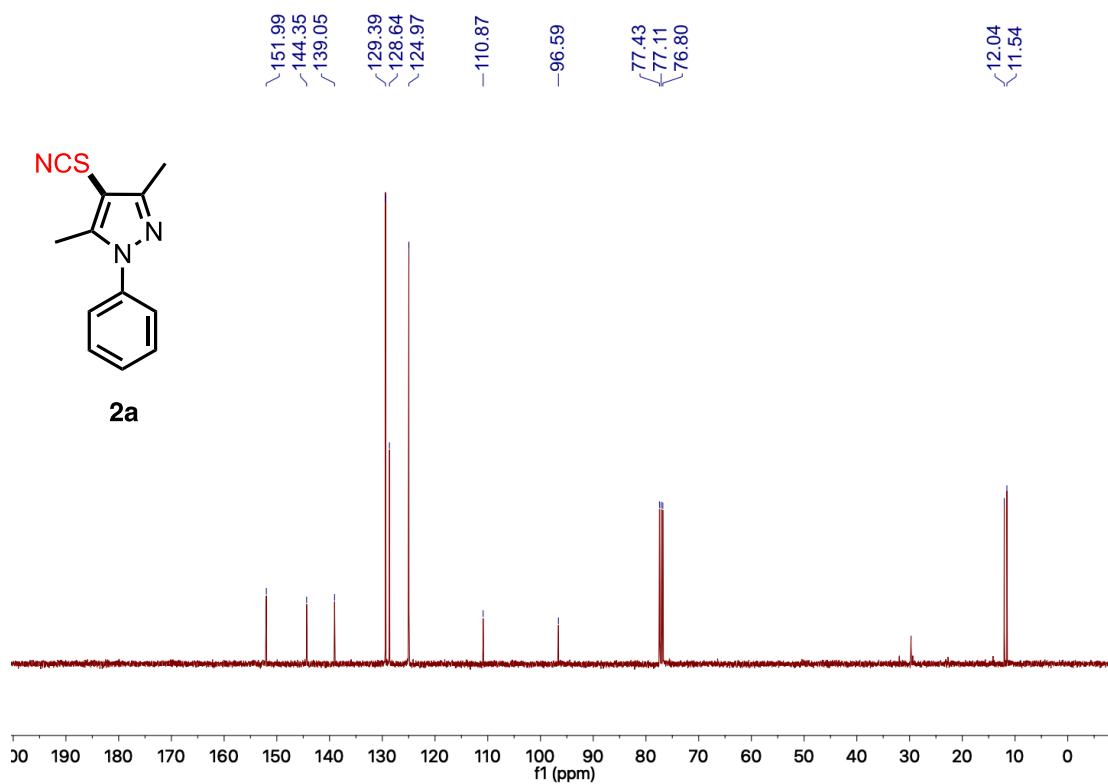

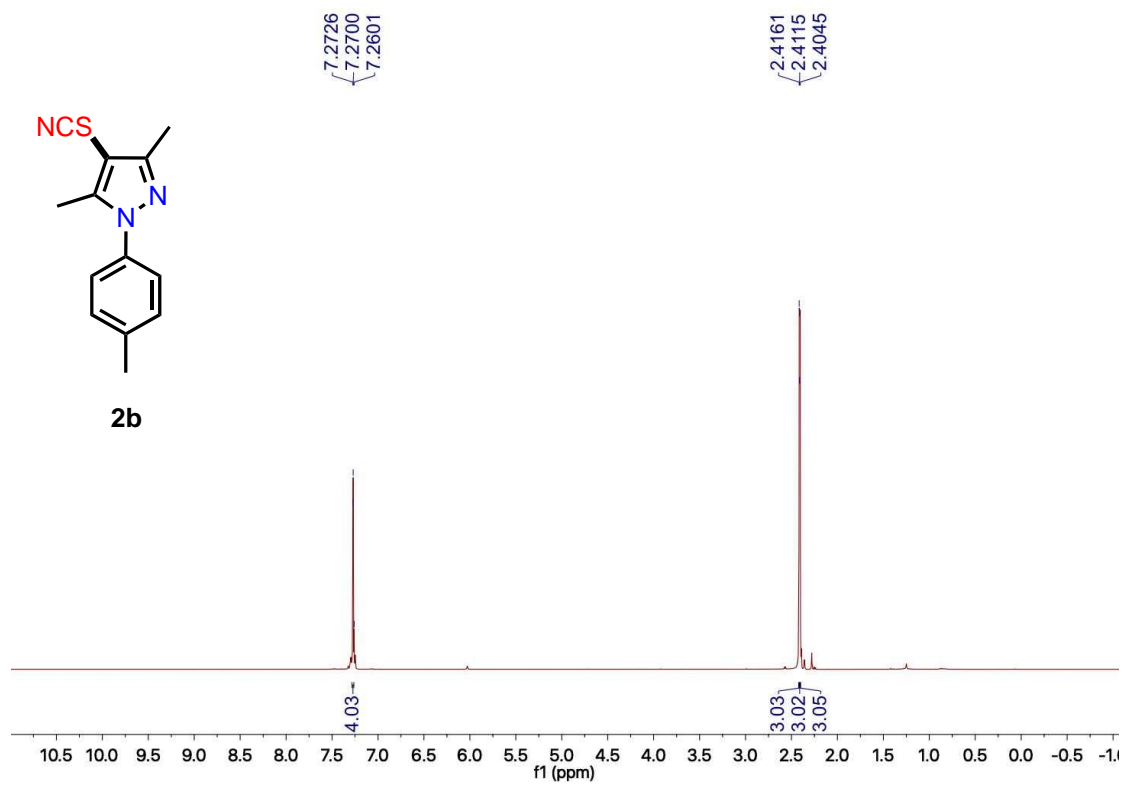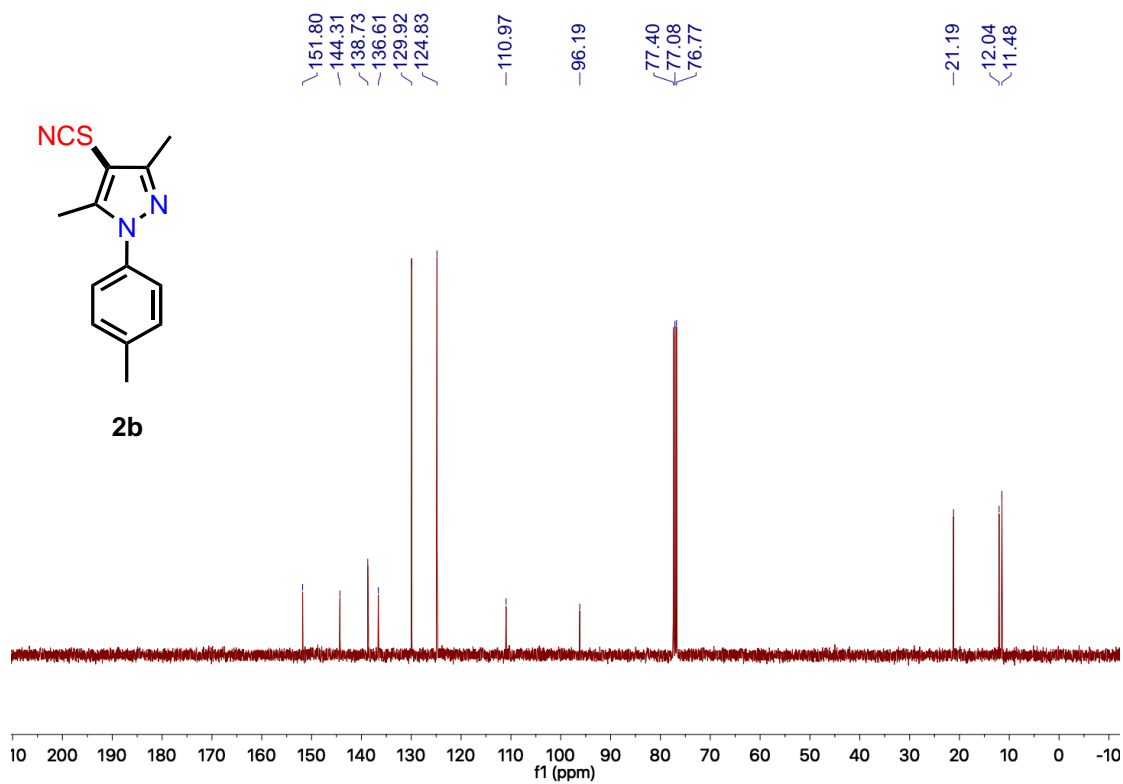



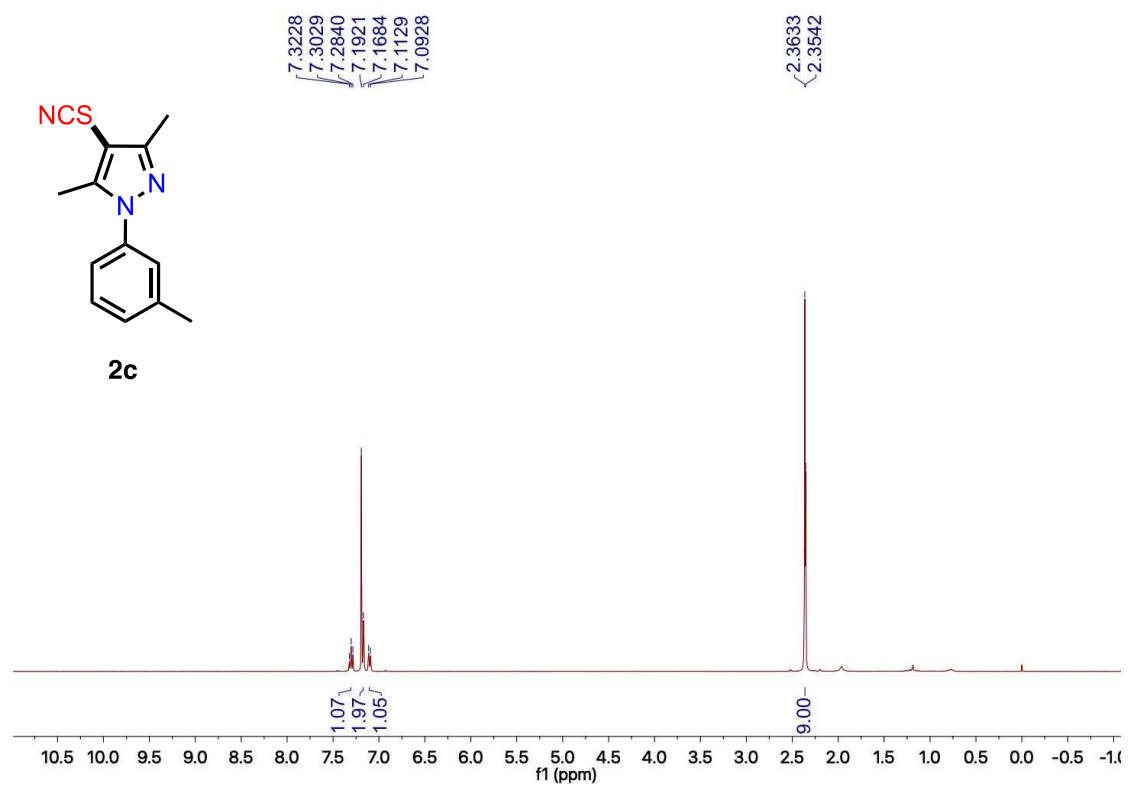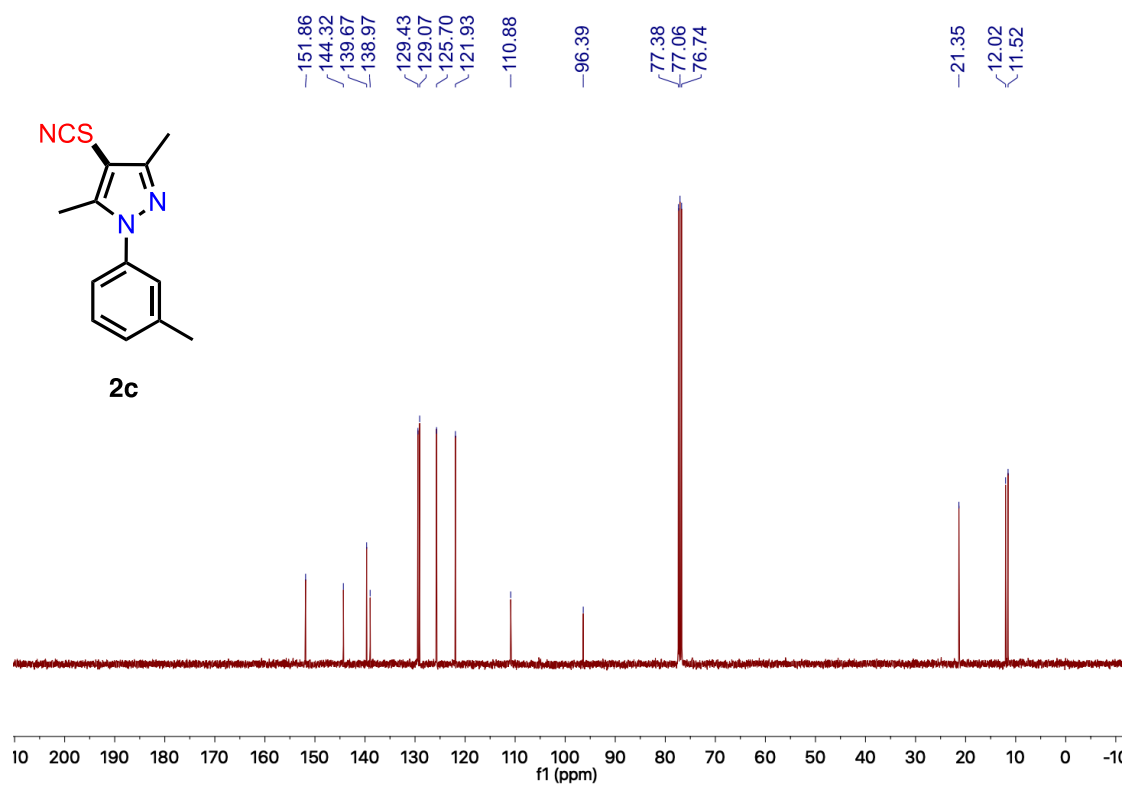

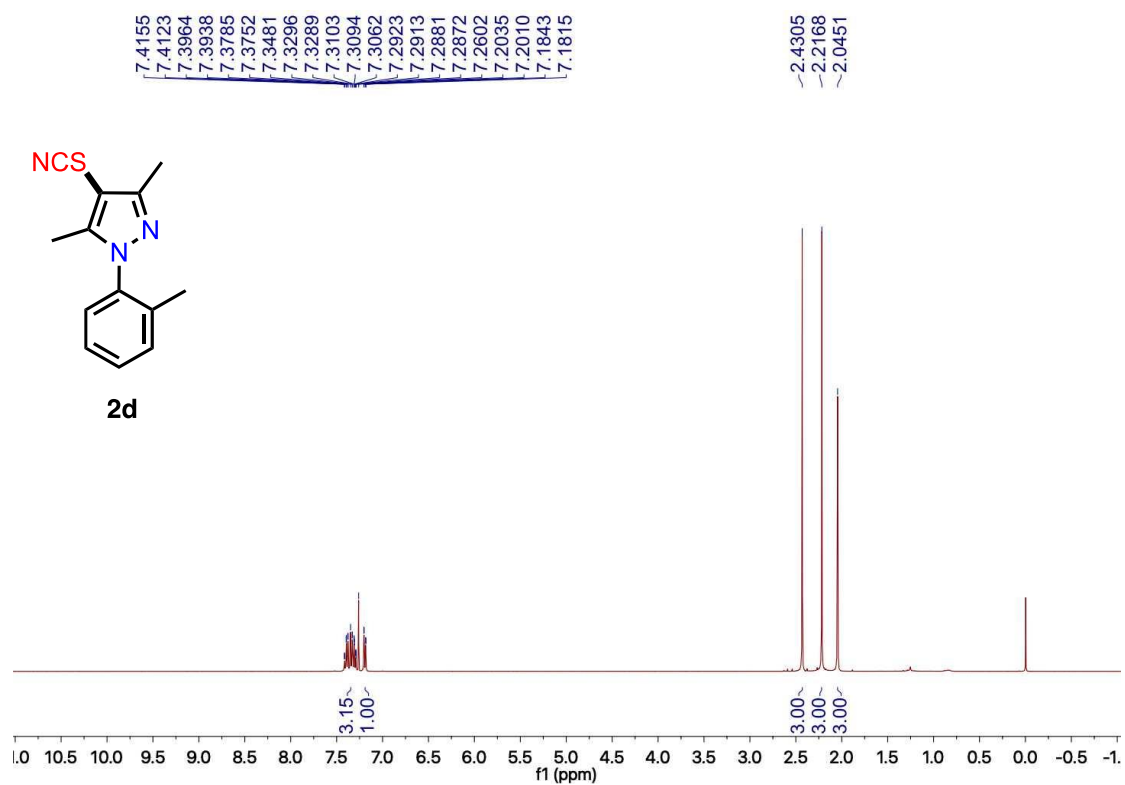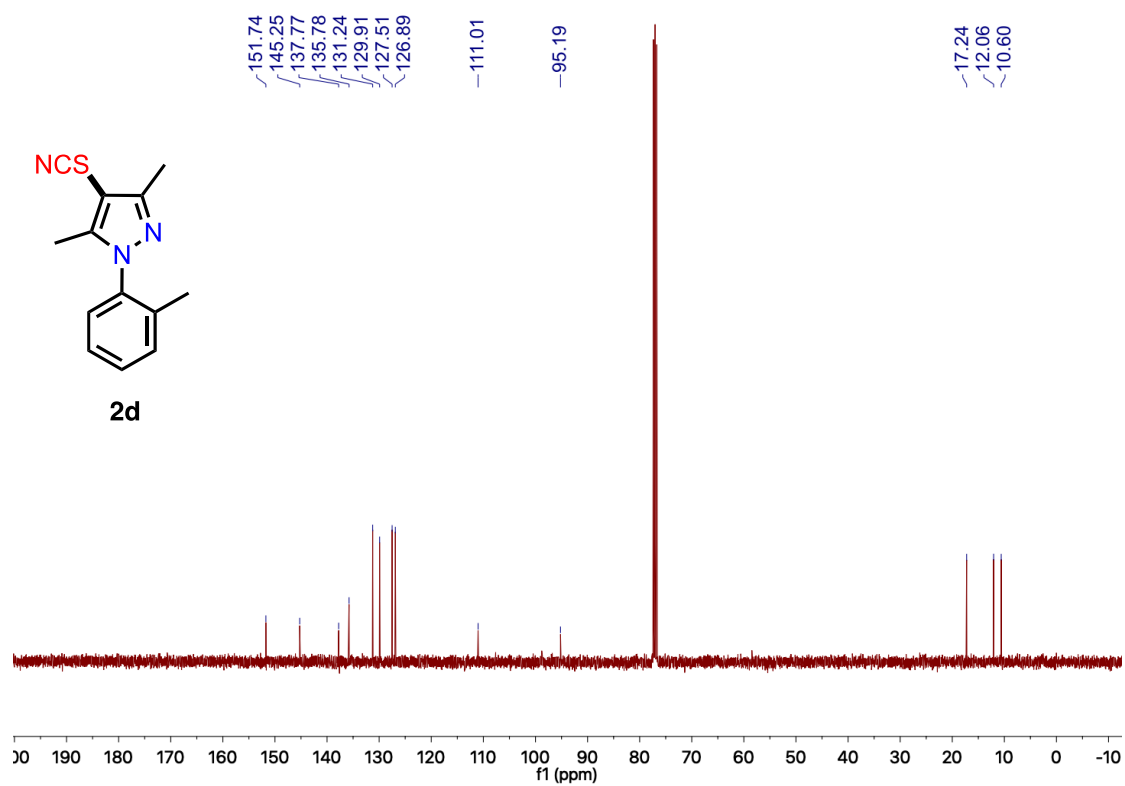

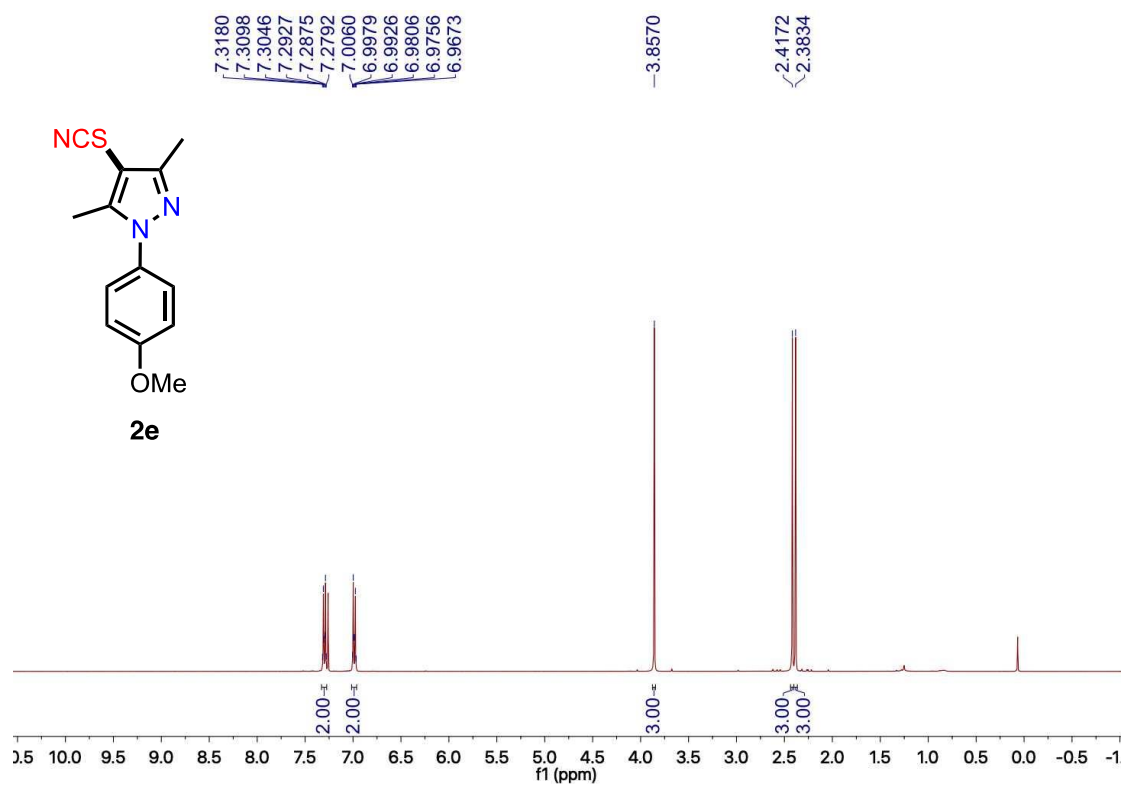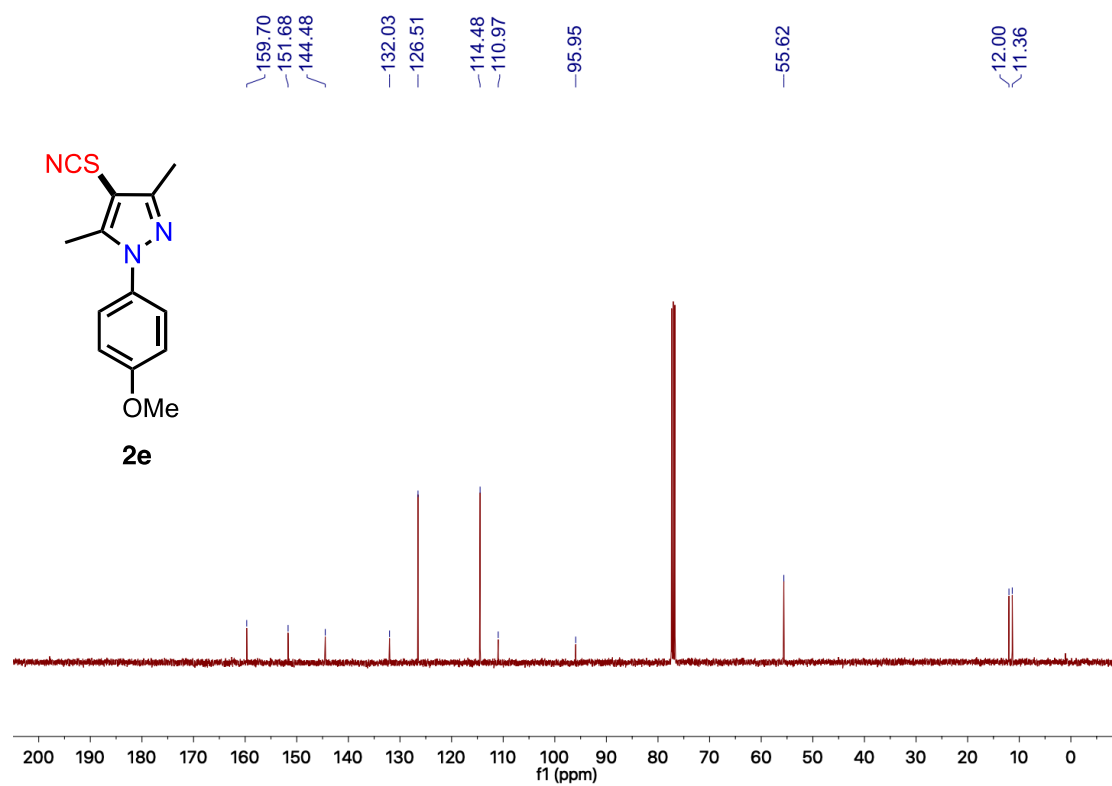

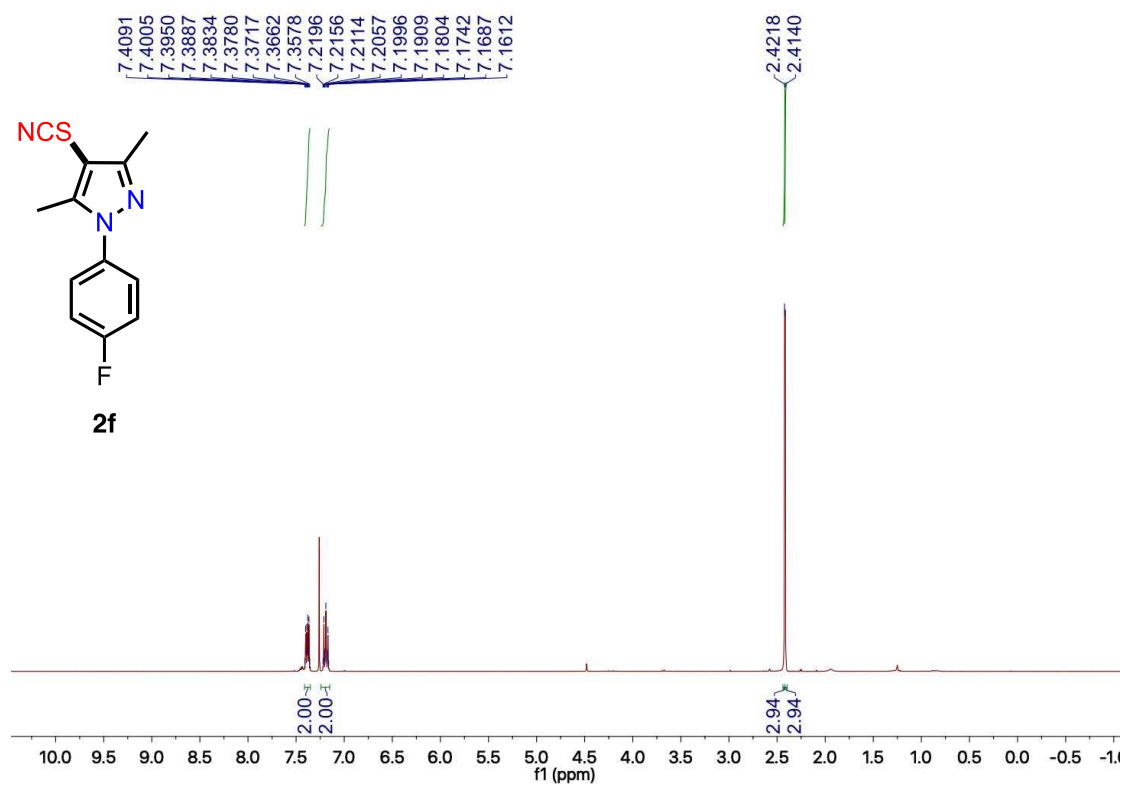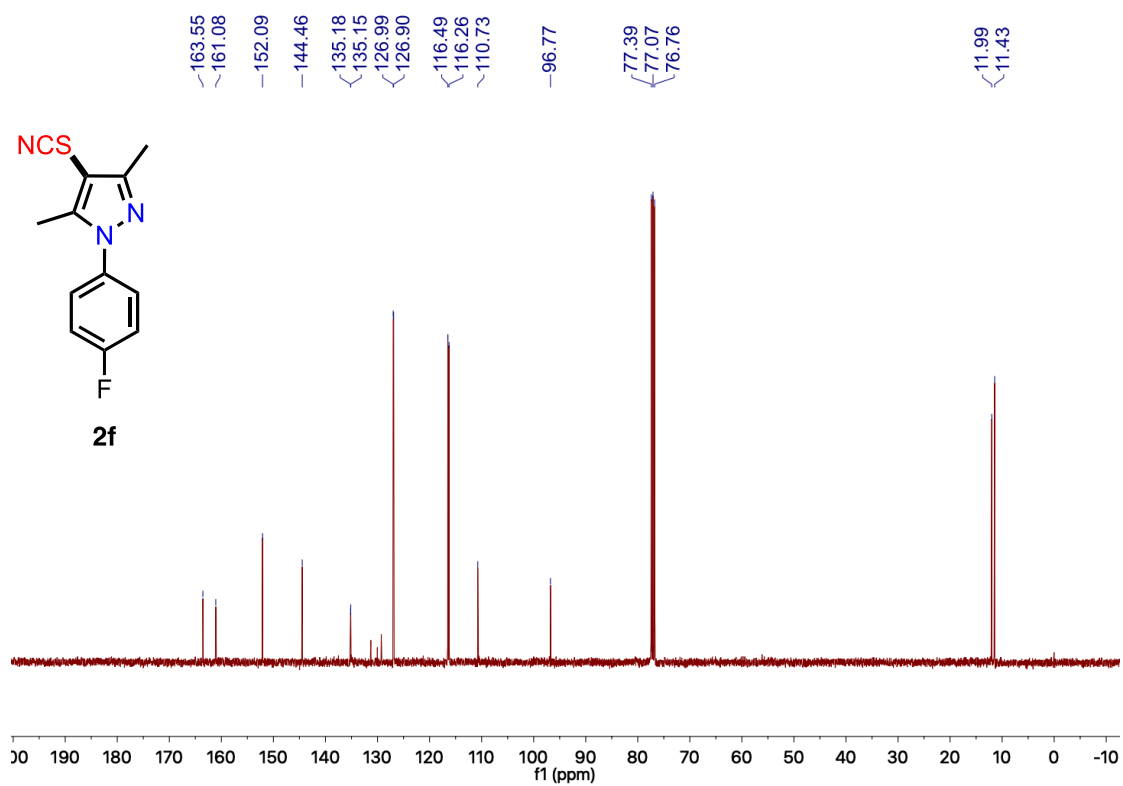

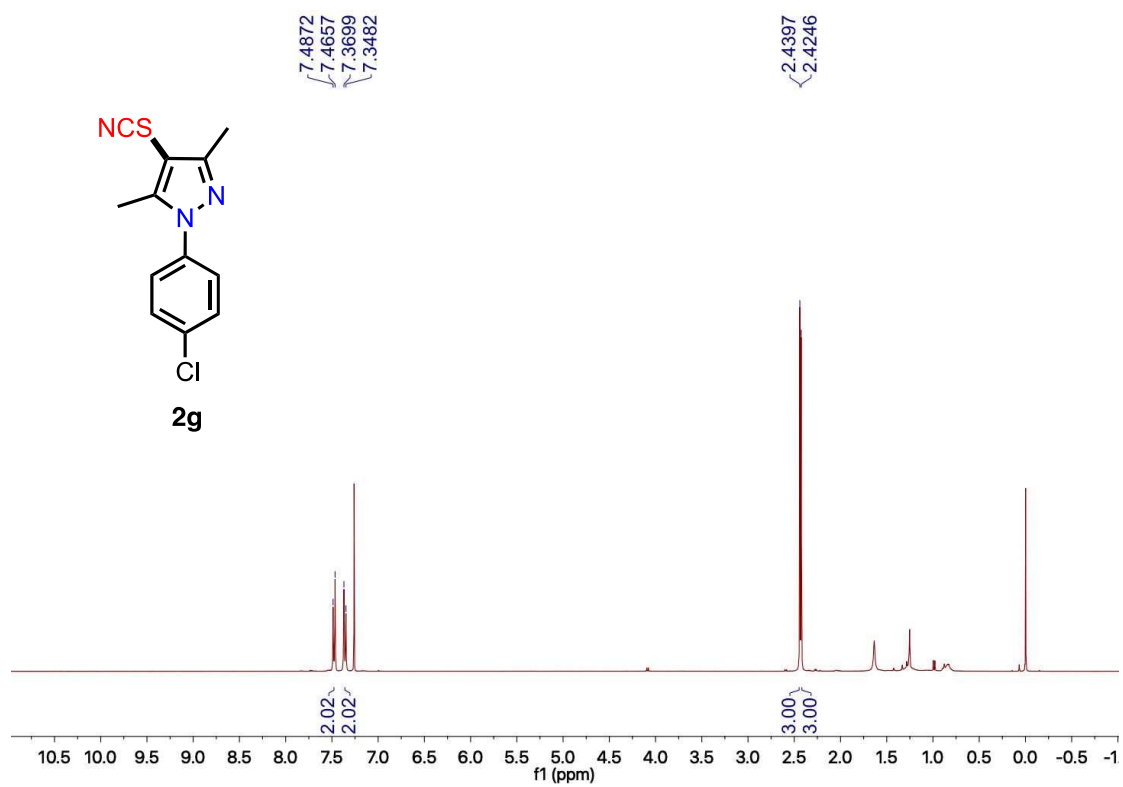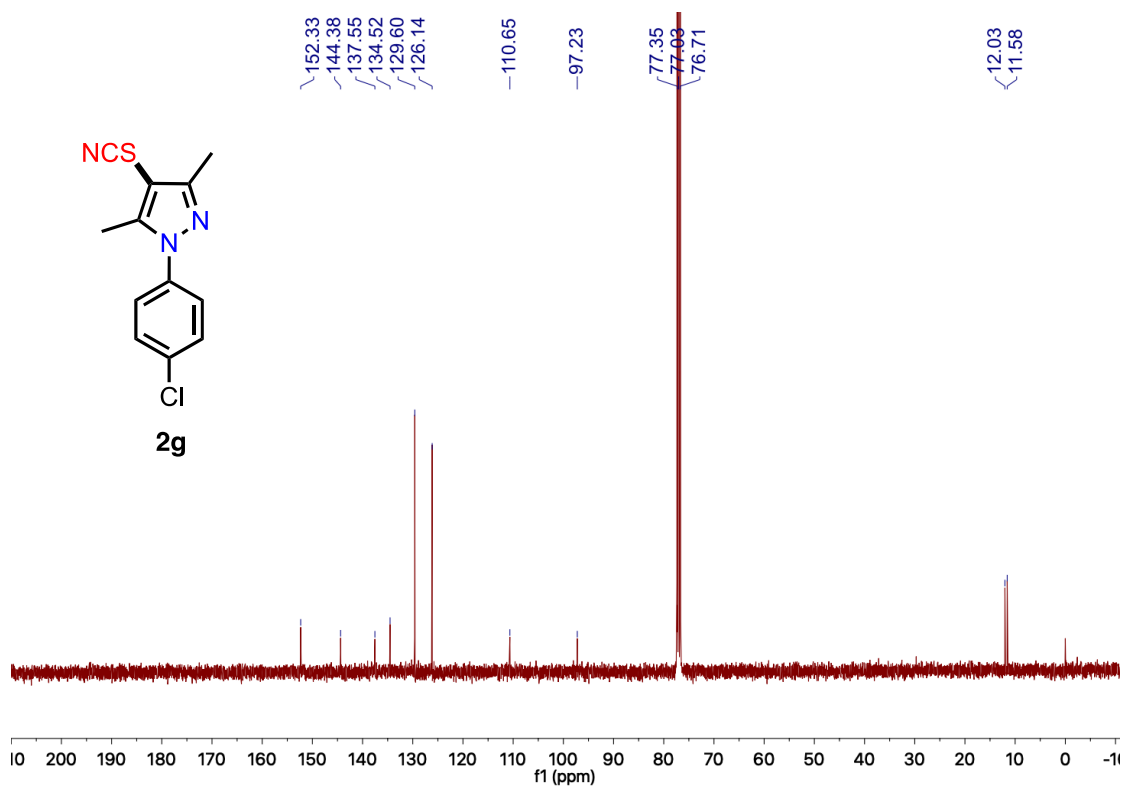

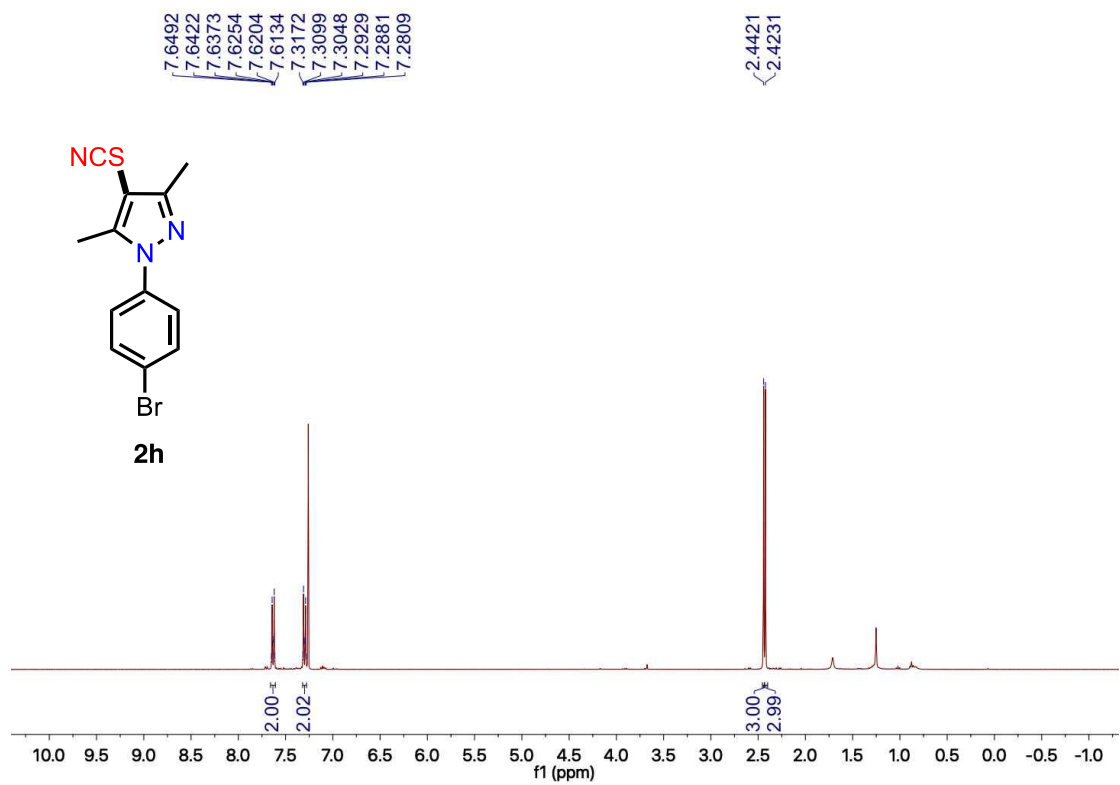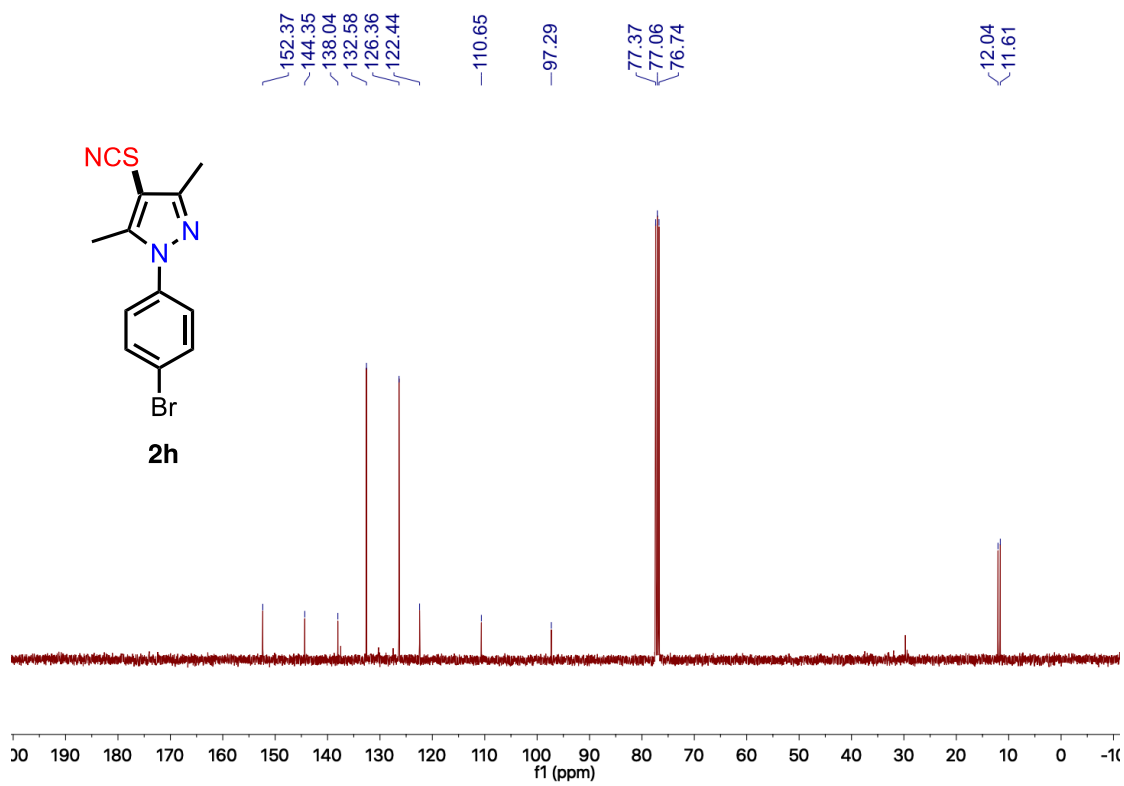

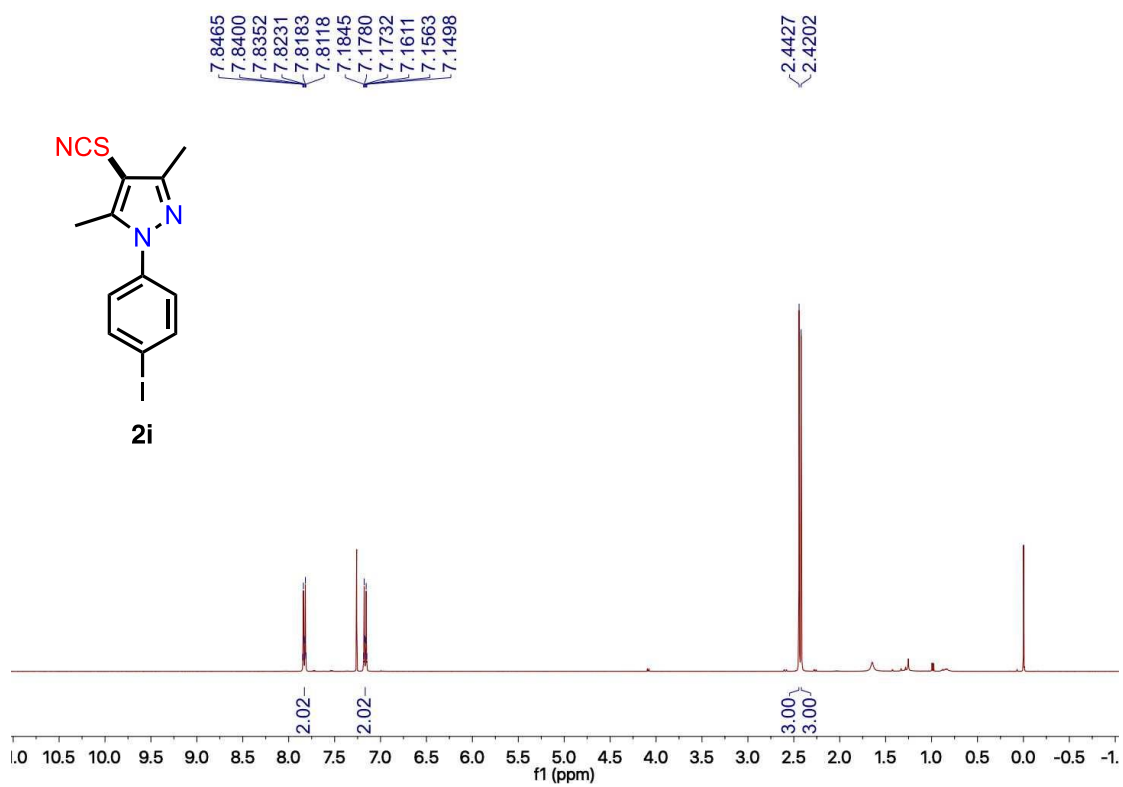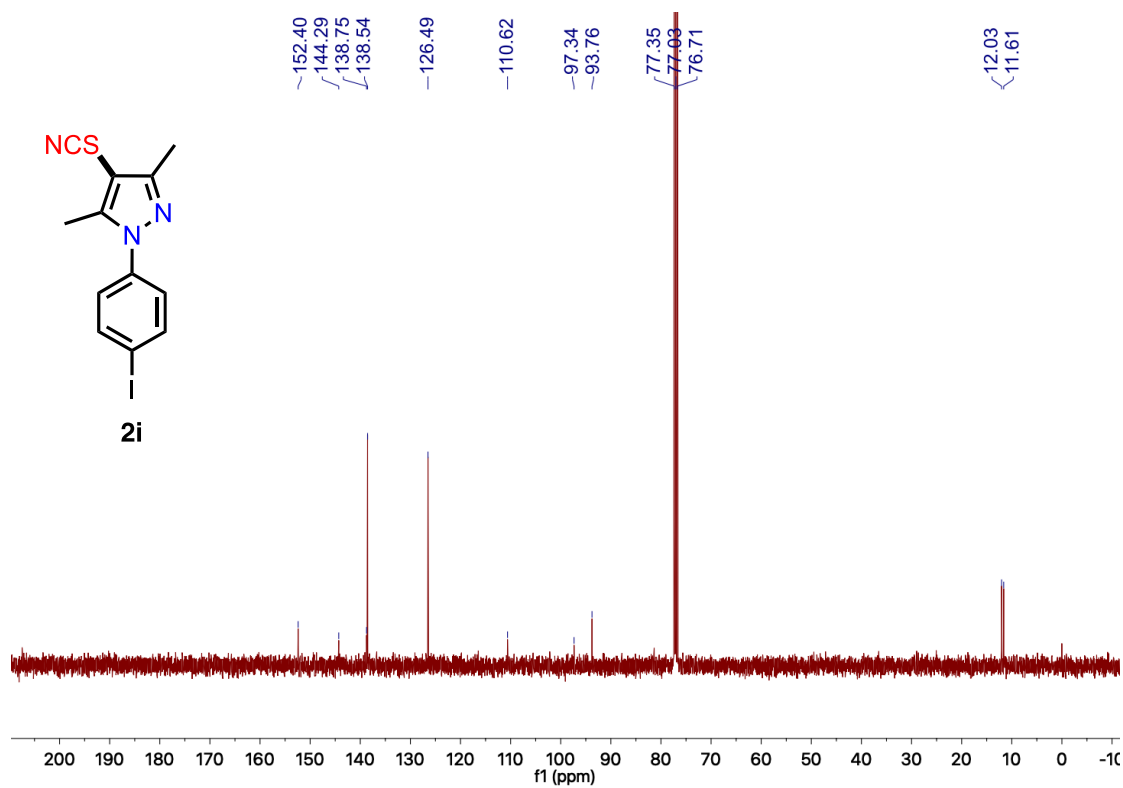

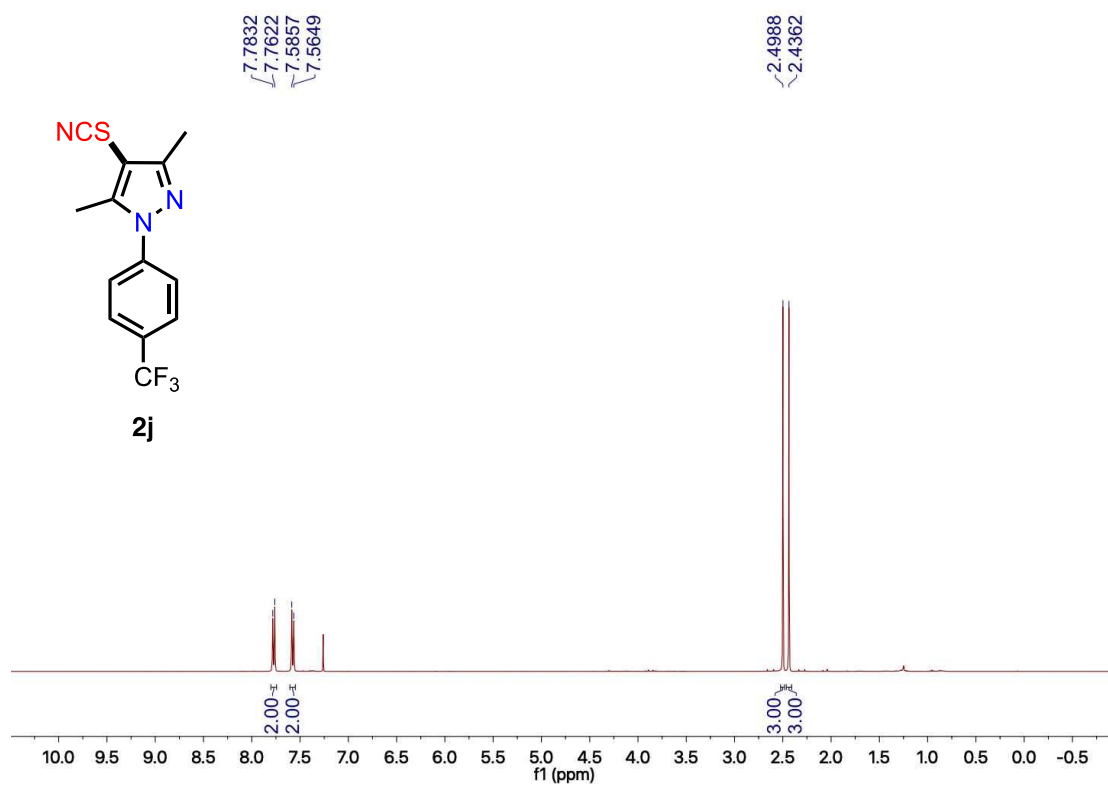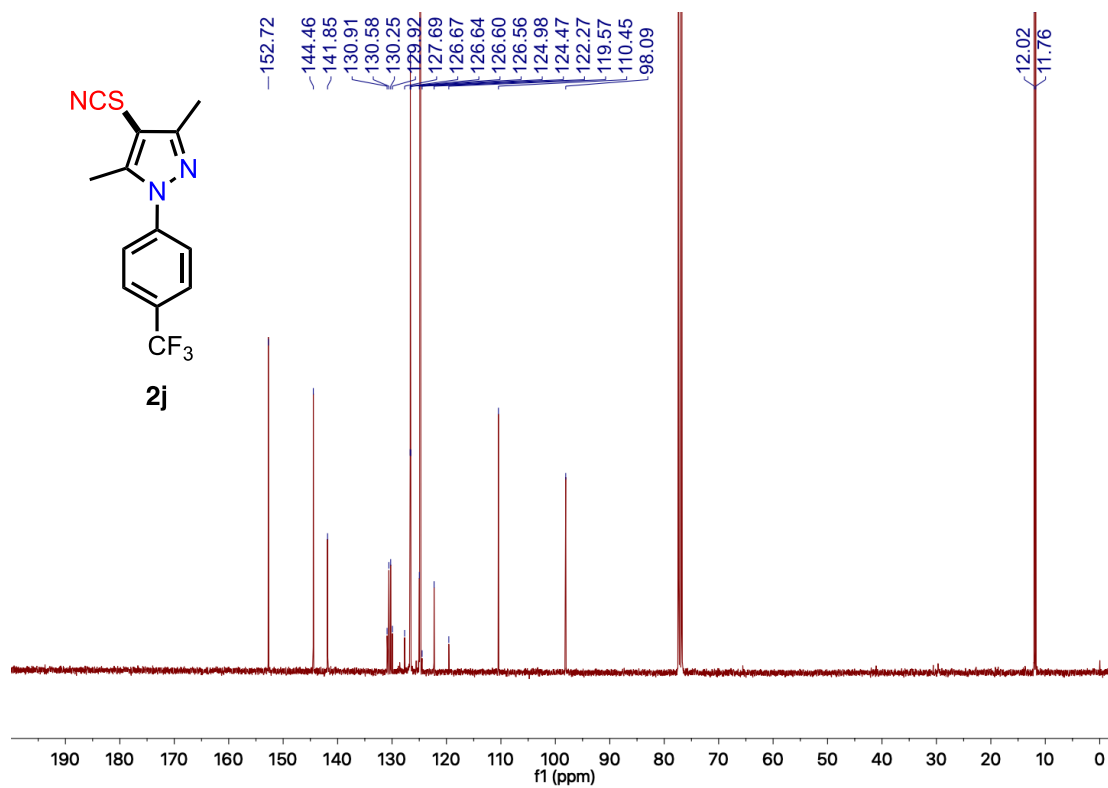



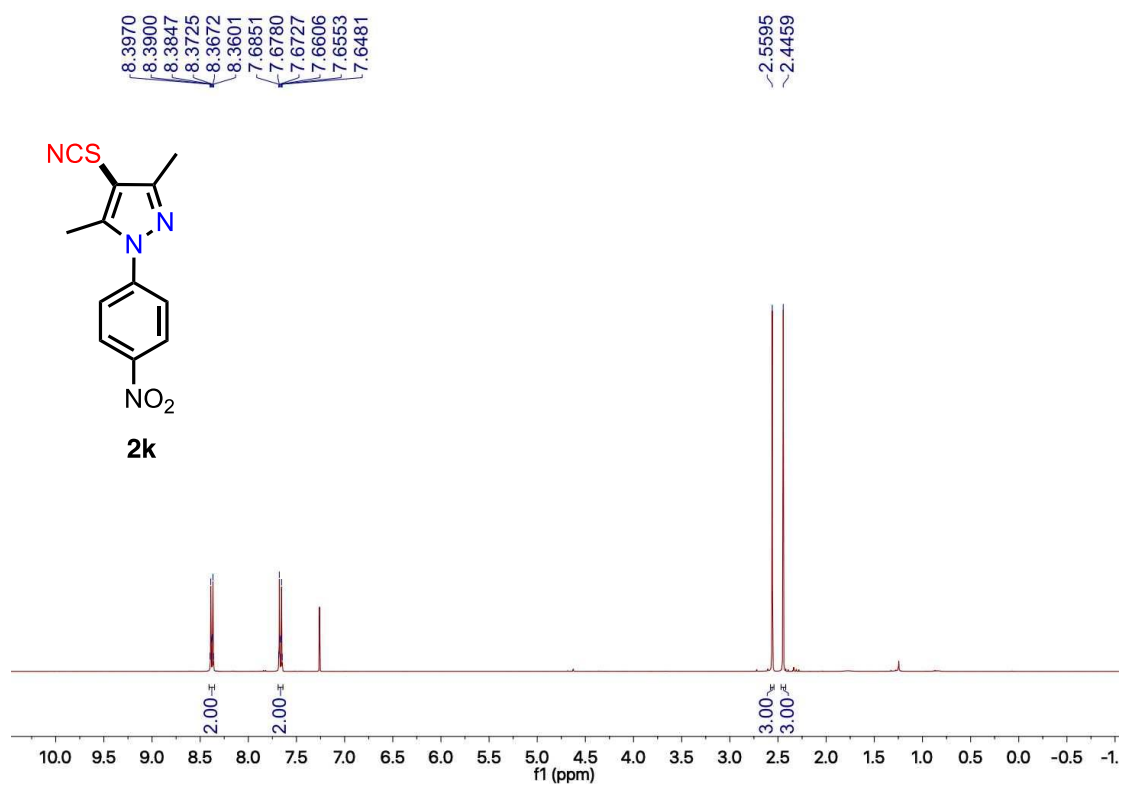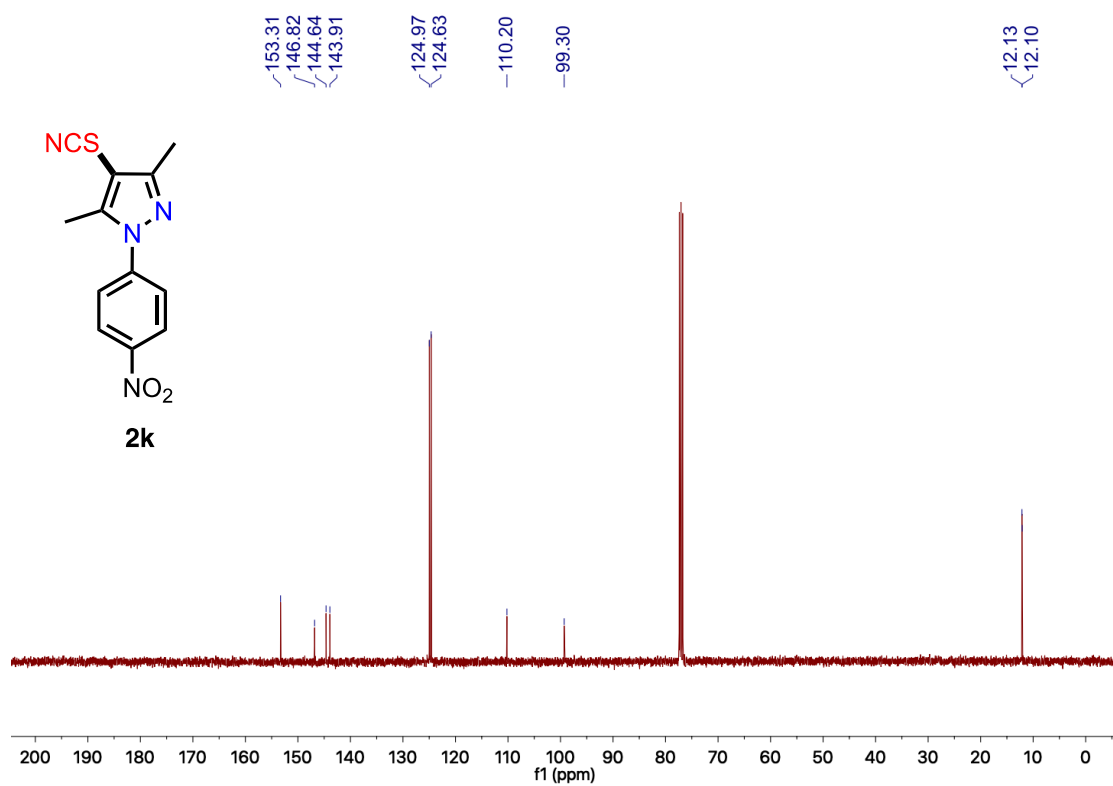

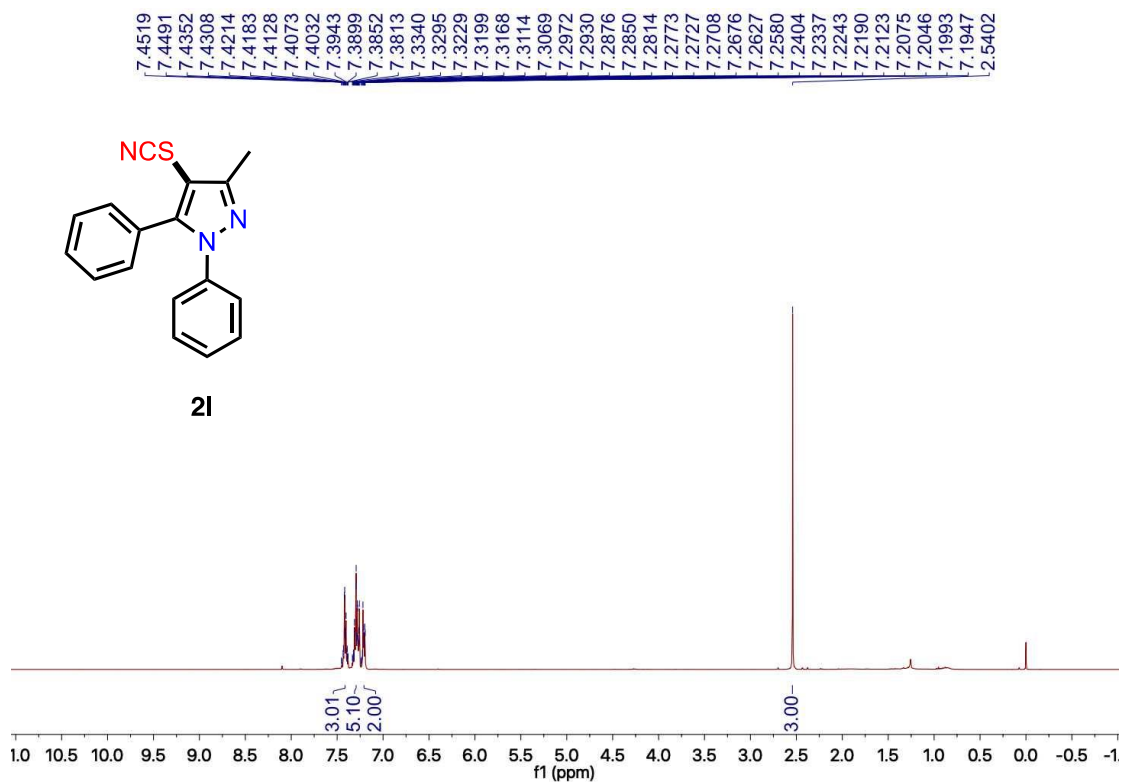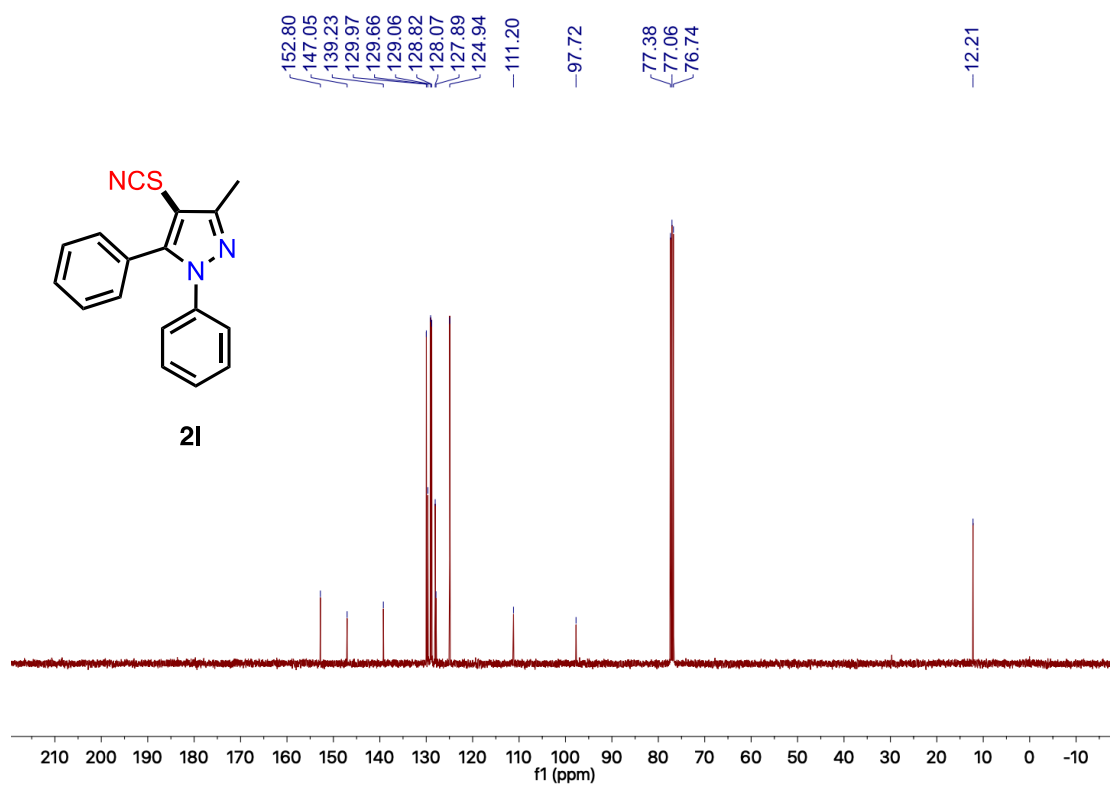

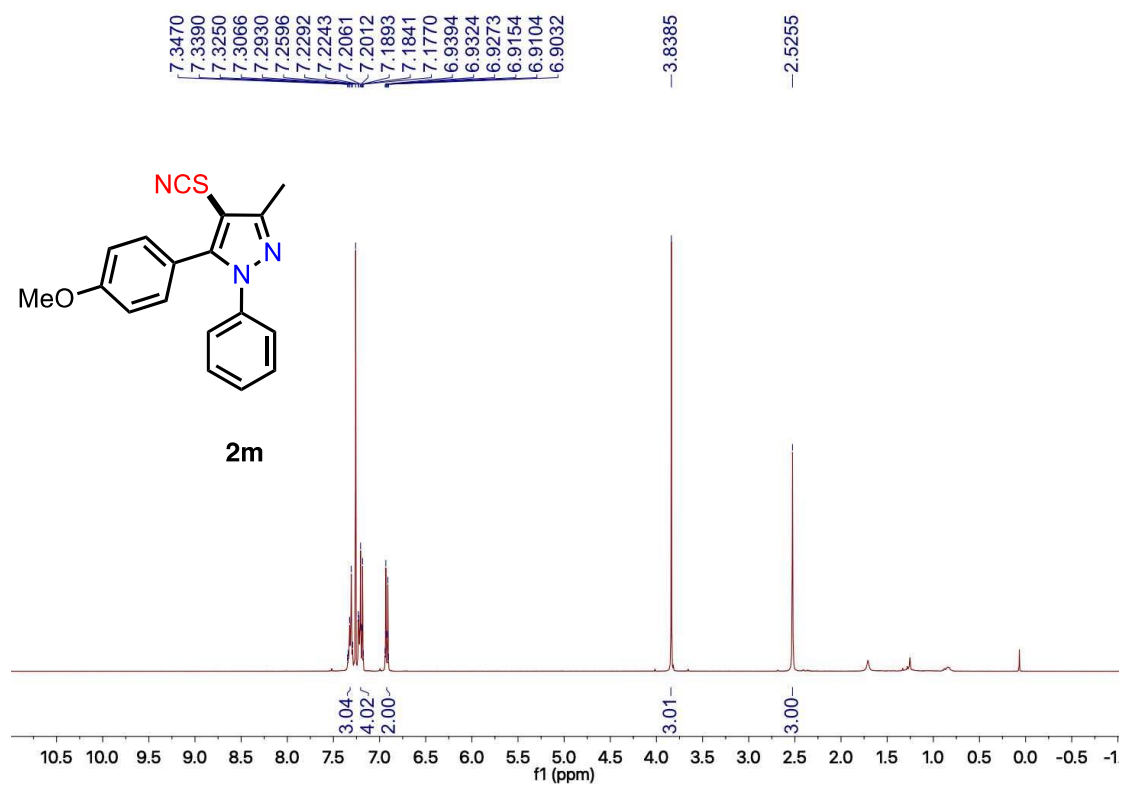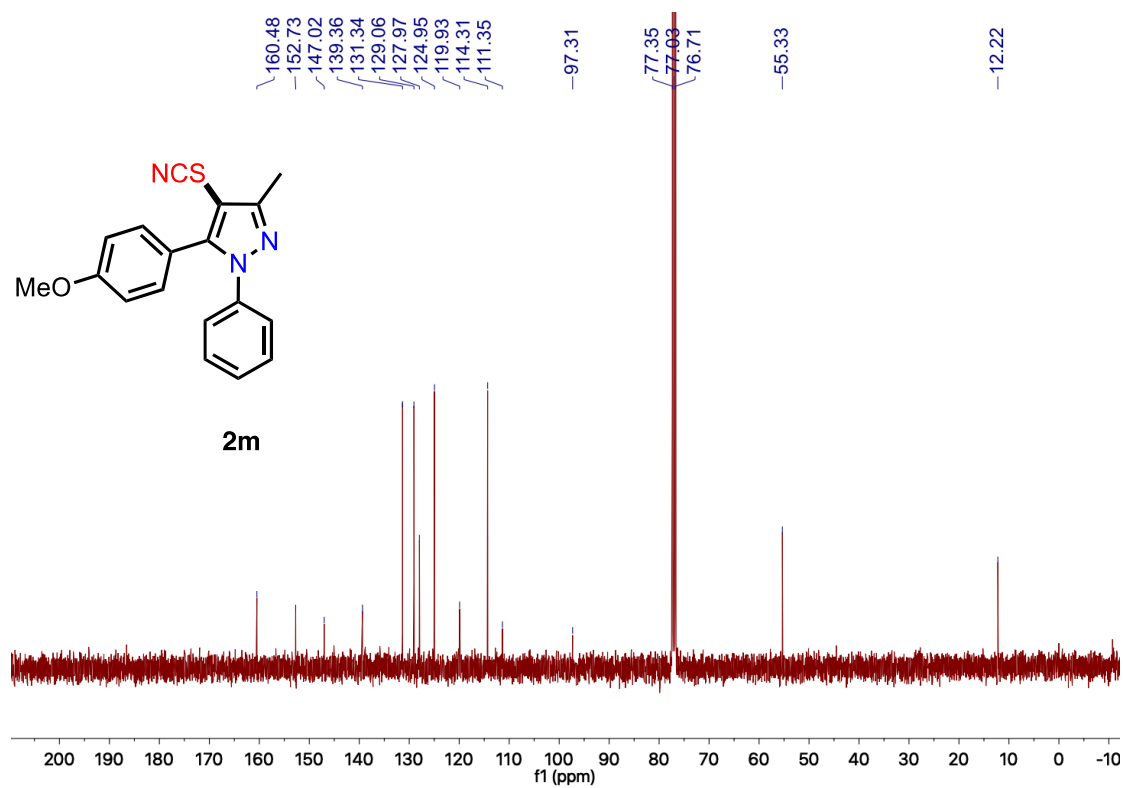

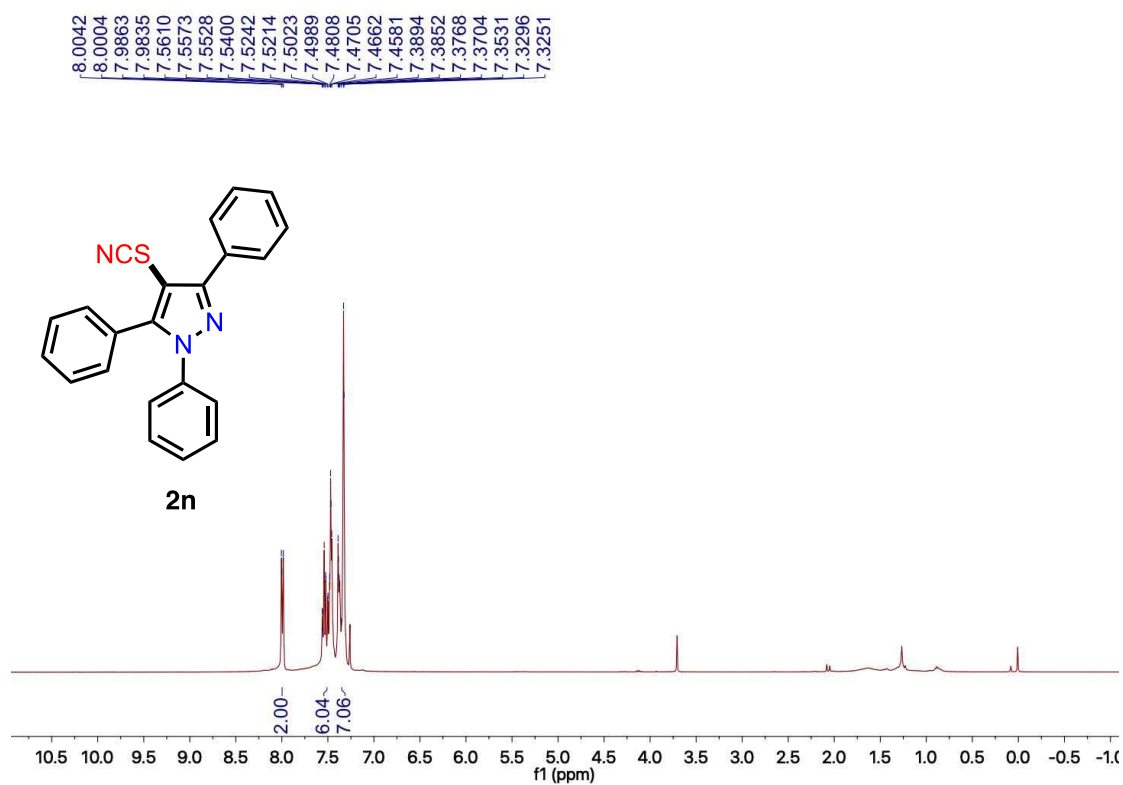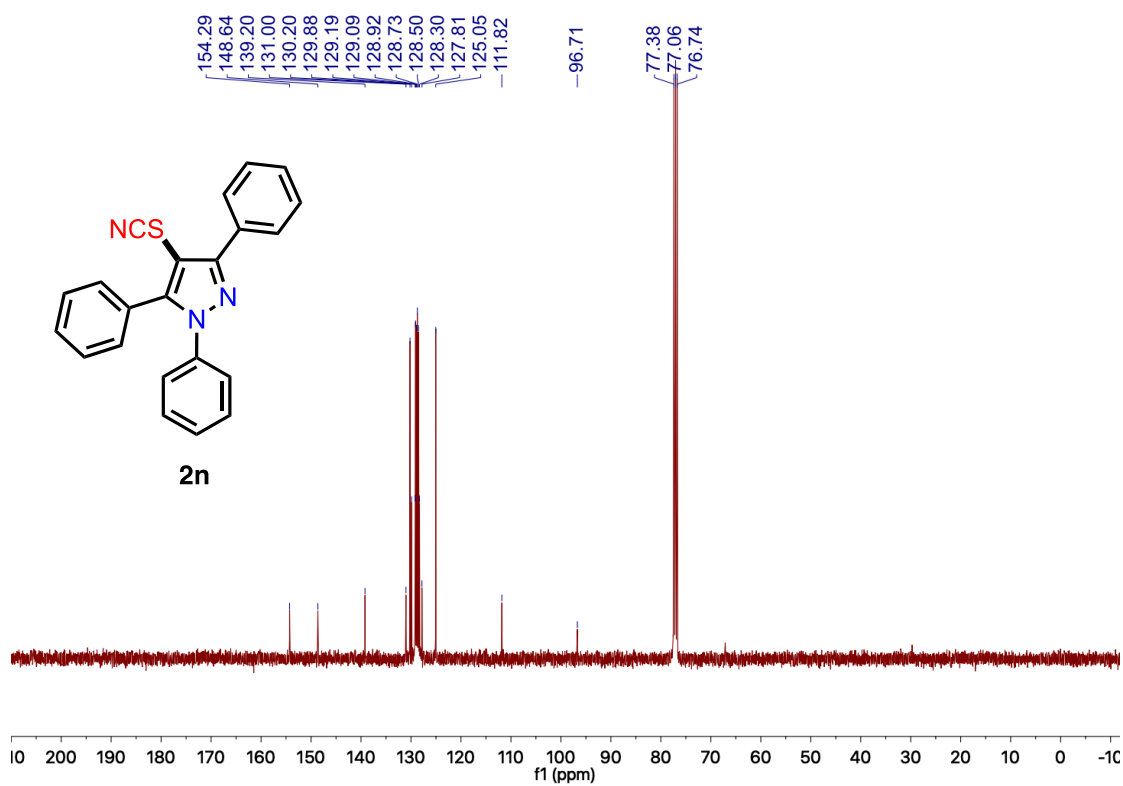

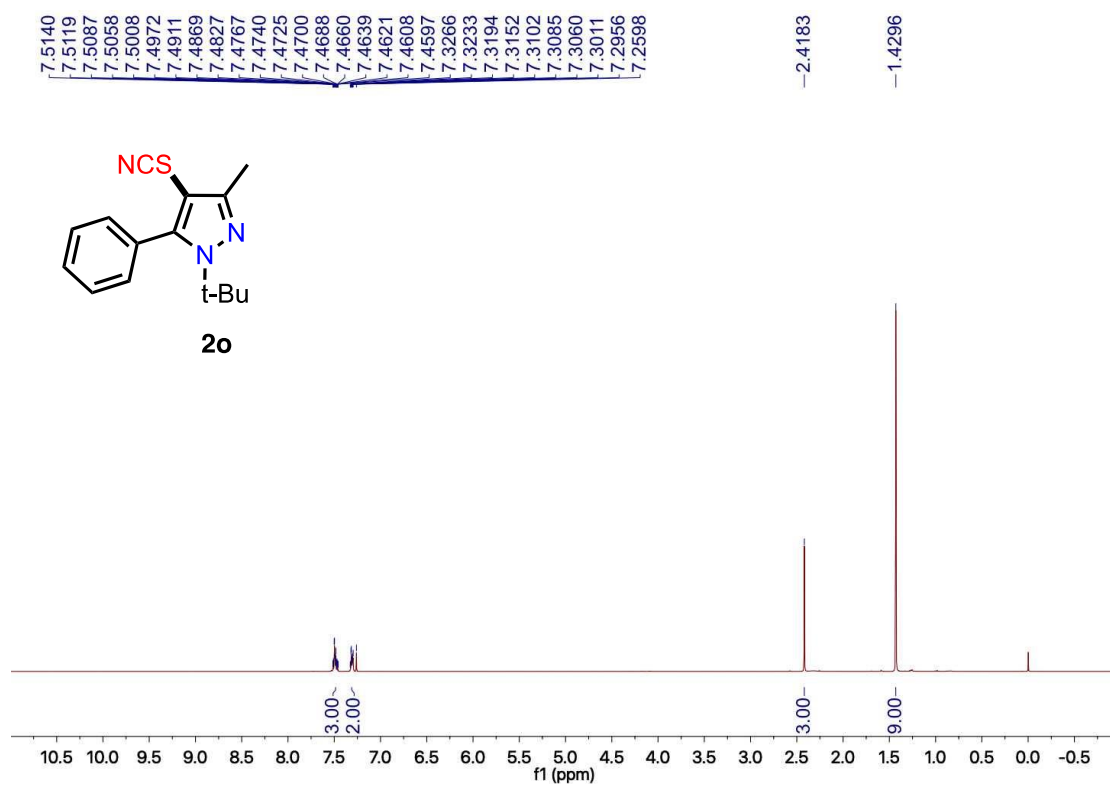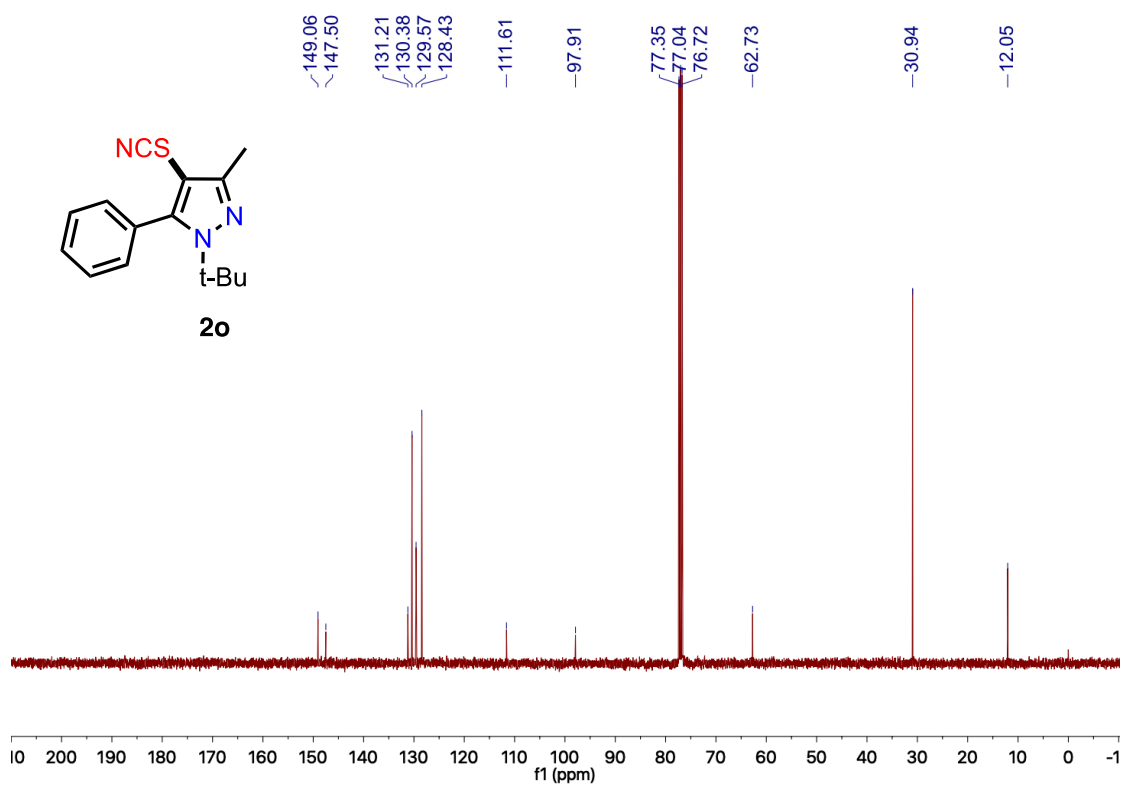

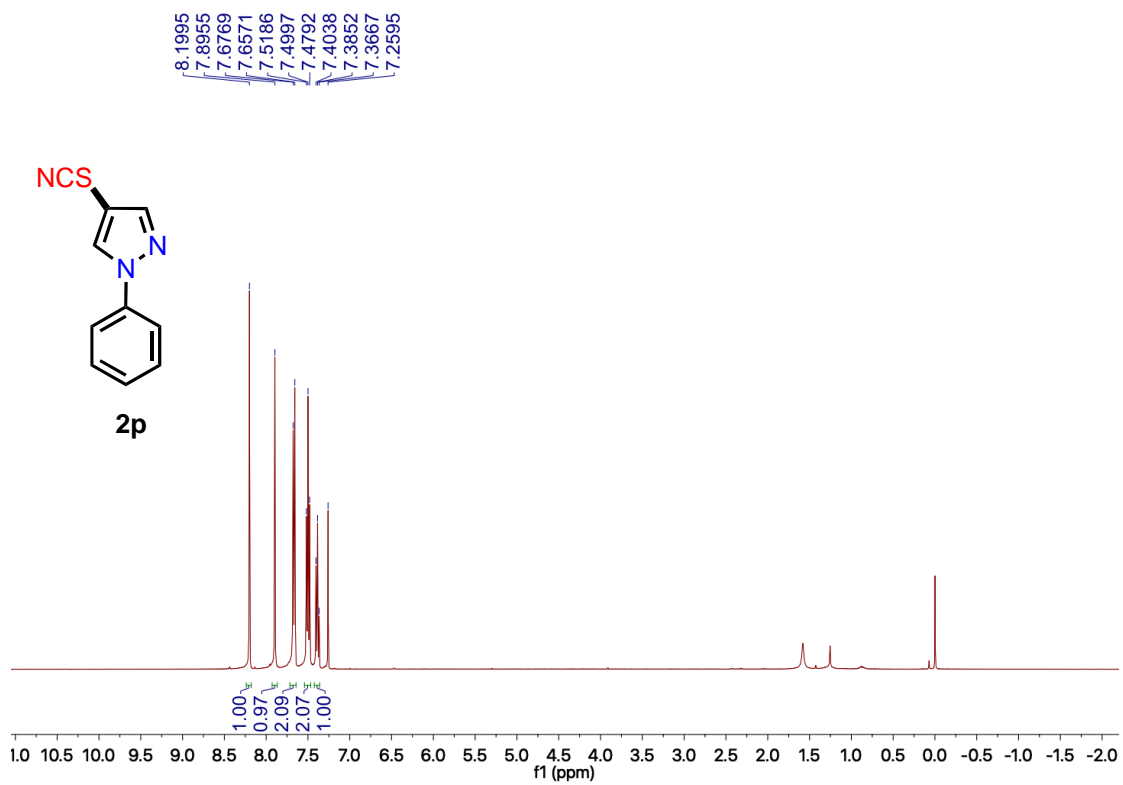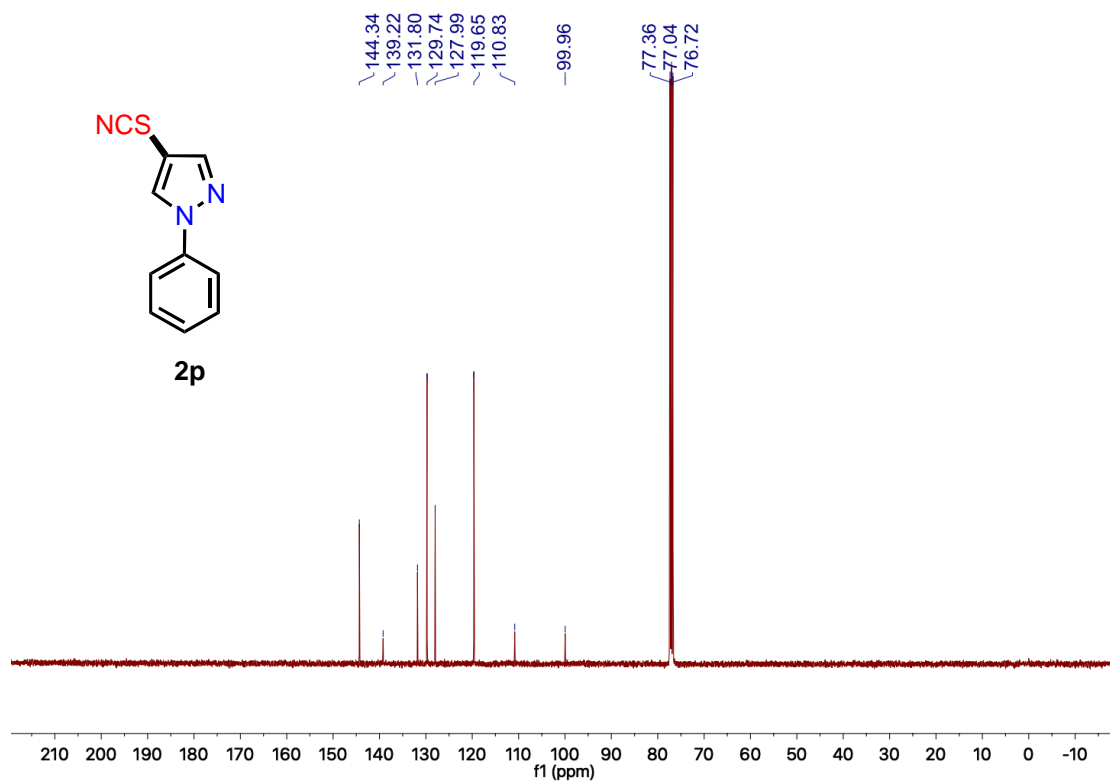

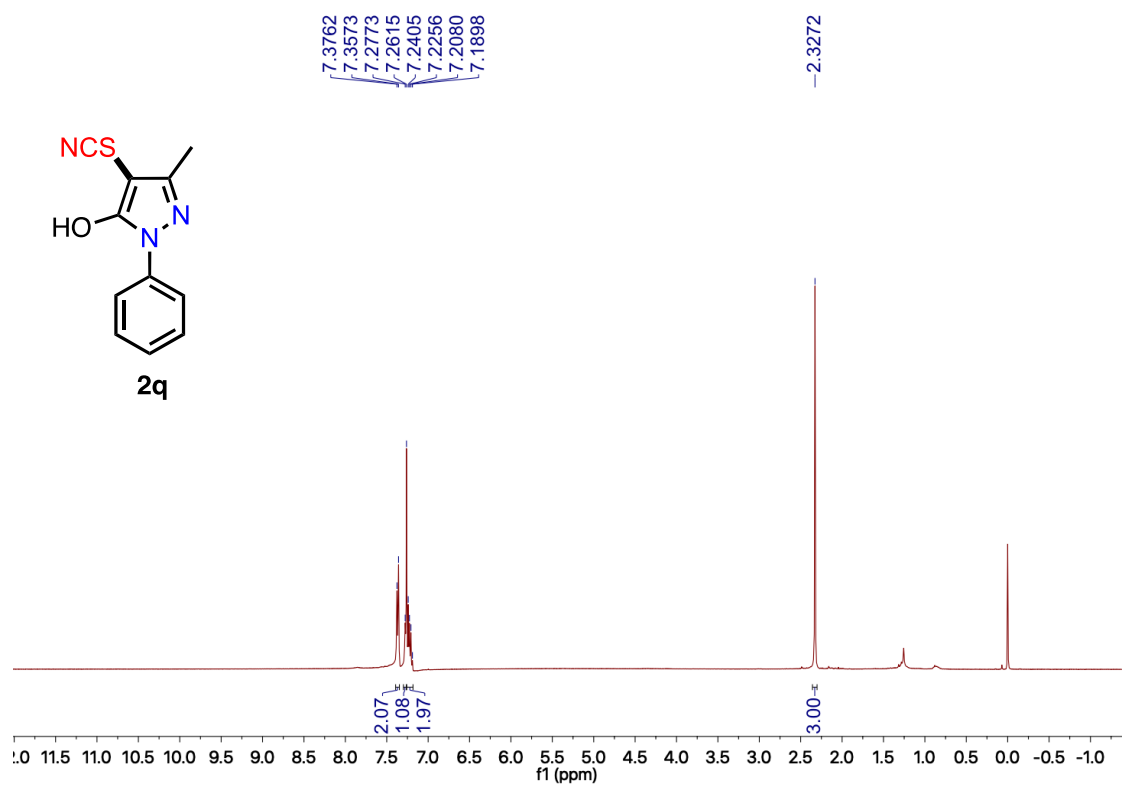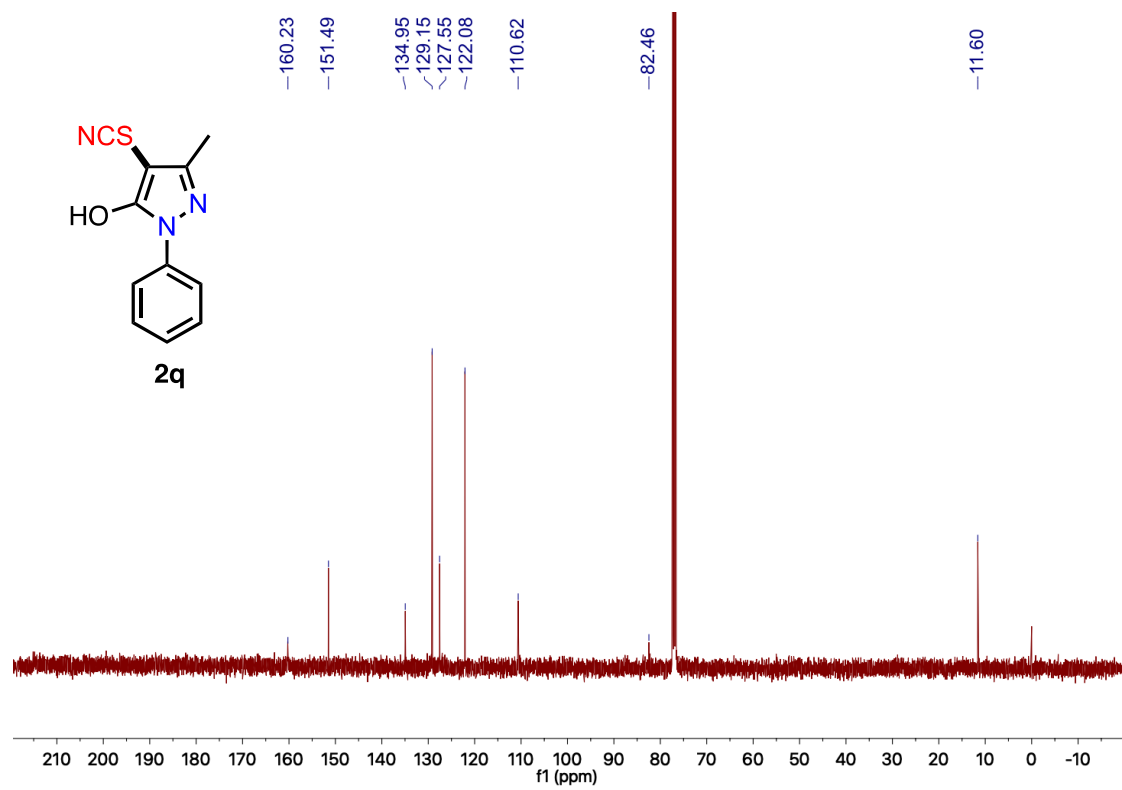

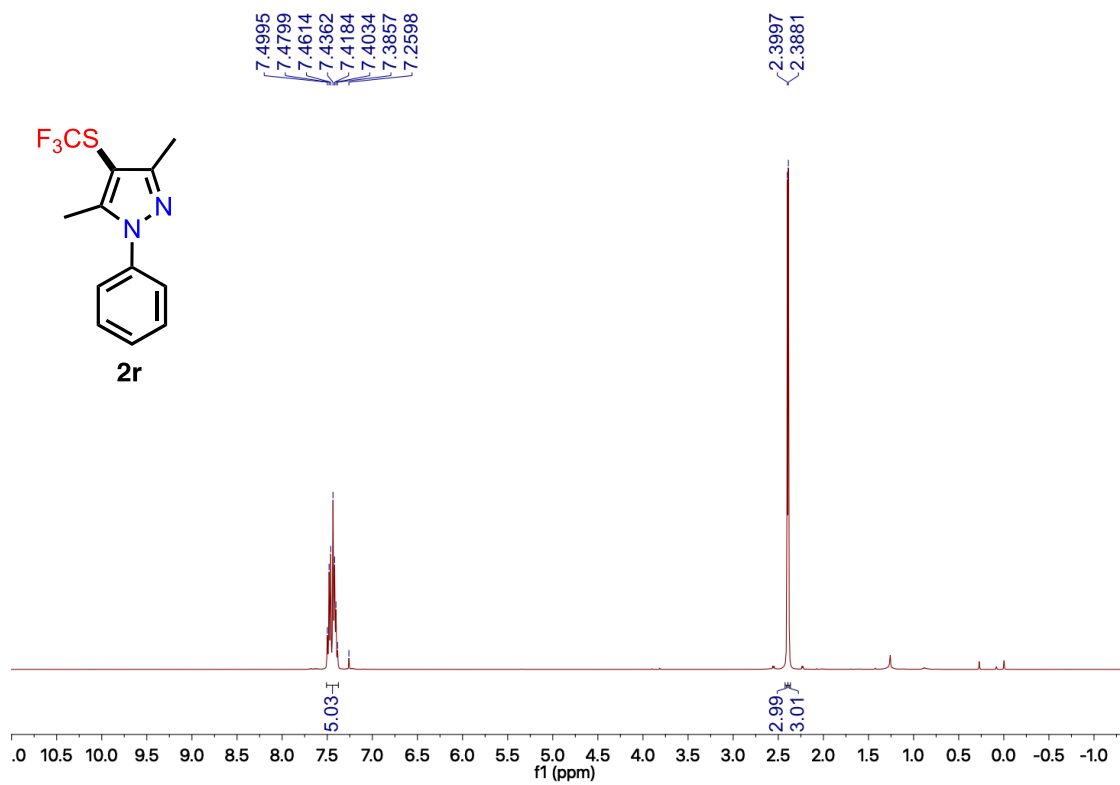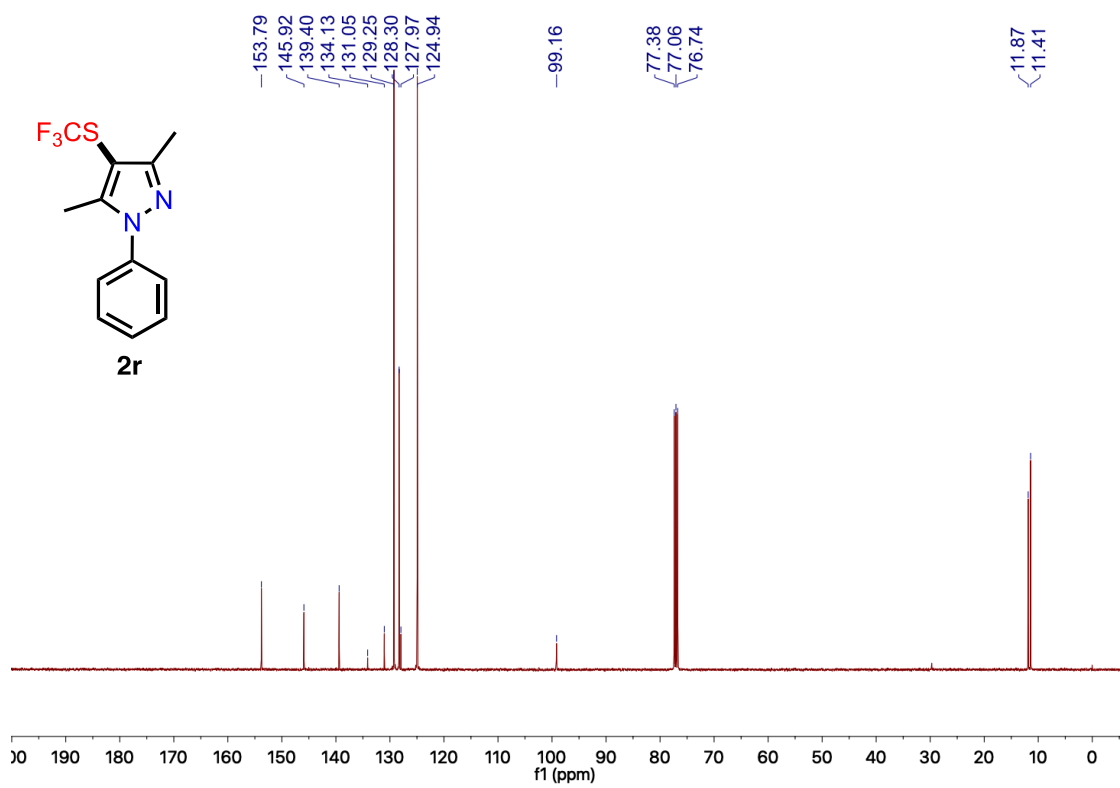



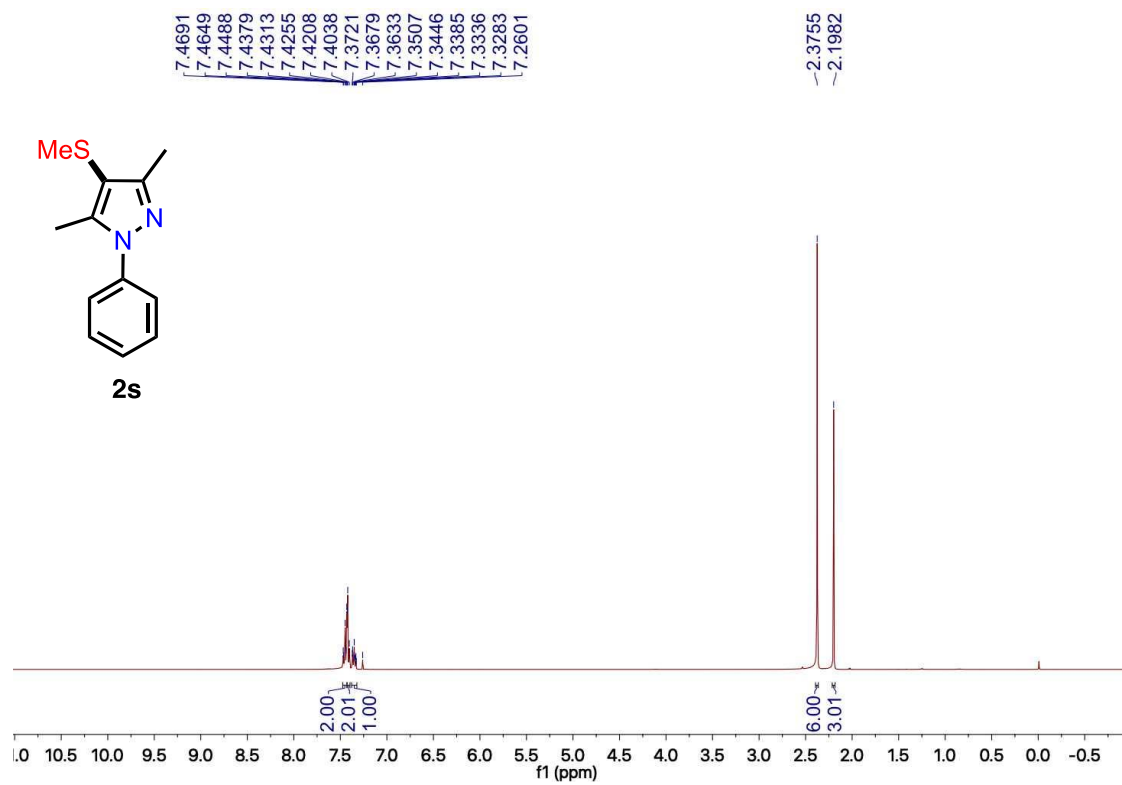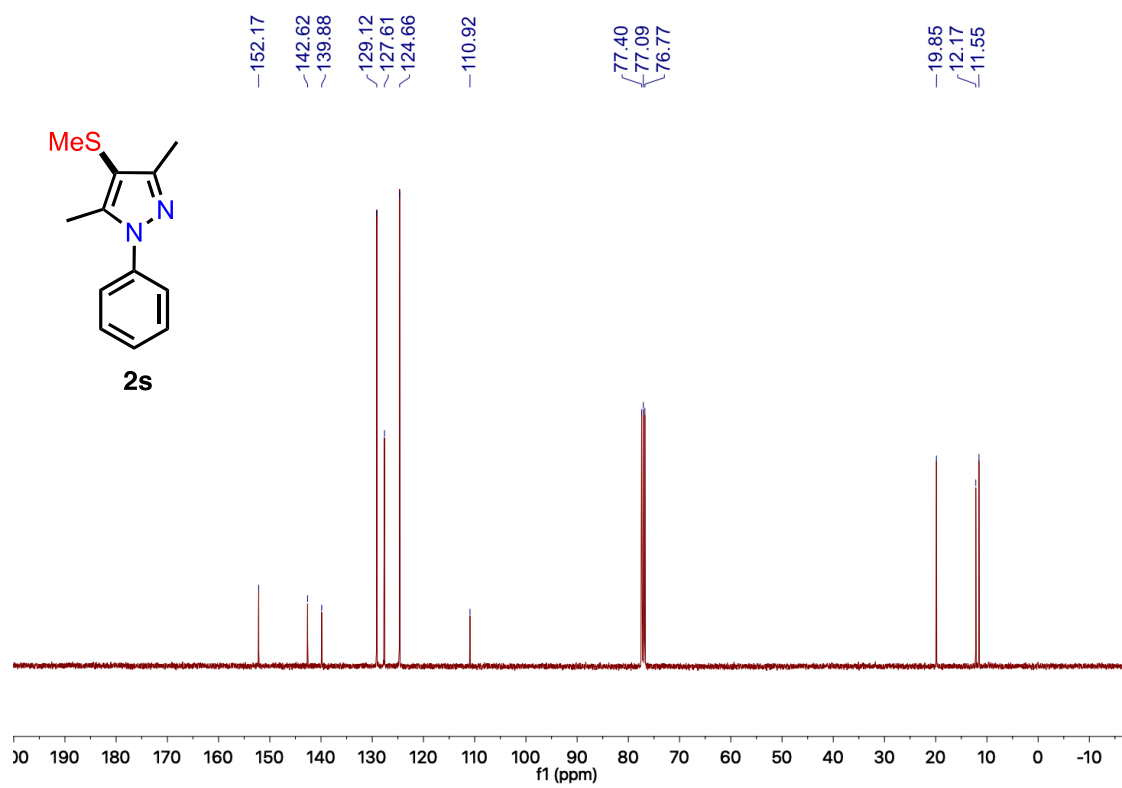

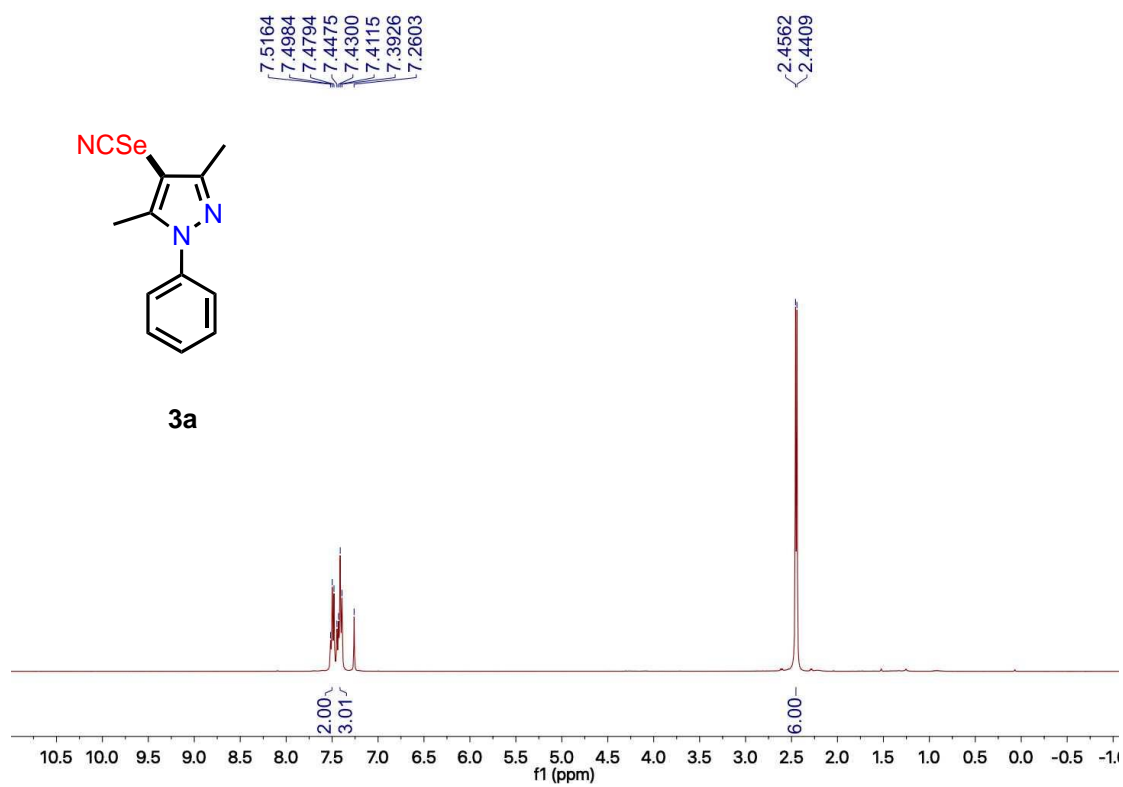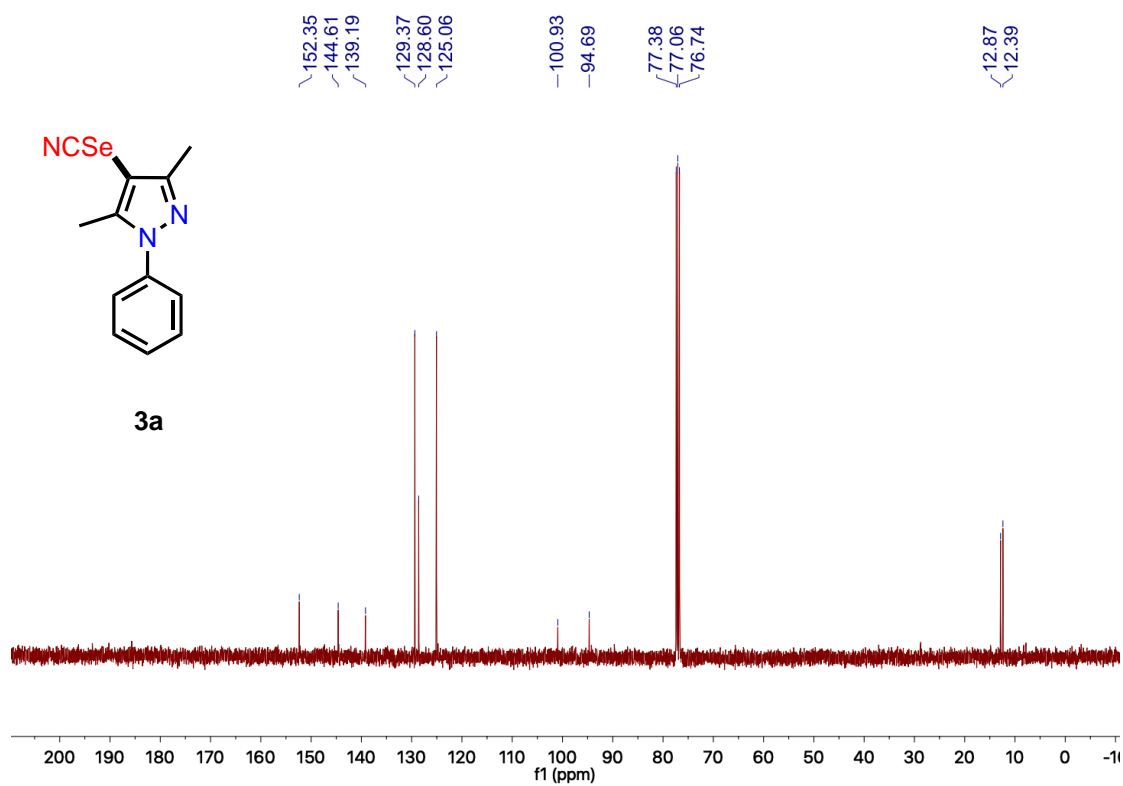

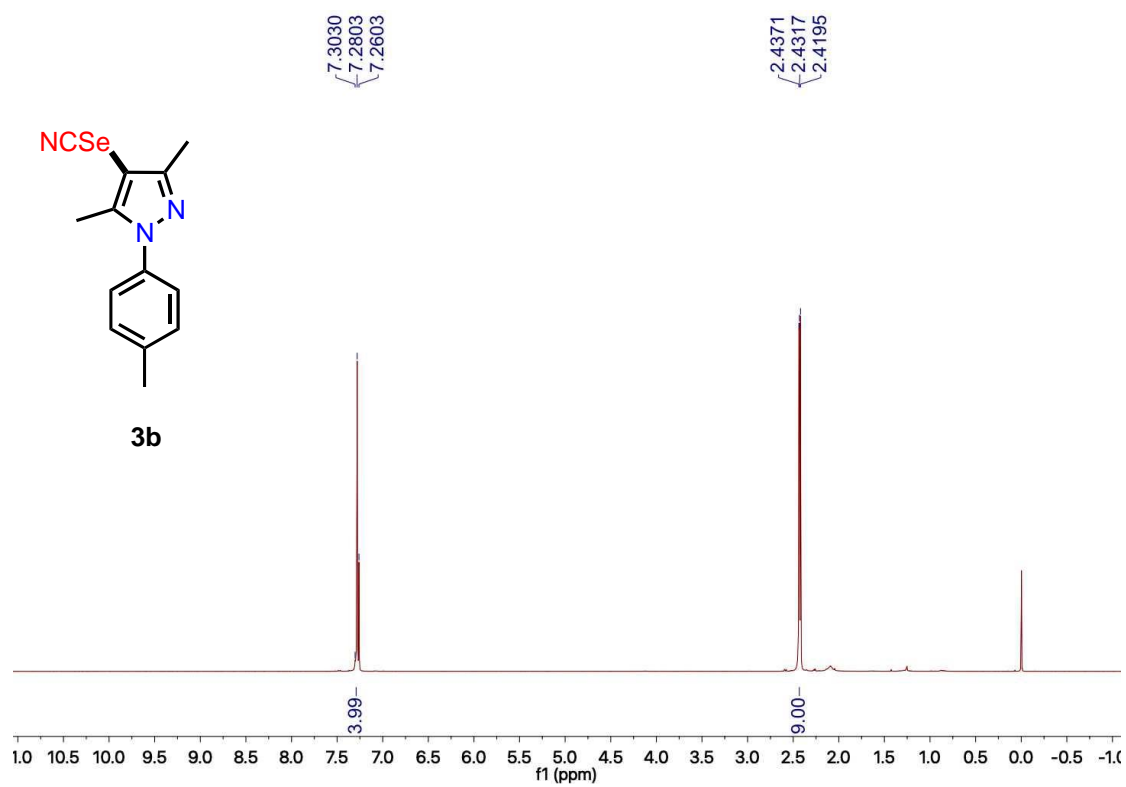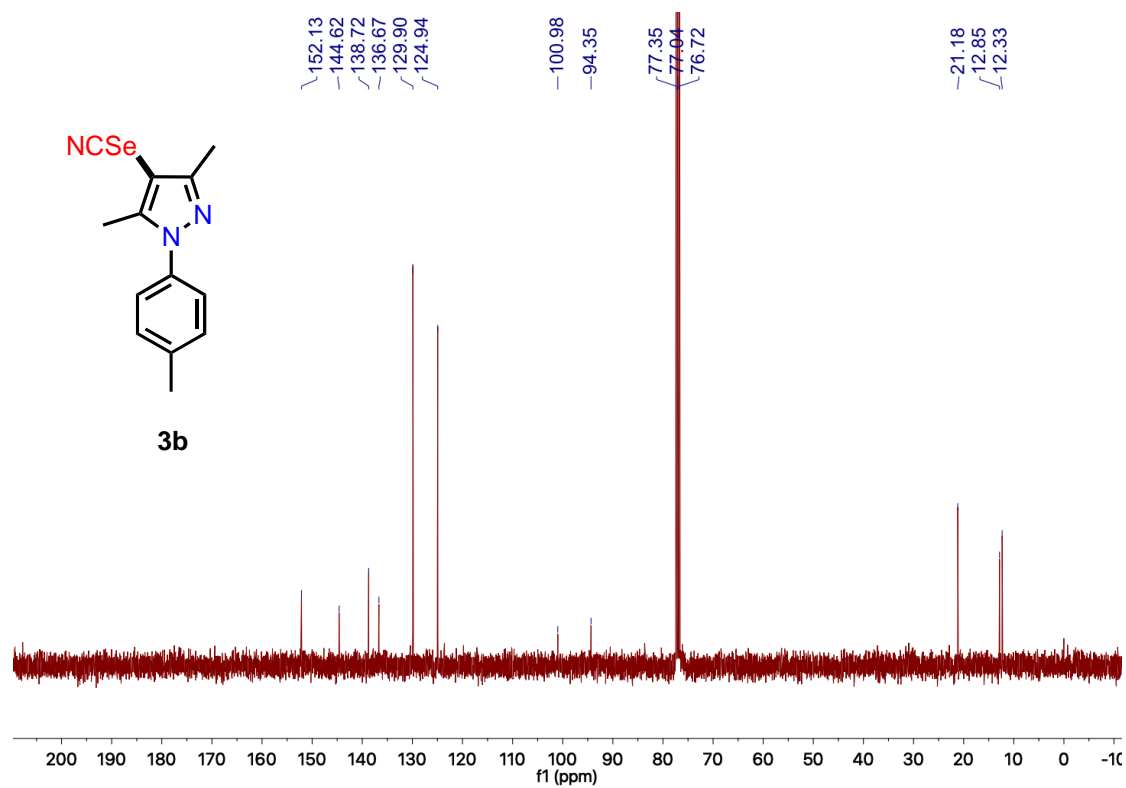

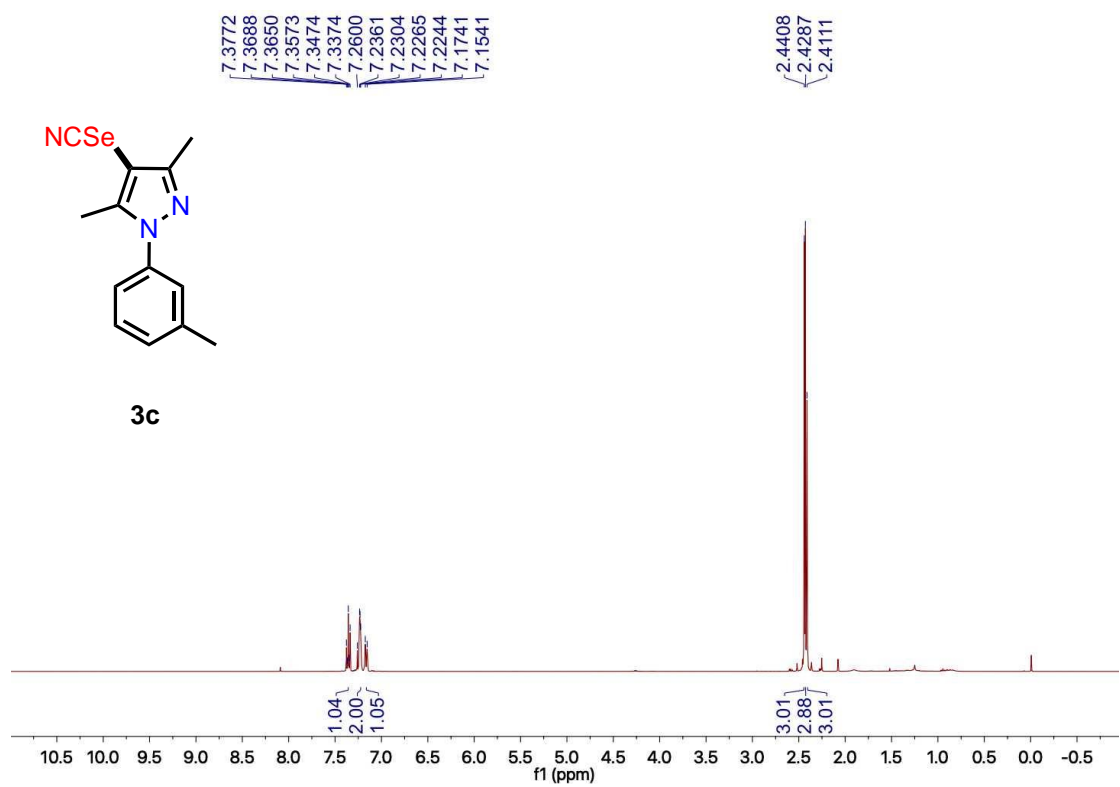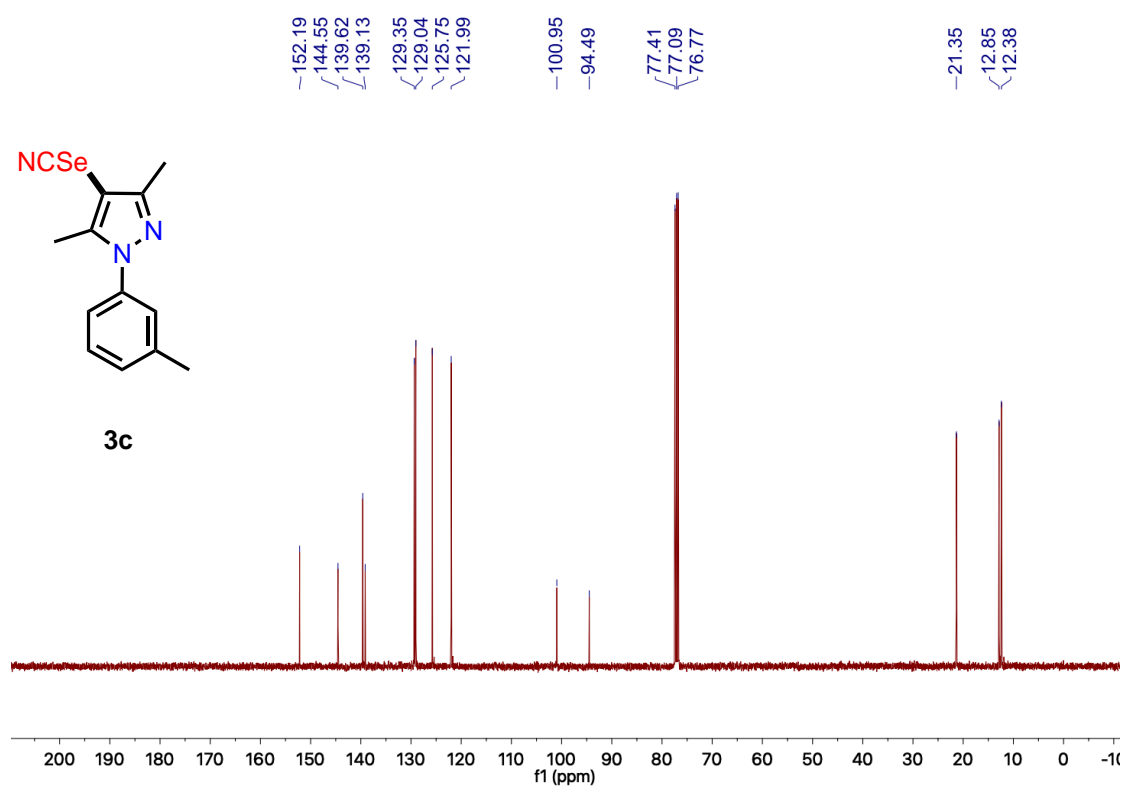

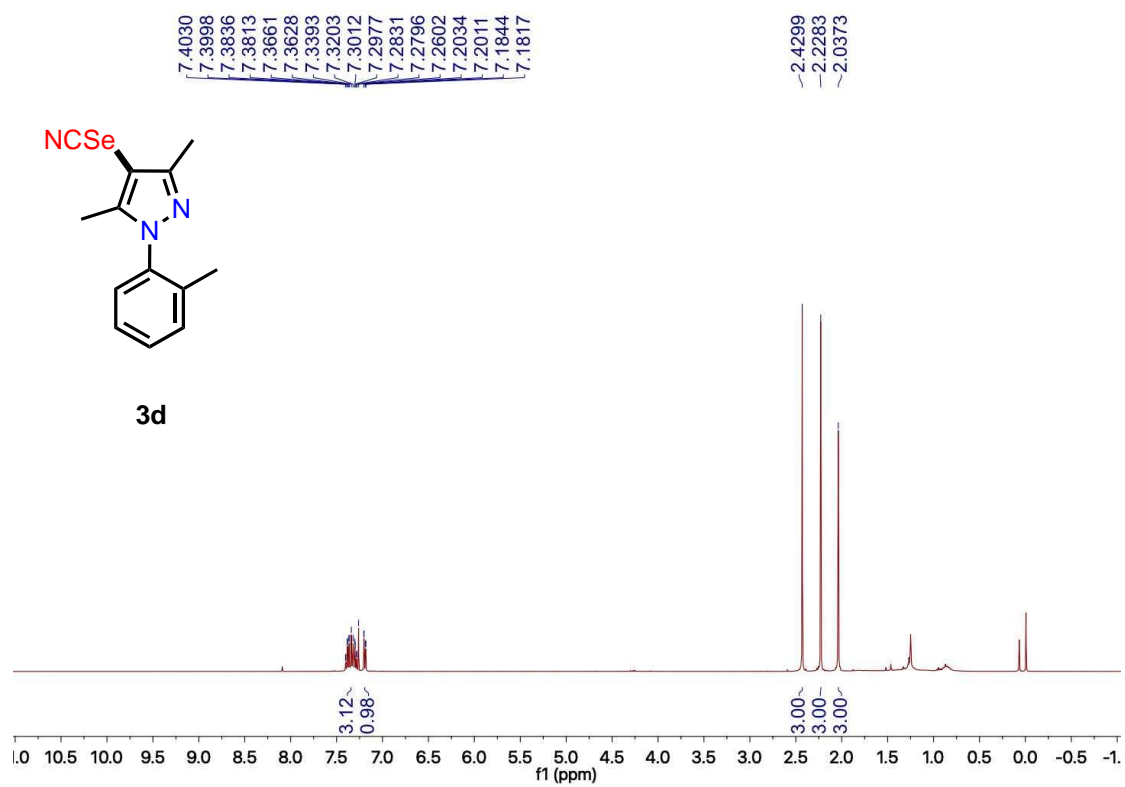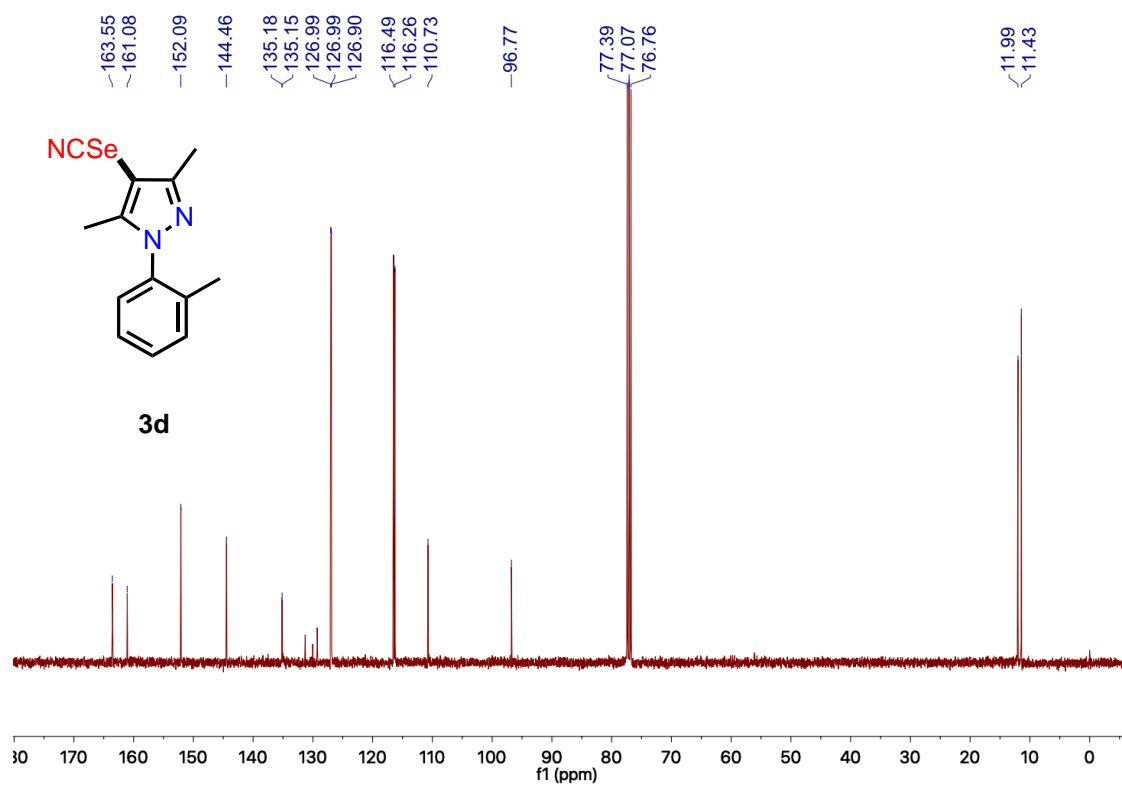

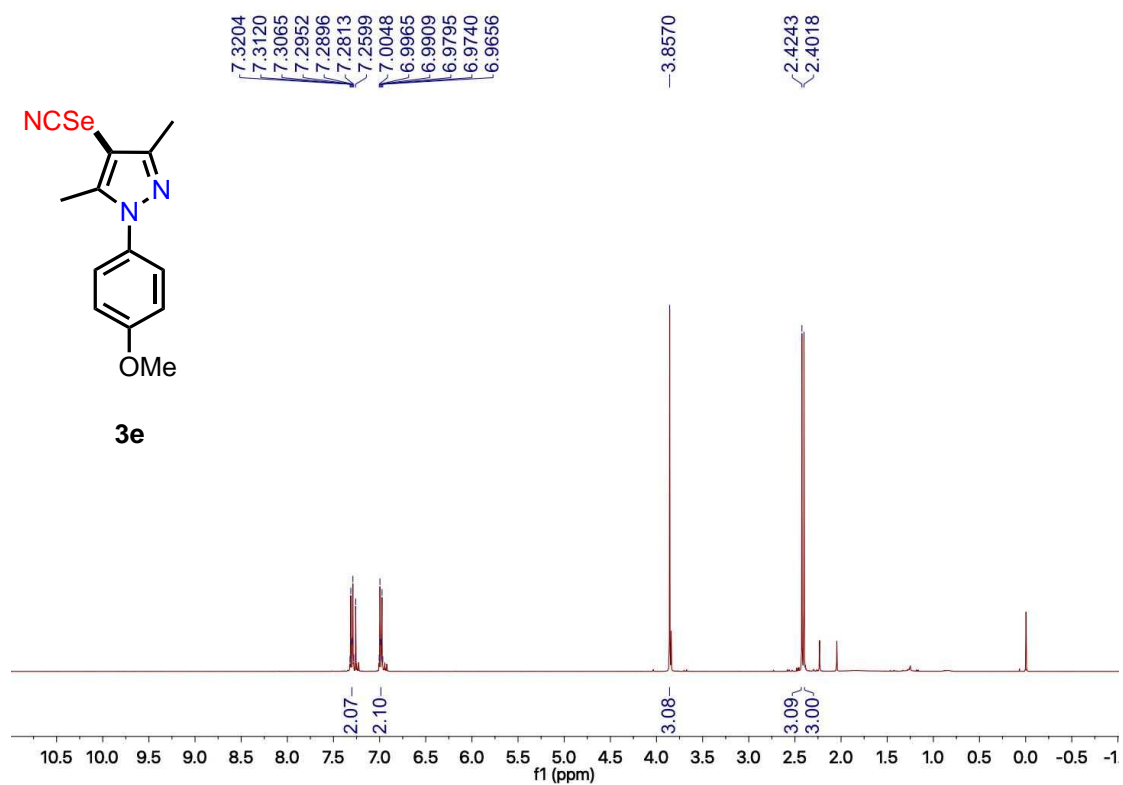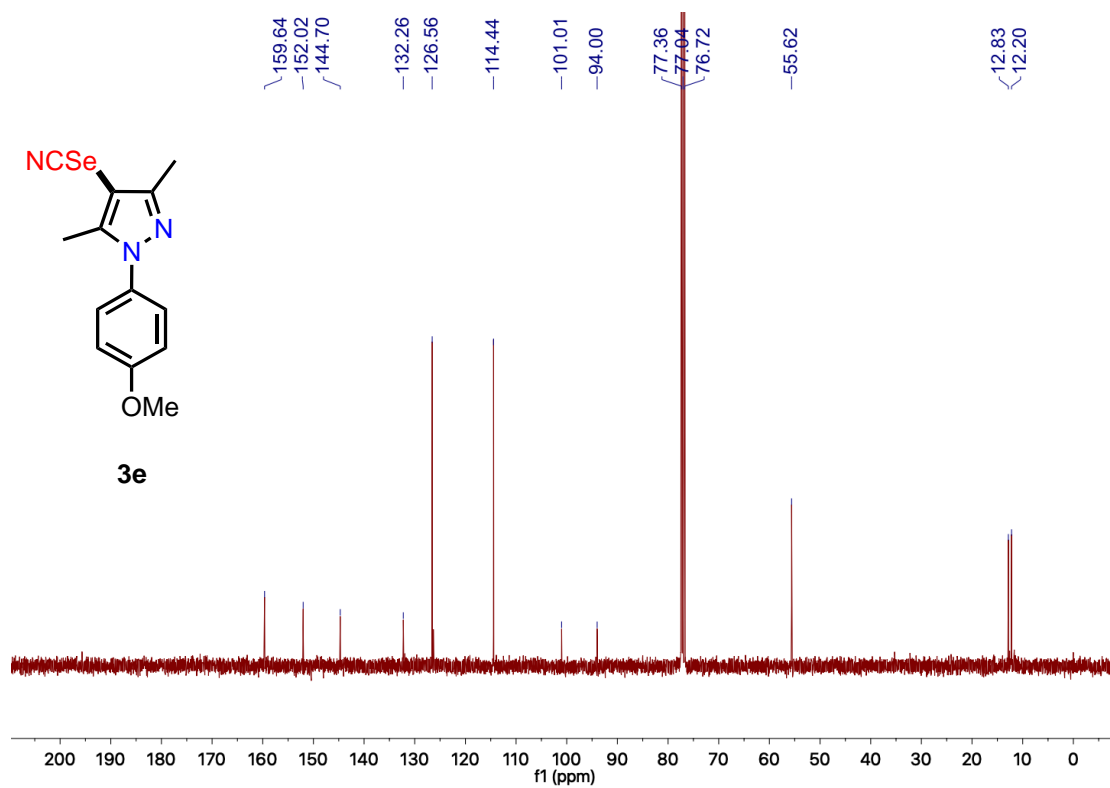

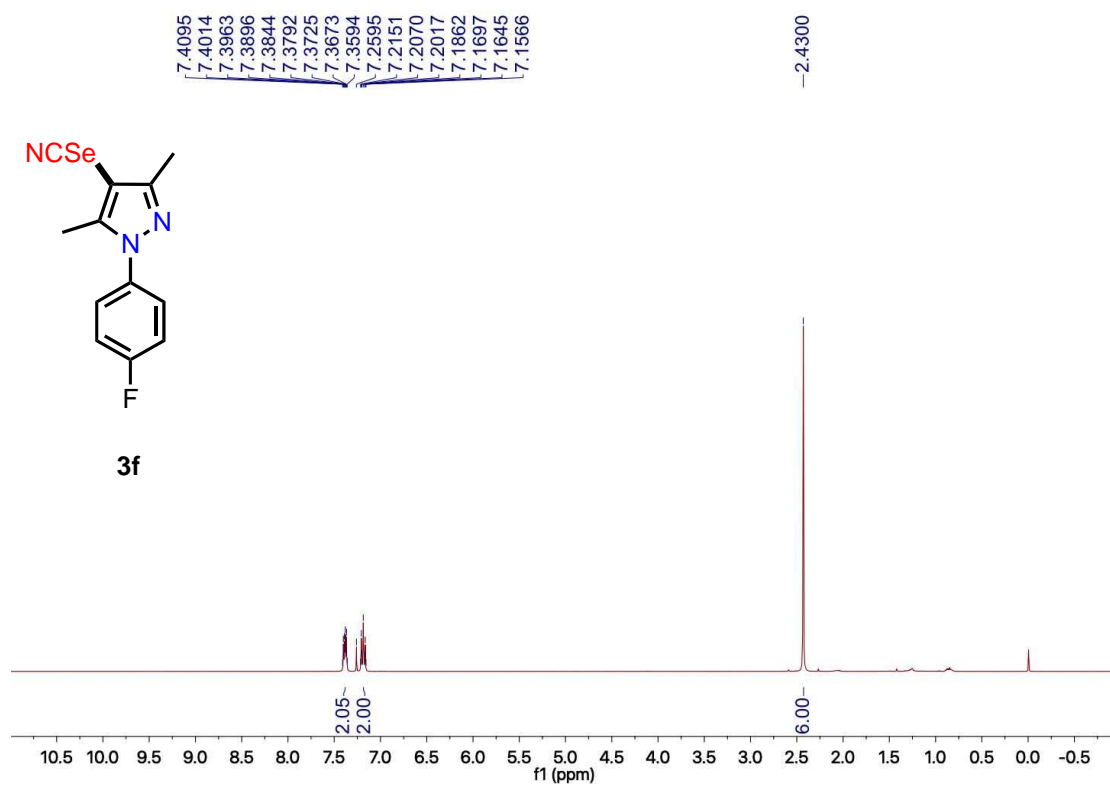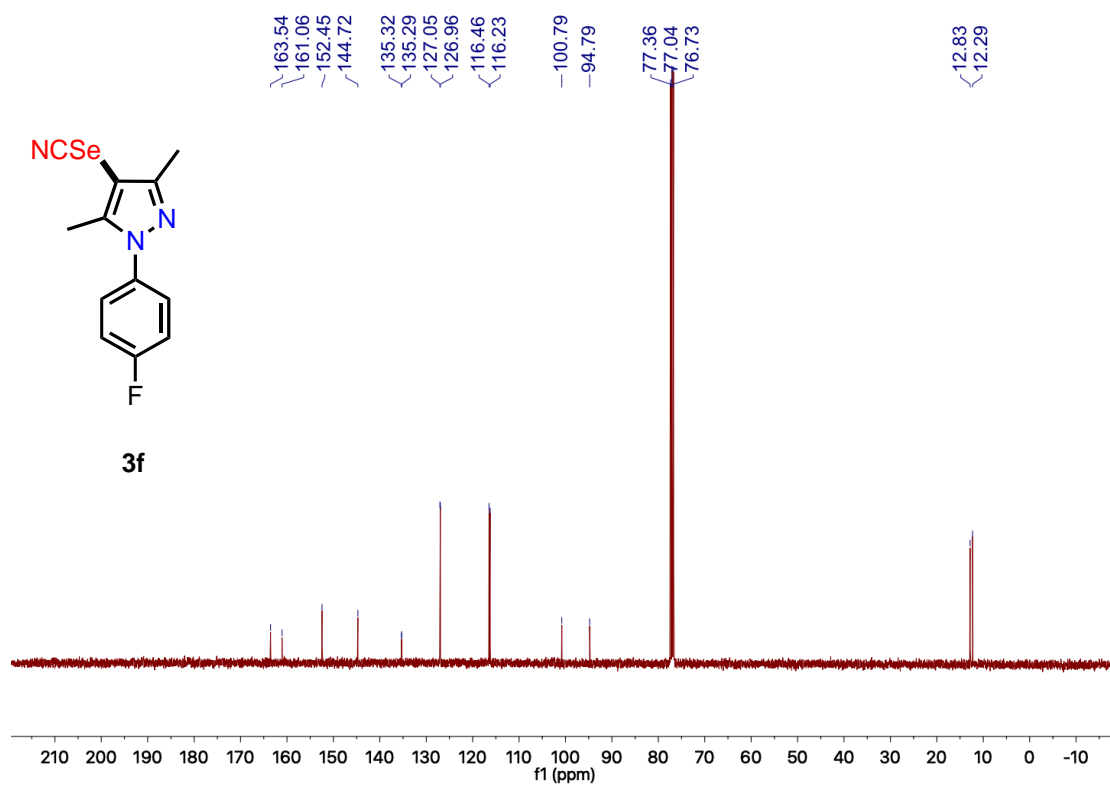

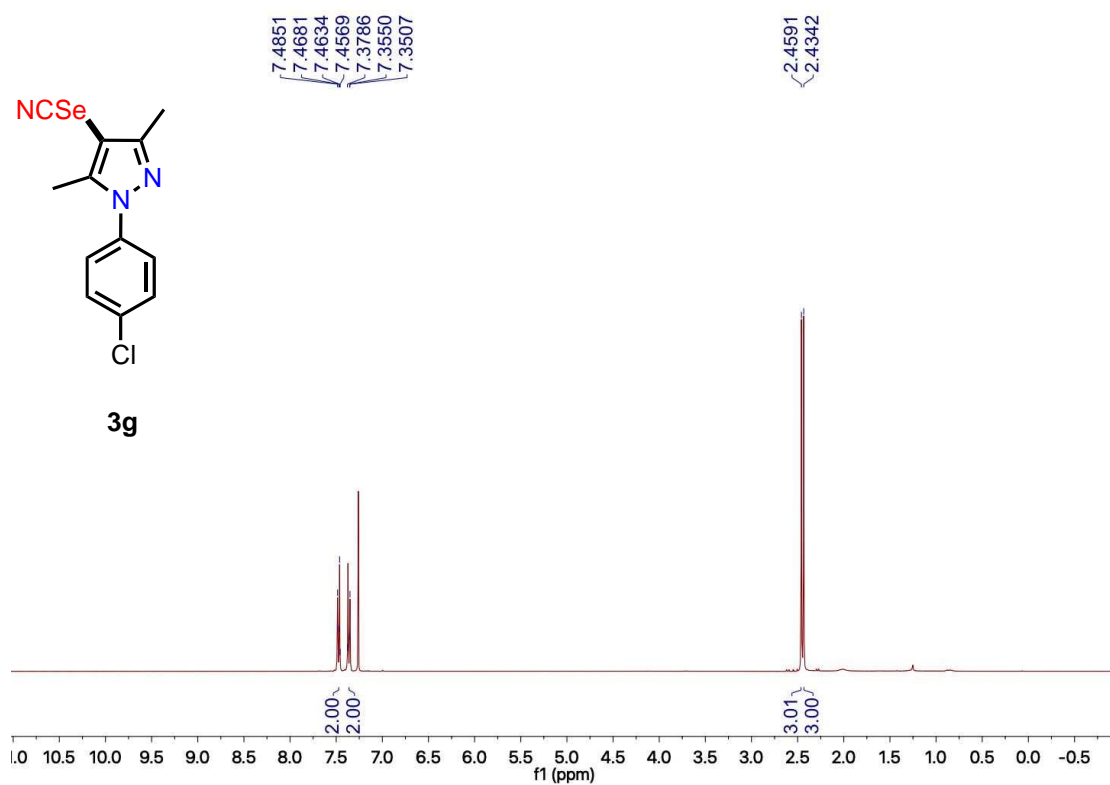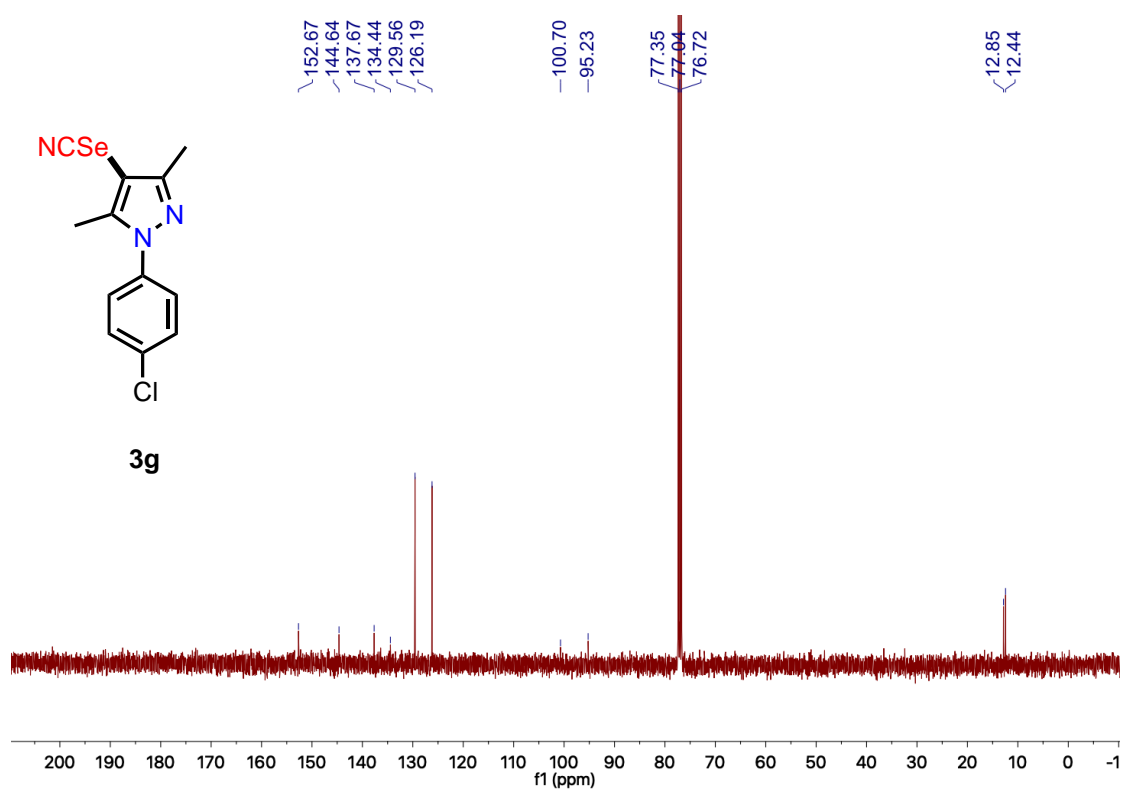



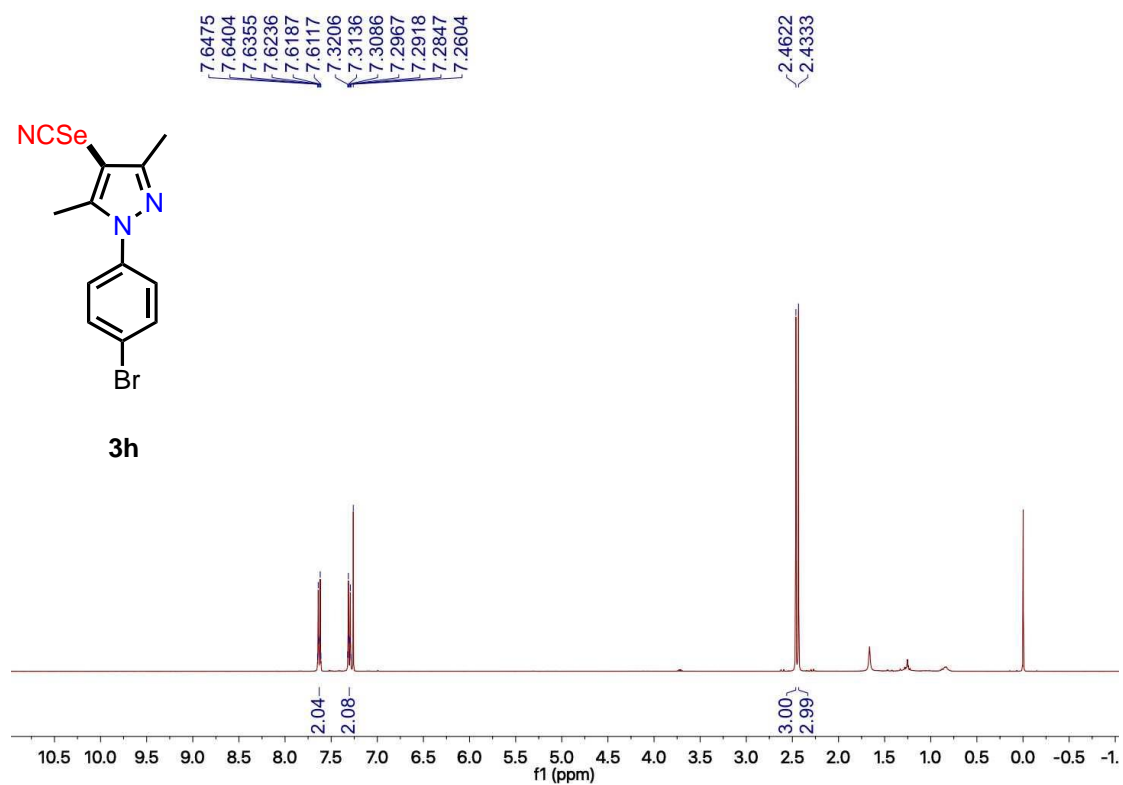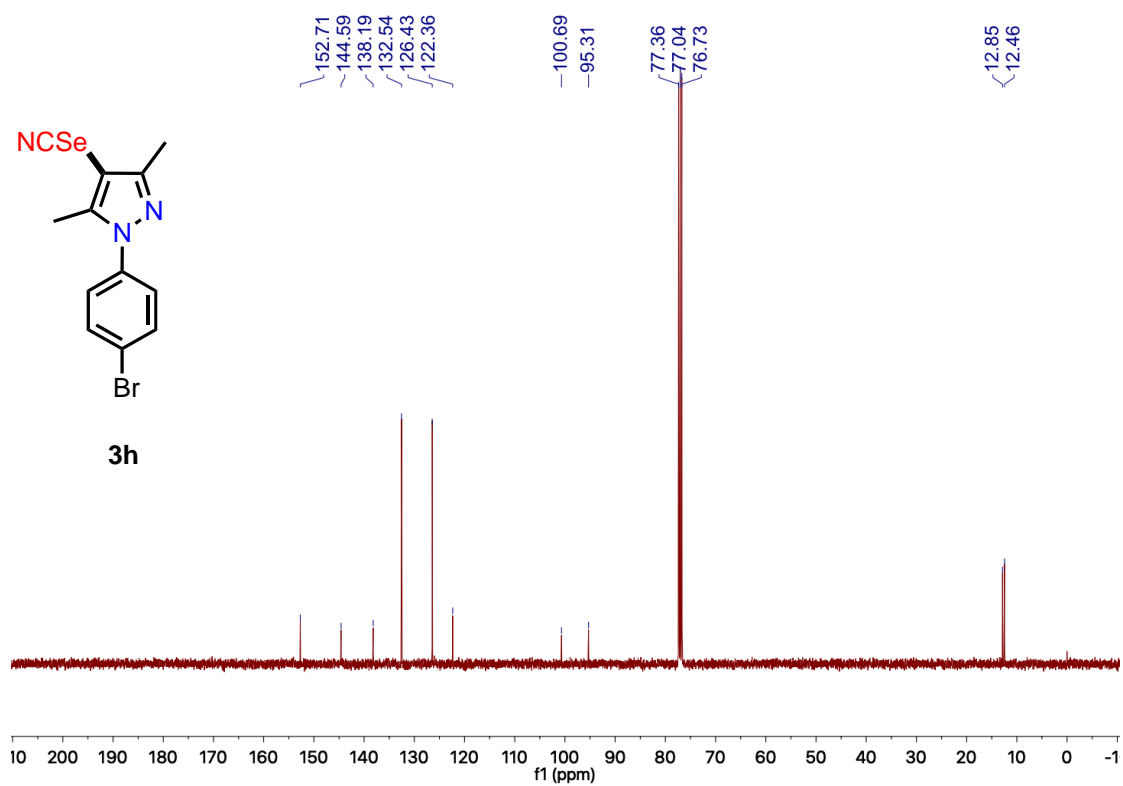

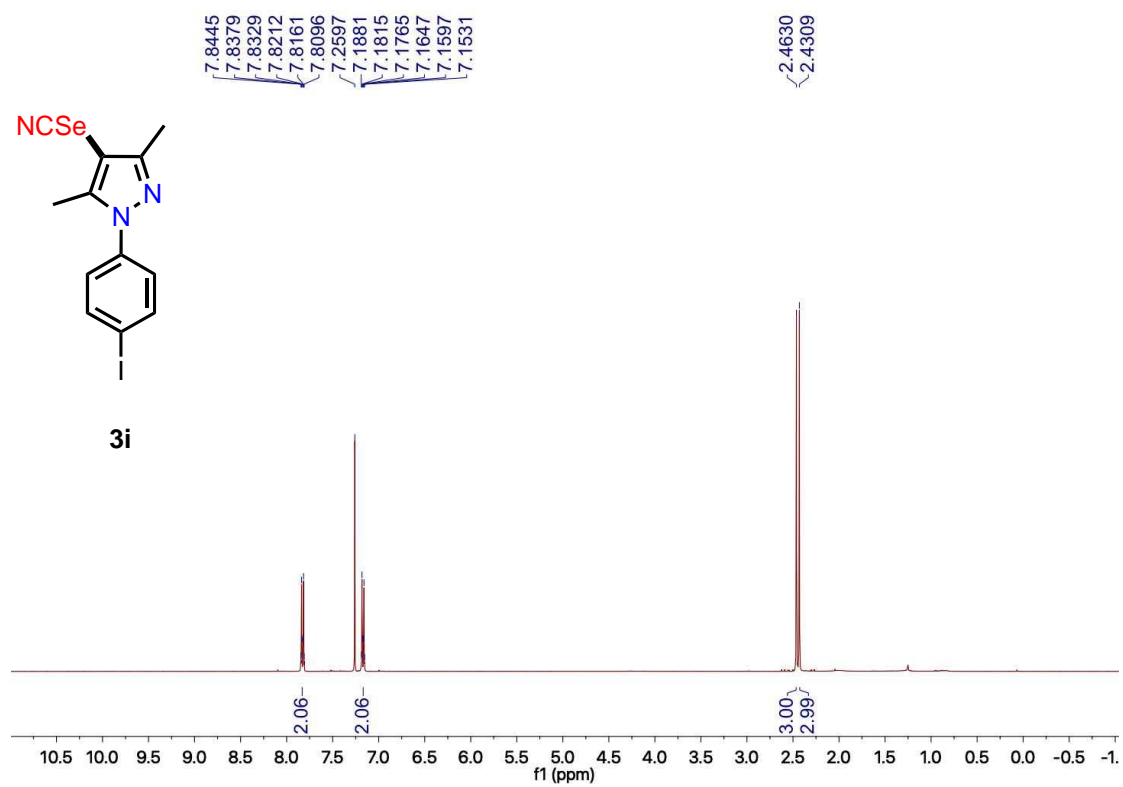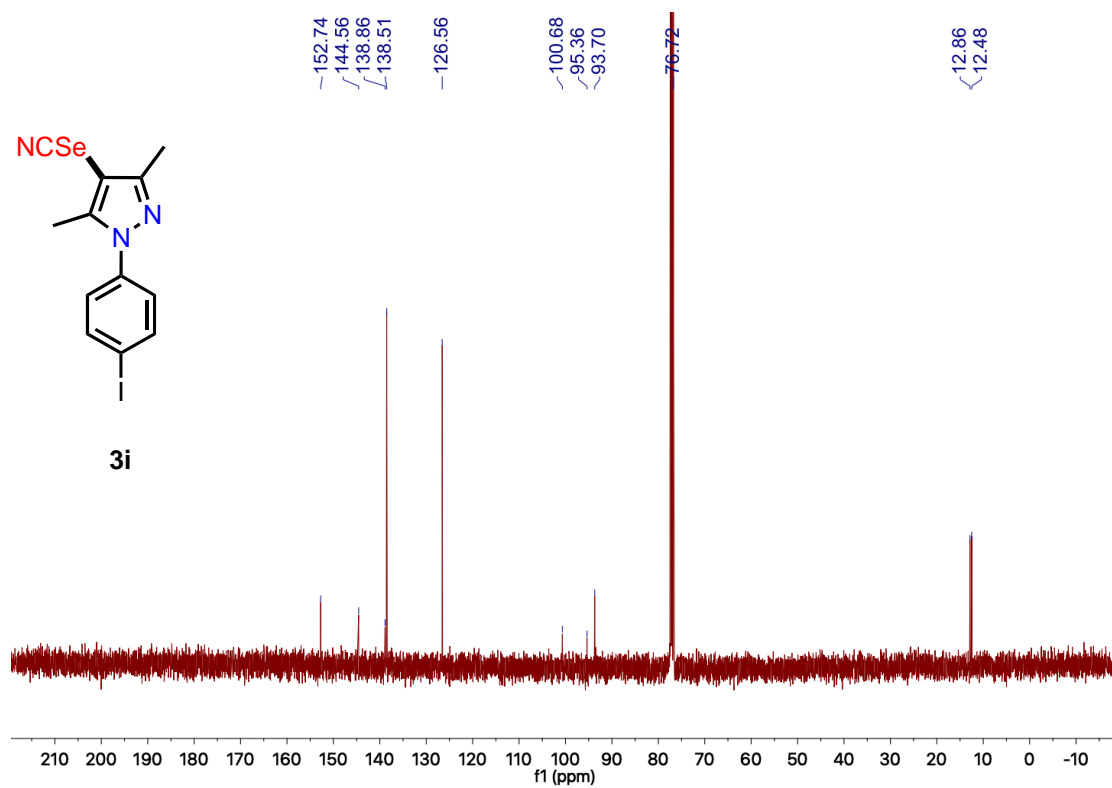

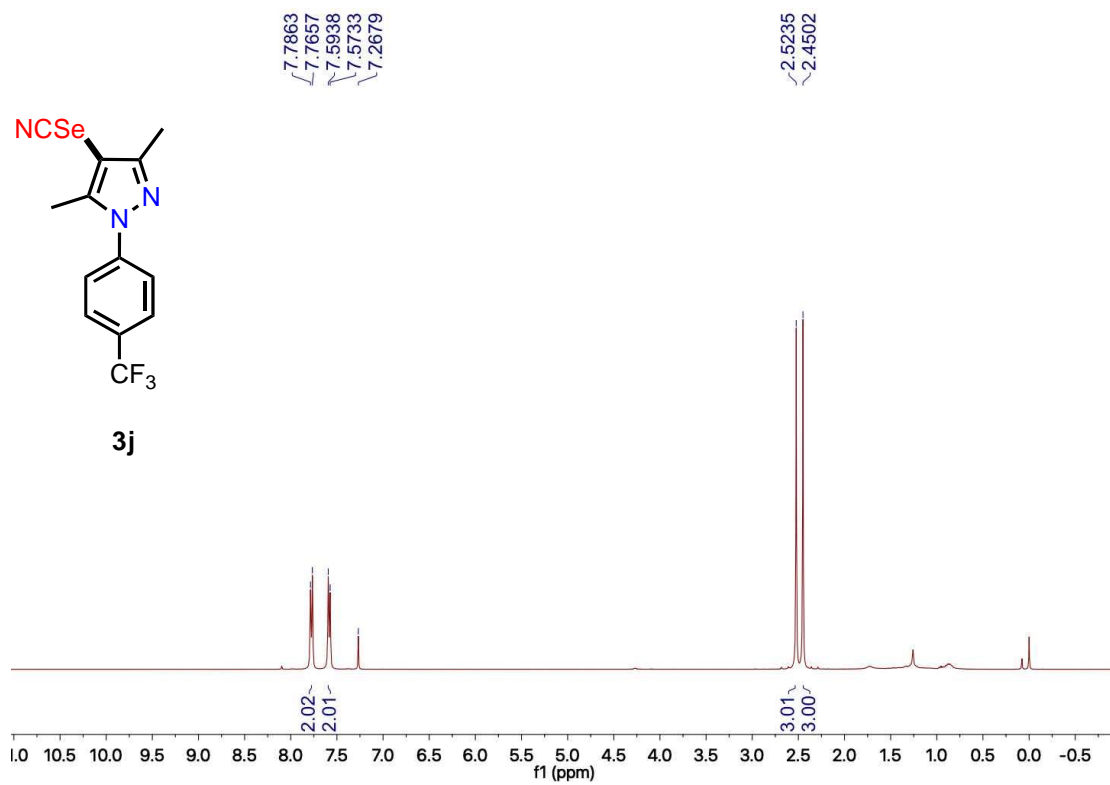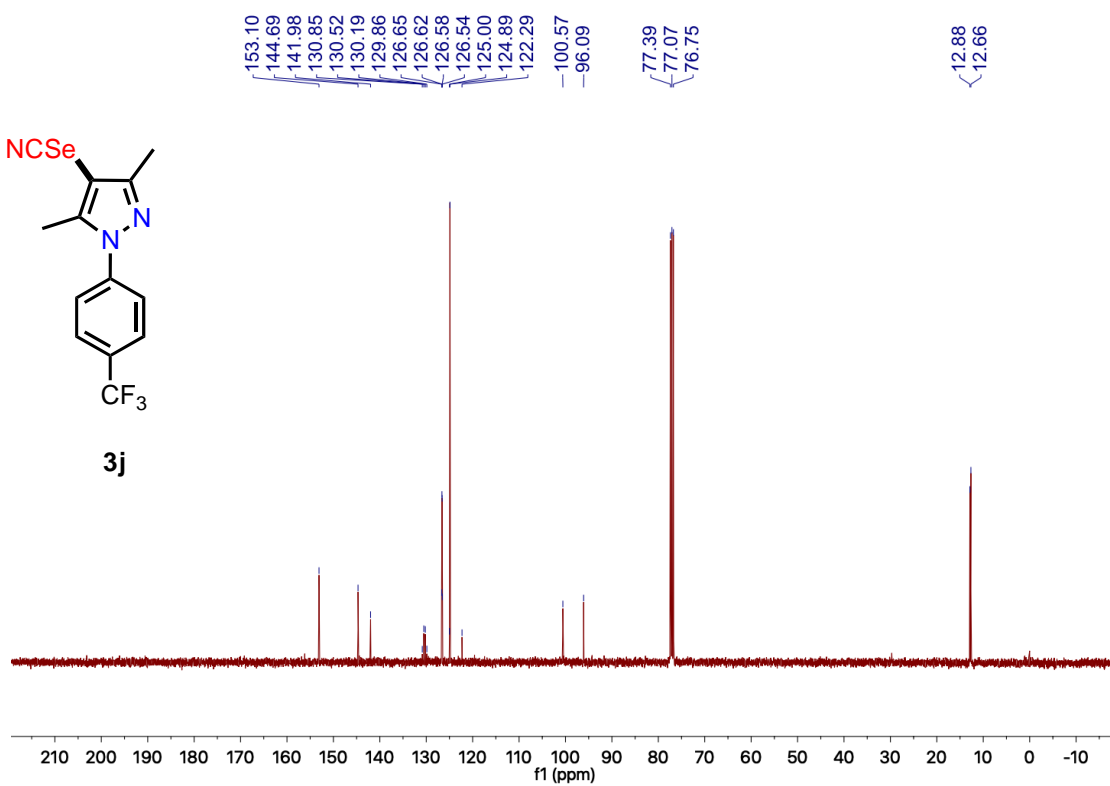

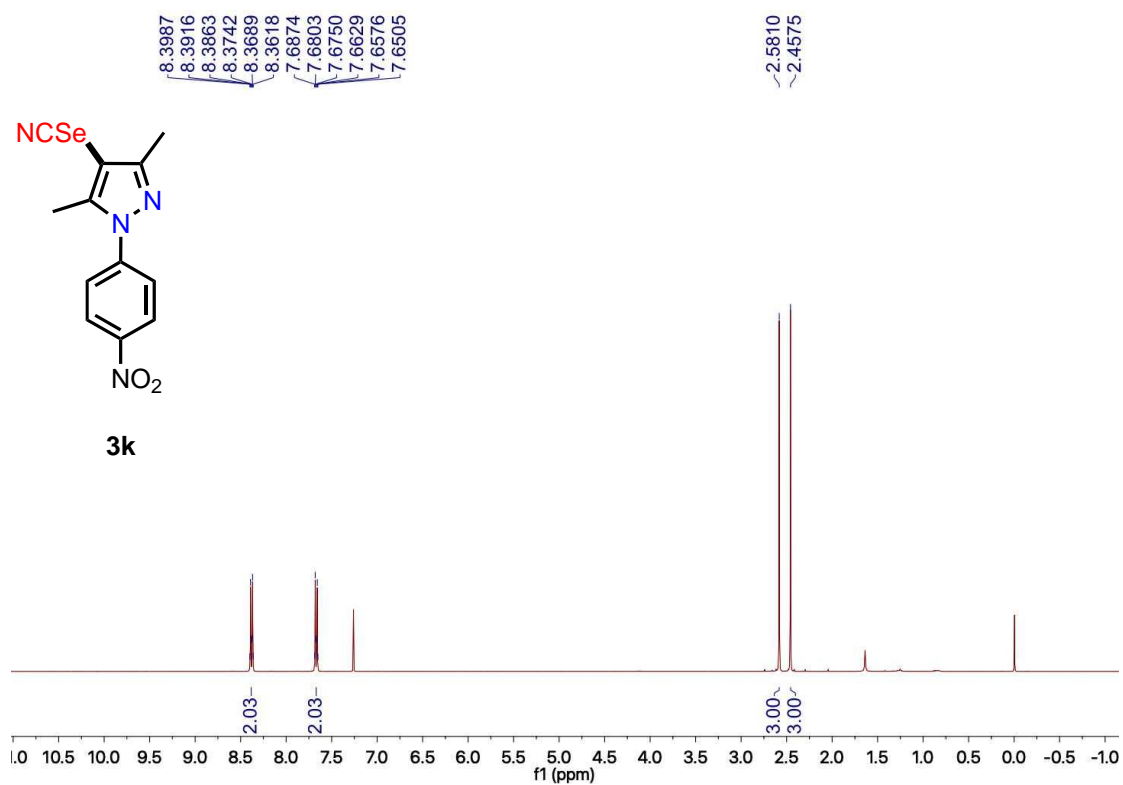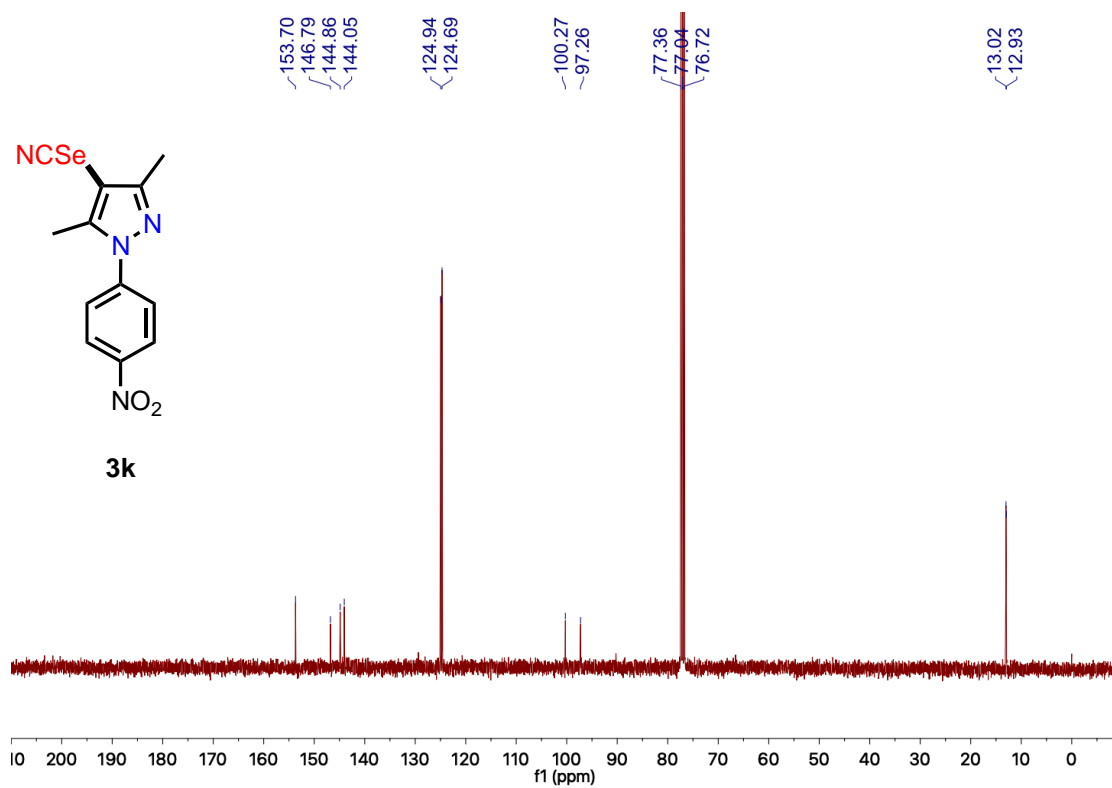

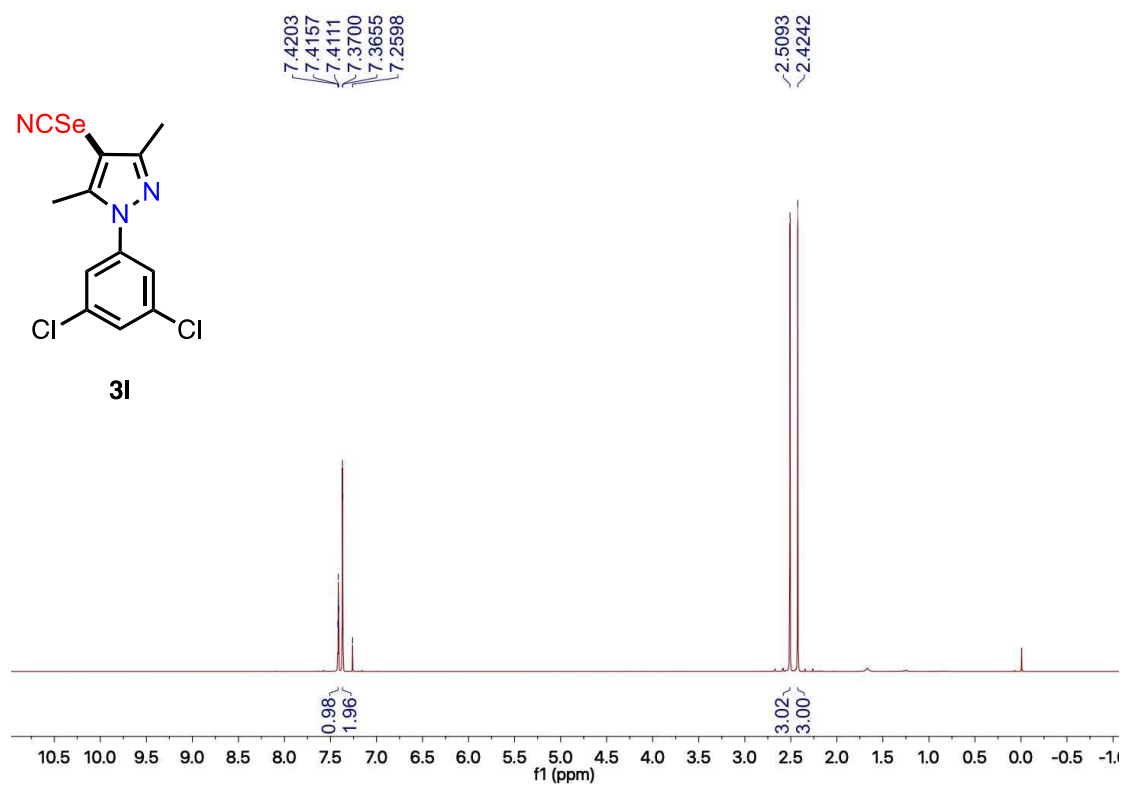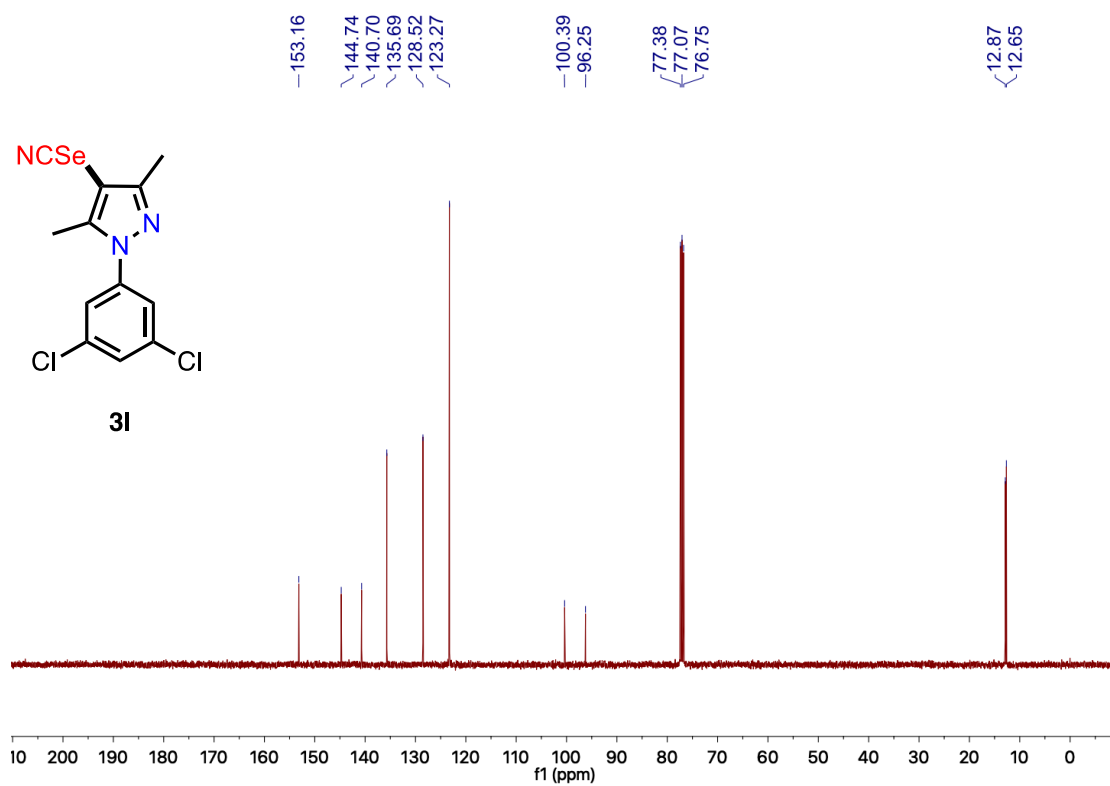

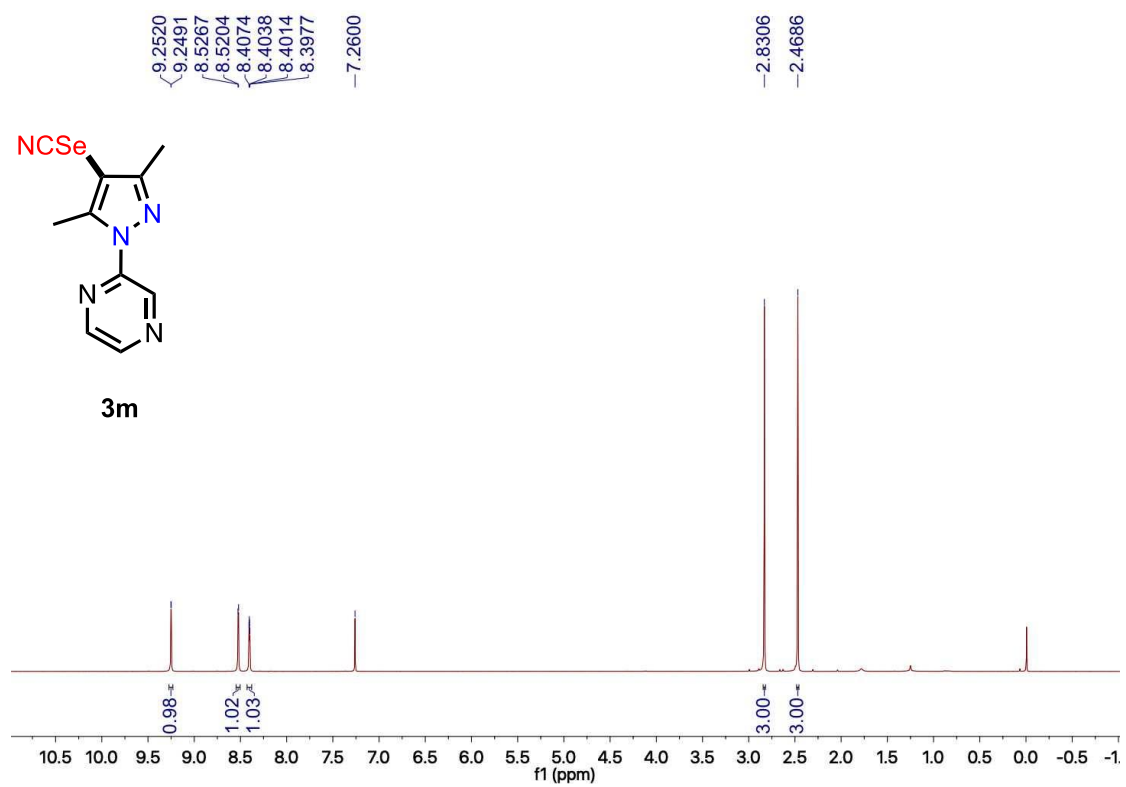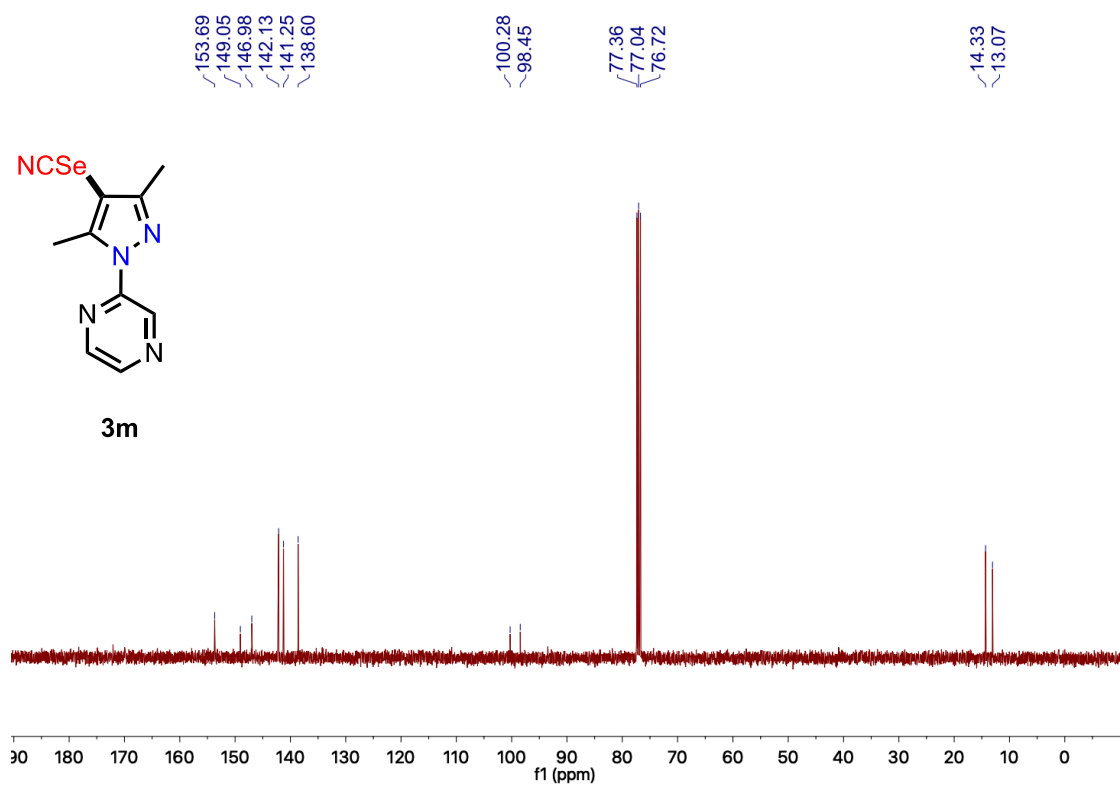

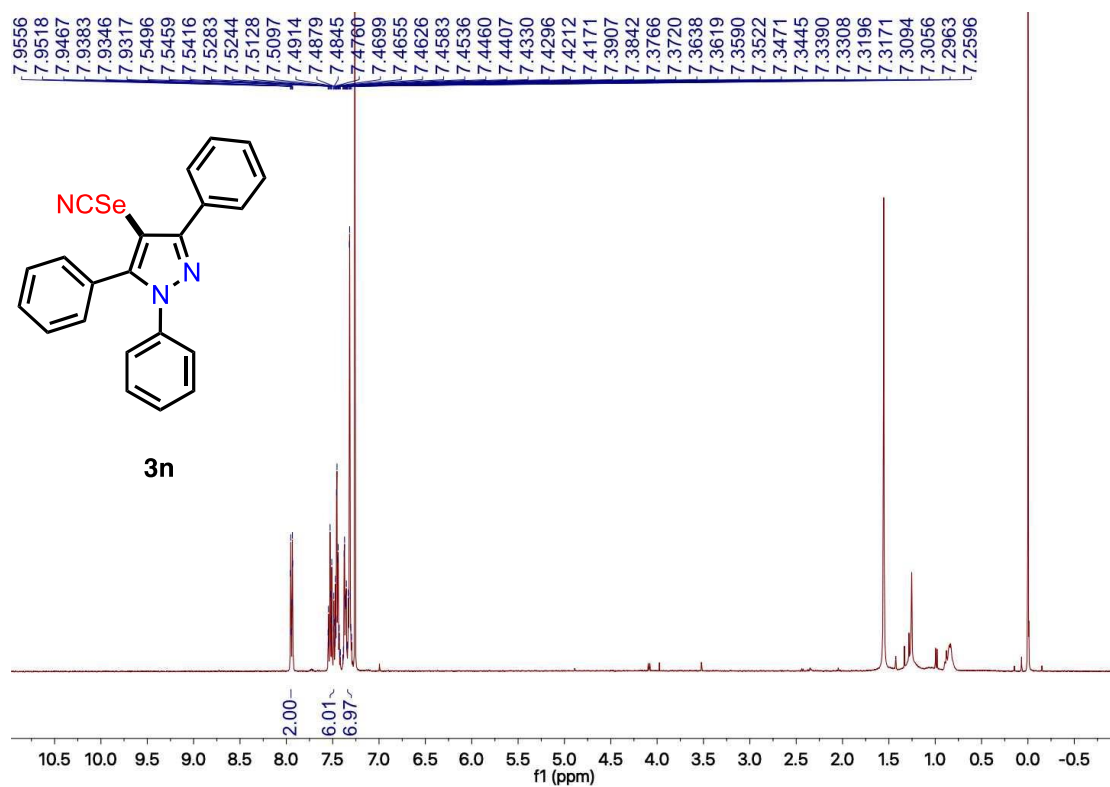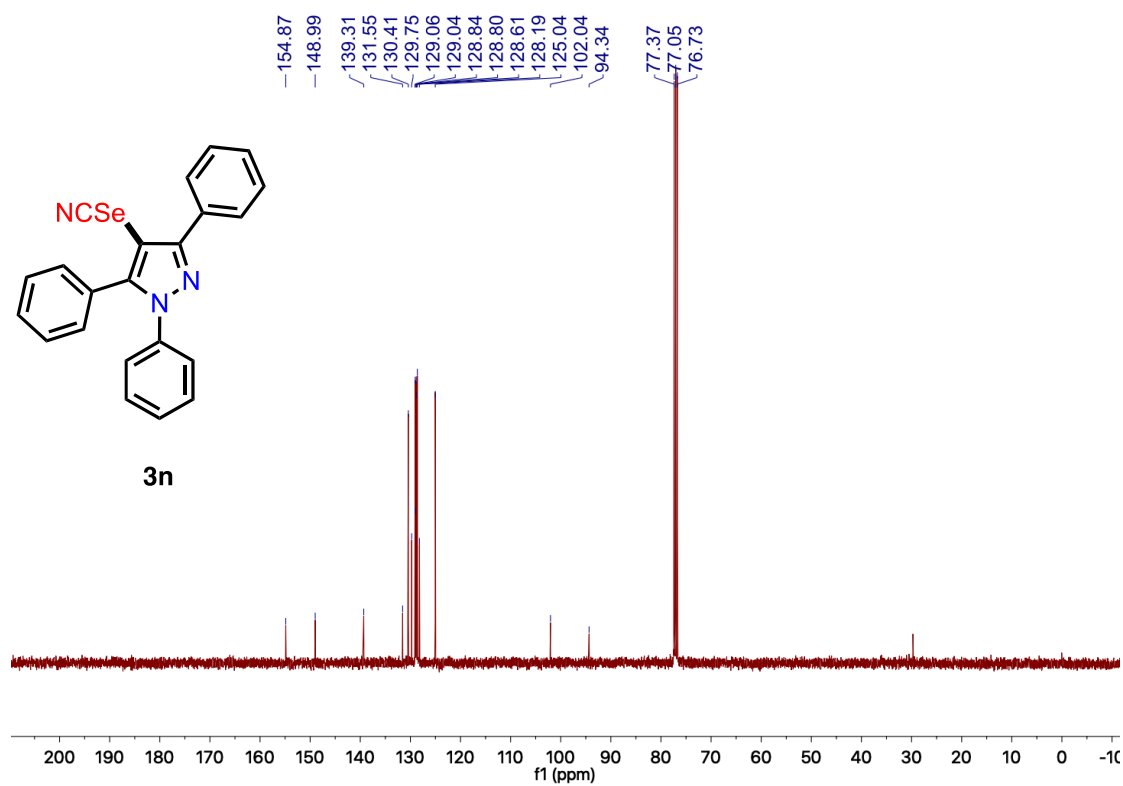





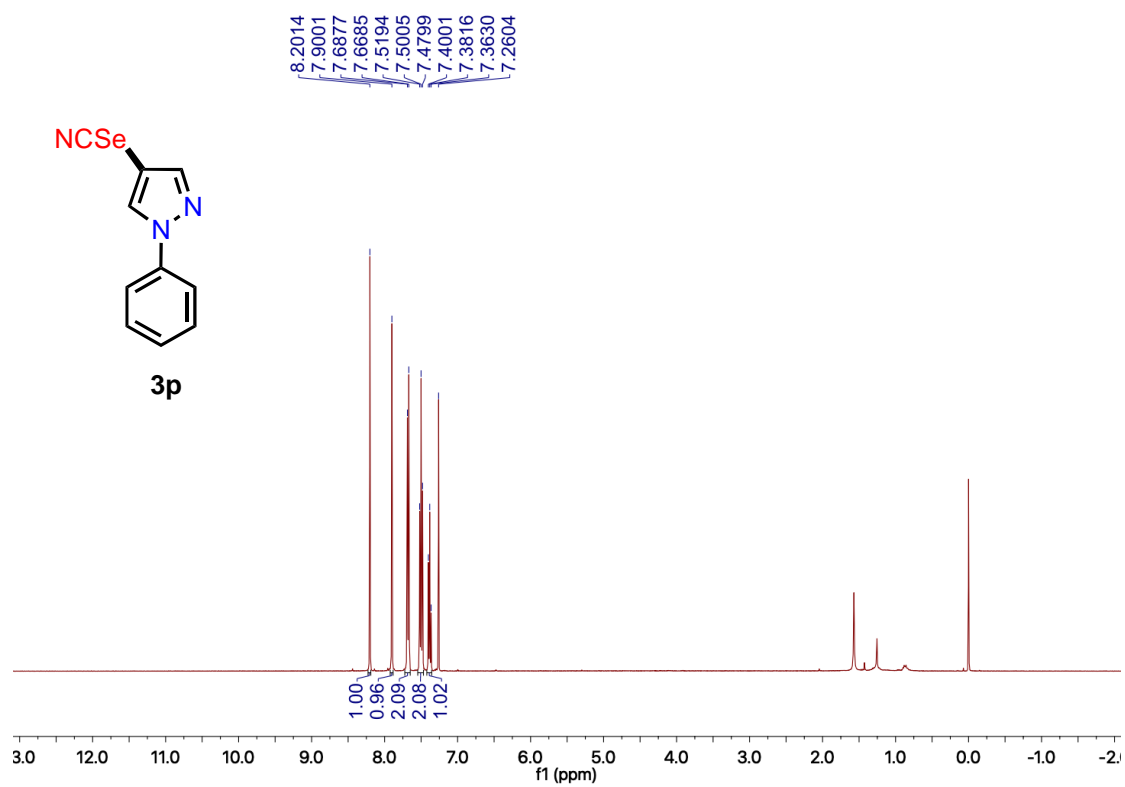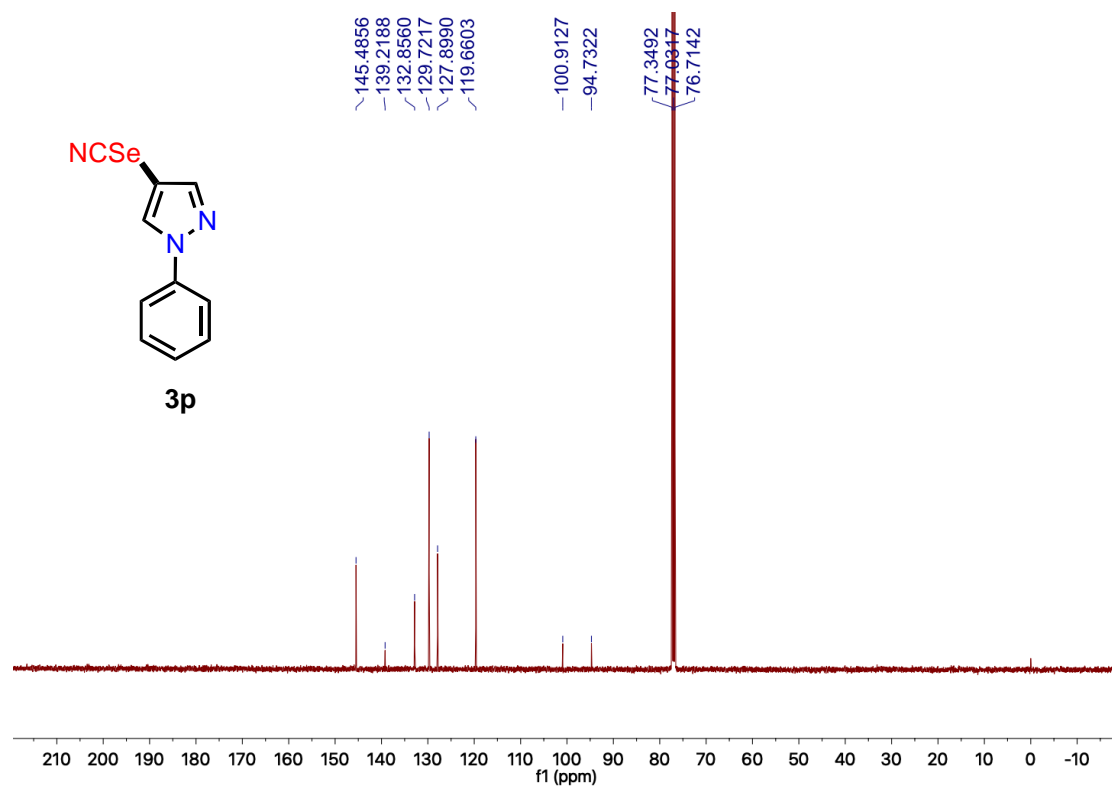

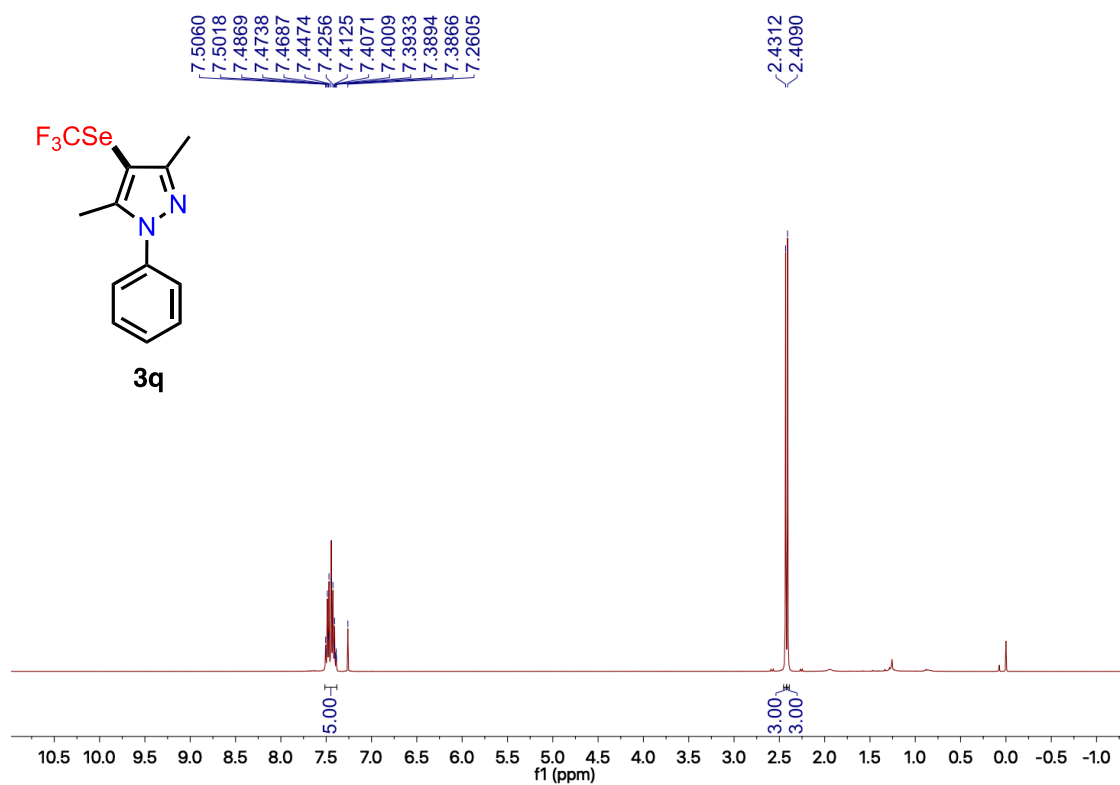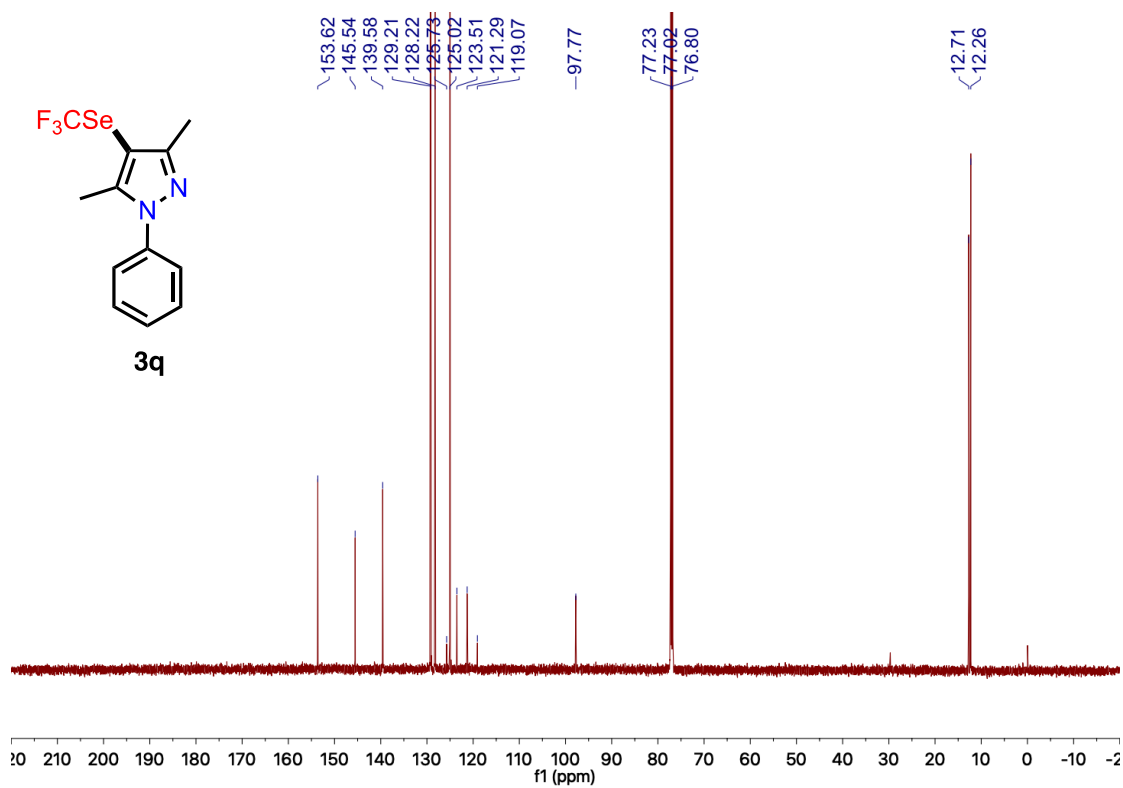

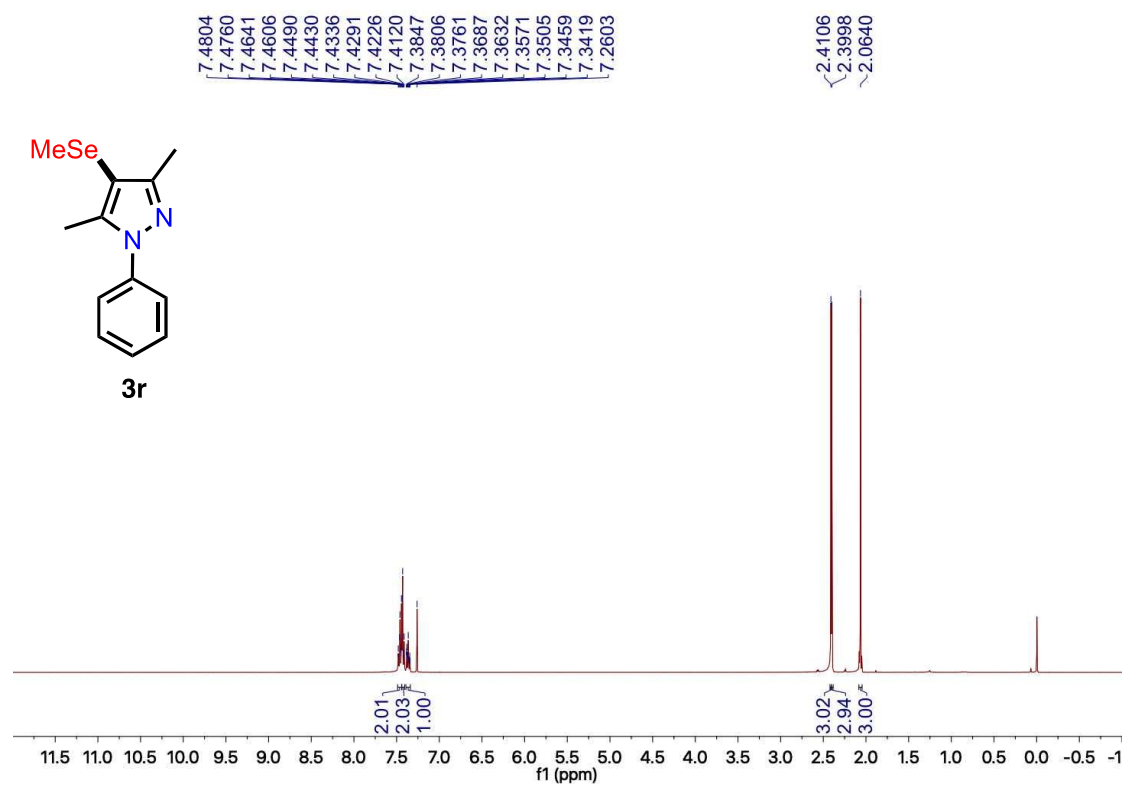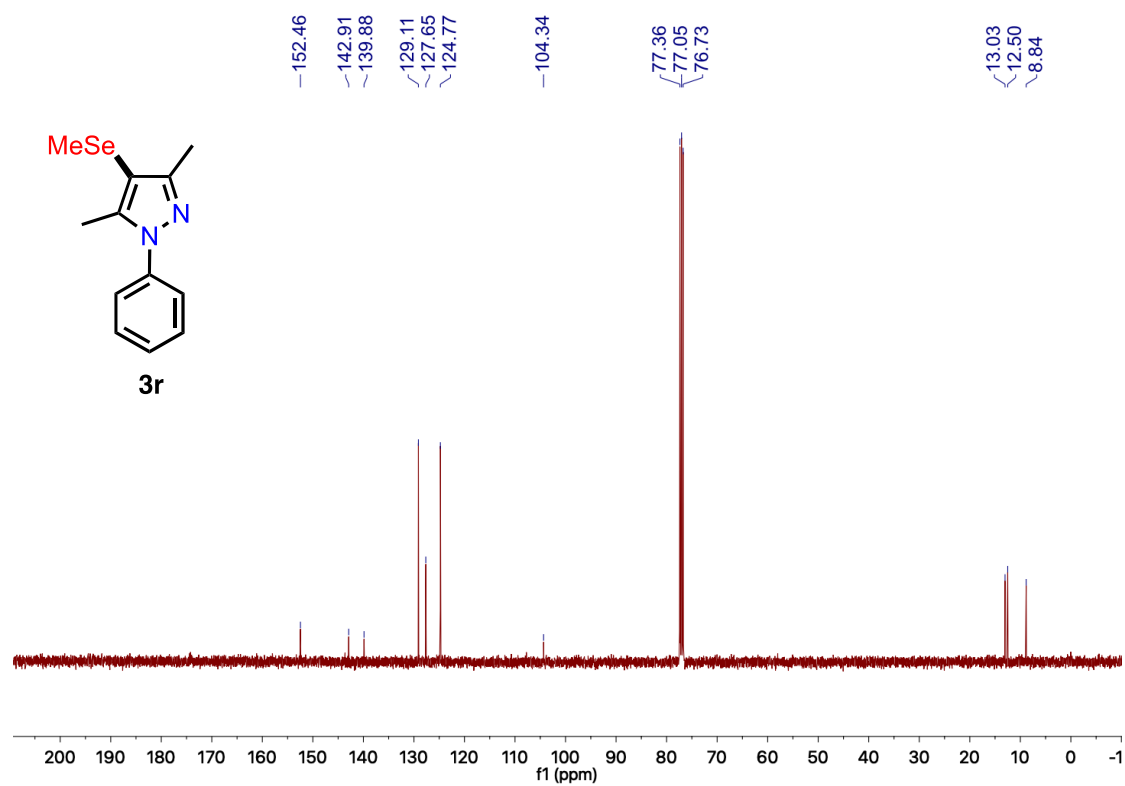

Supplement: Additional file 1 [file 1860-5397-20-128-S1.pdf]
